# Supplementary material for: Tryptophan metabolism determines outcome in tuberculous meningitis: a targeted metabolomic analysis
Source: eLife. 2023 May 9;12:e85307. doi: 10.7554/eLife.85307 (PMC10181821; doi:10.7554/eLife.85307)
Supplement: Source data 1. [file elife-85307-data1.xlsx]

## Sheet: 1. legend
Source data
Online Supplement to Figure 2 of Tryptophan metabolism determines outcome in tuberculous meningitis: a targeted metabolomic analysis
Authors	Edwin Ardiansyah
	Julian Avila Pacheco
	Le Thanh Hoang Nhat
	Sofiati Dian
	Dao Nguyen Vinh
	Hoang Thanh Hai
	Kevin Bullock
	Bachti Alisjahbana
	Mihai G Netea
	Riwanti Estiasari
	Trinh Thi Bich Tram
	Joseph Donovan
	Dorothee Heemskerk
	Tran Thi Hong Chau
	Nguyen Duc Bang
	Ahmad Rizal Ganiem
	Rovina Ruslami
	Valerie Koeken
	Raph L Hamers
	Darma Imran
	Kartika Maharani
	Vinod Kumar
	Clary B. Clish
	Reinout van Crevel
	Guy Thwaites
	Arjan van Laarhoven
	Nguyen Thuy Thuong Thuong
Sheets	2. individual patient clinical metadata and LC-MS measurements. The column header indicate the metabolite names and source (CSF or plasma). Metabolites in between '[]' are absolute quantitaitons in micromolar.
	3. relative peak ion abundances of the pooled CSF samples
	4. absoluate quantitation in micromolar in the pooled CSF samples.
	5. relative peak ion abundances of the pooled plasma samples
	6. absoluate quantitation in micromolar in the pooled plasma samples.

## Sheet: 2. clinical_and_LCMS_data
sex	age	HIV	diagnosis	outcome_60	length_of_followup_up_until_day_60	3-hydroxyanthranilic acid _CSF	3-indoleacetic acid _CSF	3-methoxyanthranilate _CSF	5-HIAA _CSF	5-methoxytryptophol_CSF	kynurenic acid _CSF	L-kynurenine _CSF	L-tryptophan _CSF	N-acetylserotonin_CSF	niacinamide _CSF	quinolinic acid _CSF	xanthurenic acid_CSF	[3-indoleacetic acid]_CSF	[5-HIAA] _CSF	[kynurenic acid] _CSF	[L-kynurenine]_CSF	[L-tryptophan] _CSF	[niacinamide] _CSF	3-hydroxyanthranilic acid _plasma	3-indoleacetic acid _plasma	3-methoxyanthranilate _plasma	5-hydroxytryptophan_plasma	5-methoxytryptophol _plasma	anthranilic acid _plasma	kynurenic acid _plasma	L-kynurenine _plasma	L-tryptophan _plasma	N-acetylserotonin _plasma	niacinamide _plasma	quinolinic acid _plasma	xanthurenic acid _plasma	[3-indoleacetic acid]_plasma	[kynurenic acid] _plasma	[L-kynurenine]_plasma	[anthranilic acid] _plasma	[L-tryptophan] _plasma	[niacinamide] _plasma
Male	24	HIV-positive	TBM	Dead	28	231.123	499.151			949.07	360920	47138.8	11399.8	131.329	93988.1	666623	275.347	0.537642	0.0187913	0.00106164	0.469374	0.0887047	0.00179634	164	1657		275321	26825	202	1101718	10183	545302	731	1089051	1294263	64829
Male	31	HIV-positive	TBM	Alive	60	274.788	953.831			7452.01	969688	67949.5	22086.2	180.129	649261	834640	700.397	1.51555	0.0187913	0.0170817	0.784161	0.138986	0.0952087	143	2074		262321	8978		1539360	13376	1580324	3877	3135607	3340375	116411
Female	38	HIV-positive	TBM	Dead	13		688.537			2922.56	169258	12693.9	370032	196.635	453769	878546	287.95	0.944965	0.0187913			1.77614	0.0623214				190038	15603		1779849	12620	1497111	573	2883757	3435540	237626
Male	34	HIV-positive	TBM	Alive	60		858.754		322.767	1646.02	319884	13935.5	228661	162.188	54754.7	529947	1511.16	1.31106	0.107682			1.11096			1398		300628	7662		207097	7617	1159836	348	5468029	560210	57998
Female	30	HIV-positive	TBM	Alive	60	1081.84	2544.83		889.752	1096.86	3.02872e+06	1.02408e+06	242498	402.6	434255	129578	594.994	4.93738	0.263832	0.0712662	15.2468	1.17607	0.0590387
Male	24	HIV-positive	TBM	Alive	60	231.123	591.16			2428.46	366510	105186	173014	23.6824	328793	682153	1209.08	0.735532	0.0187913	0.00120874	1.3474	0.849133	0.0412971	337			134525	8307		3834787	5381	993307	226	4689779	6199892	585394
Male	23	HIV-positive	TBM	Alive	60	92.5998	451.613		259.927	1093.97	352486	105912	121838	51.6706	904350	841026	495.701	0.4354	0.0903761	0.000839708	1.3584	0.608336	0.138122	130			10444	4965		534329	4648	620489	278	1024471	645659	85516
Male	32	HIV-positive	TBM	Alive	60		950.764			2563.21	505026	161067	20186.9	38.7529	363494	441496		1.50895	0.0187913	0.00485386	2.19267	0.13005	0.0471347	133			1188139	3788		121628	2622	521230	673	3671816	398862	38385
Male	36	HIV-positive	TBM	Alive	60		1580.26			1343.19	257987	381912	57701	39.4706	2.59006e+06	161967	4572.06	2.86284	0.0187913		5.53322	0.306561	0.421705	1415	605		864216	36625		317333	14457	670064	1750	4326695	407348	177777
Male	32	HIV-positive	TBM	Alive	60		670.135		509.858	678.114	616777	92982.1	16592.6	71.0471	803015	710773	1596.33	0.905387	0.159208	0.00779464	1.16281	0.113138	0.121074	289			1642127	45885		661007	4951	763233	1211	5433009	286610	99093
Male	38	HIV-positive	TBM	Alive	60	13530.9	857.221		214.226	1059.19	913636	438858	19612.3	58.1294	702981	593689	428.869	1.30776	0.0777897	0.0156066	6.39459	0.127346	0.104246	490	1528		334834	35157		1037020	6027	670939	805	3089613	547038	96603
Male	27	HIV-positive	TBM	Alive	60		410.209			1776.43	235104	70673.1	30135.7	88.9882	99754.5	771488	3872.81	0.346349	0.0187913		0.825359	0.176861	0.00276641
Female	38	HIV-positive	TBM	Alive	60		2259.6			888.214	1.63398e+06	197196	53099.3	188.741	674211	606669	4489.57	4.32393	0.0187913	0.034563	2.73917	0.284909	0.099406	157	1901		117040	3033		2242381	7670	765188	2041	3496093	74793	280980
Male	30	HIV-positive	TBM	Alive	60		719.207		258.499	1359.13	173124	26403.8	644841	299.259	812394	567426	1279.73	1.01093	0.0899827		0.155732	3.06917	0.122652
Female	30	HIV-positive	TBM	Alive	60	1639.69	508.352			2469.03	716350	56933.5	4838.95		477637	305098	1059.38	0.557431	0.0187913	0.010415	0.617531	0.0578345	0.0663367	409	669		1931150	4948		650021	5214	546543	776	4674151	137622	82428
Male	28	HIV-positive	TBM	Alive	60		623.364			1566.33	312733	32691.3	53868.6		532766	566392	1020.04	0.804793	0.0187913		0.250838	0.288529	0.075611	904	1110		26141	4309	113	1326232	22476	740701	869	1759812	853506	49236
Male	49	HIV-positive	TBM	Alive	60	841.68	1050.44		809.774	1046.15	2.19956e+06	255824	15321.9	166.494	1.17214e+06	1.58183e+06	4038.17	1.72333	0.241805	0.0494463	3.62599	0.107159	0.183171
Male	34	HIV-positive	TBM	Alive	60	867.277	624.897			1118.6	707734	90503	17927.9	84.6824	139473	1.38897e+06	1401.18	0.808091	0.0187913	0.0101882	1.12531	0.119421	0.00944818		2901		980797	9728		118743	3743	607290	563	3474475	4771037	95367
Male	18	HIV-positive	TBM	Follow-up < 60 days	35	126.478	658.634			1167.86	560530	43434.4	232906	59.5647	243480	1.56573e+06	1213.67	0.880651	0.0187913	0.00631449	0.41334	1.13093	0.026945
Female	26	HIV-positive	TBM	Alive	60	350.073	710.006		237.077	1357.68	1.34449e+06	109710	3190.29	153.576	636066	315041	587.738	0.991139	0.0840829	0.0269447	1.41584	0.0500773	0.0929889
Male	31	HIV-positive	TBM	Alive	60	2522.03	497.618			1282.33	408718	276918	36818.1	69.6118	829673	578629	979.563	0.534344	0.0187913	0.00231947	3.94507	0.208302	0.125559
Male	23	HIV-positive	TBM	Alive	60	807.049	815.817		378.466	2579.15	436501	48772.2	13959.6	63.8706	152454	536462	351.726	1.21871	0.123022	0.0030506	0.494081	0.100749	0.0116319	1331	1783		231661	8096	339	213890	25591	1381505	636	2196425	836735	142913
Female	39	HIV-positive	TBM	Alive	60	539.789	657.1			1351.88	275983	85842.1	31532.7		1.68667e+06	265119	546.493	0.877352	0.0187913		1.05481	0.183434	0.269729
Female	23	HIV-positive	Cryptococcal meningitis	Follow-up < 60 days	3	376.422	840.353			3021.09	230804	144010	73777.8	4484.58	844433	159273	712.618	1.27148	0.0187913		1.93467	0.382205	0.128042
Female	48	HIV-positive	TBM	Alive	60	625.614	2187.52		668.385	914.295	557358	362207	26384.3		1.84643e+06	109116	214.626	4.16891	0.202866	0.00623102	5.23515	0.15921	0.296606
Male	37	HIV-positive	Cryptococcal meningitis	Alive	60	390.726	346.569			3452.88	196158	115945	48469.5		372370	233967	591.939	0.209476	0.0187913		1.51015	0.263125	0.048628
Male	37	HIV-positive	TBM	Alive	60	569.903	503.751			1621.39	134052	66197.3	6084.6	44.4941	310101	47316.3		0.547537	0.0187913		0.757656	0.0636955	0.0381526
Male	34	HIV-positive	TBM	Alive	60	1379.96	416.343			1005.58	248751	117589	17208.7	53.1059	154562	514308	2659.14	0.359542	0.0187913		1.53502	0.116037	0.0119865
Male	32	HIV-positive	Cryptococcal meningitis	Follow-up < 60 days	4	161.862	614.163		402.745	2737.09	377233	50752.7	103389	289.212	1.30273e+06	335878	535.8	0.785004	0.129708	0.00149093	0.524039	0.521532	0.20514
Male	40	HIV-positive	TBM	Alive	60		661.701			1643.12	93740.5	9814.96	113431	68.1765	59549.7	651410	1839.59	0.887247	0.0187913			0.568783
Male	36	HIV-positive	TBM	Alive	60		461.58		445.59	1675	172587	7819.55	116133	63.8706	897145	287155	467.823	0.456838	0.141508			0.581494	0.13691
Male	25	HIV-positive	TBM	Alive	60		1983.57	1207.94	272.781	991.09	1.90378e+06	865012	952151	88.2706	383691	4.12966e+06	724.839	3.73026	0.093916	0.0416628	12.8407	4.51512	0.0505324
Male	43	HIV-positive	TBM	Alive	60	7873.25	915.494		641.25	1217.13	2.24968e+06	453136	9765.63	238.259	769927	627756	993.694	1.43309	0.195393	0.0507654	6.61058	0.0810155	0.115508
Male	43	HIV-positive	TBM	Alive	60	1020.86	660.934		934.025	1292.47	975357	258136	45559.8	43.0588	1.01621e+06	577357	266.563	0.885598	0.276025	0.0172309	3.66095	0.249434	0.15694
Male	32	HIV-positive	TBM	Alive	60	289.845			425.596	985.294	438856	311070	64344.8	89.7059	573434	1.54186e+06			0.136002	0.00311257	4.46165	0.337821	0.0824524
Male	26	HIV-positive	TBM	Alive	60	566.892	673.202		195.66	1169.31	757933	228239	31503.8	63.8706	975229	514963	548.785	0.911983	0.0726765	0.0115092	3.20874	0.183298	0.150046
Male	48	HIV-positive	TBM	Alive	60	640.67	779.78			1222.92	635854	187119	46182.6	38.0353	667546	1.06033e+06		1.1412	0.0187913	0.00829666	2.58675	0.252365	0.0982847
Male	27	HIV-positive	TBM	Alive	60	131.748	499.918		462.728	1640.22	215616	33462.7	112060	93.2941	54190.9	250461	1888.86	0.539292	0.146228		0.262507	0.562332
Male	32	HIV-positive	TBM	Alive	60	2381.25			1359.62	1202.64	1.60397e+06	459050	11714.1	258.353	1.1349e+06	433118	1020.81		0.393235	0.0337731	6.70002	0.0901836	0.176906
Male	29	HIV-positive	TBM	Alive	60		207.788		458.444	4122.3	381936	91351.4	150342	120.565	771615	2.67916e+06	677.866		0.145048	0.0016147	1.13814	0.742455	0.115792
Male	24	HIV-positive	TBM	Alive	60	91.847	320.499			2287.91	207985	25328.4	18163.2	216.729	1.28673e+06	1.28507e+06	585.065	0.153407	0.0187913		0.139465	0.120528	0.202449
Male	36	HIV-positive	TBM	Alive	60	335.769	1679.94		674.098	2270.52	822950	136237	452809	88.9882	441505	457894	639.676	3.07722	0.20444	0.0132202	1.81709	2.16562	0.0602584
Female	35	HIV-positive	TBM	Alive	60		1085.71			1128.74	2.33408e+06	349444	28843.8		1.26245e+06	130770	1280.12	1.79919	0.0187913	0.0529863	5.0421	0.170782	0.198364
Female	46	HIV-positive	TBM	Alive	60	1038.93	506.818		451.303	1286.68	654479	140511	19572.7	83.9647	1.8581e+06	547932	421.613	0.554133	0.143081	0.0087868	1.88175	0.12716	0.298569
Female	30	HIV-positive	TBM	Alive	60	146.805	557.424		182.806	947.621	375254	26153.9	24104.1	38.0353	421497	584650	676.338	0.662972	0.0691366	0.00143885	0.151951	0.148481	0.0568925
Male	34	HIV-positive	TBM	Alive	60	2394.8	648.666		254.215	899.805	974412	957359	22889.3	185.153	758018	418194	937.555	0.859213	0.0888028	0.017206	14.2376	0.142765	0.113505
Male	28	HIV-positive	TBM	Dead	58	850.714	541.322			1757.59	5875.76	158515	216002	45.2118	821748	10110.9	79.8163	0.628342	0.0187913		2.15407	1.0514	0.124226
Male	32	HIV-positive	TBM	Alive	60	6691.28	1341.04		352.759	1882.2	2.29319e+06	275494	6504	105.494	570463	240972	680.157	2.34833	0.115942	0.0519103	3.92353	0.0656689	0.0819527
Male	39	HIV-positive	TBM	Alive	60	135.512	989.868		549.847	1582.27	1.13522e+06	201447	592835	130.612	790079	506805	2694.66	1.59305	0.170221	0.0214377	2.80346	2.82447	0.118898
Male	29	HIV-positive	TBM	Alive	60		307.465			6005.95	197159	77619.9	492824	696.118	654160	143707	905.476	0.125373	0.0187913		0.930437	2.3539	0.0960328
Male	27	HIV-positive	TBM	Alive	60	1072.8	684.703			5484.32	1.4764e+06	532059	17524.9	35.8824	1.79263e+06	368971	843.608	0.936719	0.0187913	0.0304161	7.80437	0.117524	0.287554
Male	44	HIV-positive	Cryptococcal meningitis	Follow-up < 60 days	2	1718.74	699.271		642.678	1186.7	1.15807e+06	368864	34774.1	433.459	1.28545e+06	677894	1206.03	0.968052	0.195787	0.022039	5.33586	0.198685	0.202233
Male	29	HIV-positive	TBM	Dead	3	157.344	821.184		338.477	1273.64	547360	53275	261039	85.4	407764	1.29848e+06	761.883	1.23026	0.112009	0.00596792	0.562192	1.26331	0.0545821
Male	32	HIV-positive	TBM	Alive	60	120.455	918.561		257.071	576.687	901388	269358	9526.53	94.7294	678664	1.32558e+06	222.645	1.43969	0.0895894	0.0152843	3.83071	0.0798905	0.100155
Female	28	HIV-positive	Cryptococcal meningitis	Follow-up < 60 days	7	295.115	1026.67			3183.37	417296	18701.8	70523.9	589.188	3.02768e+06	583800	1001.33	1.67221	0.0187913	0.00254521	0.0392298	0.366895	0.495325
Male	34	HIV-positive	TBM	Alive	60	749.08	430.911		774.07	1222.92	2.75185e+06	863706	11587.8	144.965	144659	898039	5349.98	0.390875	0.231972	0.0639801	12.8209	0.0895893	0.0103206
Male	26	HIV-positive	TBM	Alive	60	357.601	545.922			1654.71	422070	132096	71851.5	97.6	332557	1.7762e+06	1366.81	0.638236	0.0187913	0.00267084	1.75445	0.373142	0.0419302
Male	41	HIV-positive	TBM	Alive	60	4371.77	824.251		825.484	2329.93	2.28559e+06	713269	19896.7		534757	55833.4	1461.9	1.23685	0.246132	0.0517104	10.5454	0.128684	0.0759459
Male	39	HIV-positive	TBM	Alive	60	185.2	998.302			1343.19	152545	95451.7	214435	63.8706	824906	216891	344.852	1.61119	0.0187913		1.20016	1.04403	0.124757
Male	35	HIV-positive	TBM	Dead	5	2493.42	1088.78		498.432	978.049	3.03103e+06	528354	14280.6	131.329	391476	683092	282.221	1.80578	0.156061	0.0713269	7.74834	0.10226	0.051842
Male	31	HIV-positive	TBM	Alive	60	574.42	624.13			4070.13	1.30901e+06	488362	131366	78.9412	837313	1.50444e+06	2202.01	0.806442	0.0187913	0.0260112	7.14341	0.653169	0.126844
Male	40	HIV-positive	TBM	Alive	60	4693.23	586.56		752.647	1286.68	1.27373e+06	317397	27934.6	421.976	838595	1.13294e+06	3105.2	0.725637	0.226072	0.0250828	4.55735	0.166504	0.12706
Male	44	HIV-positive	TBM	Alive	60	5281.96	847.253		538.421	1085.27	1.46479e+06	423375	3420.72	358.106	598445	481076	1098.33	1.28632	0.167074	0.0301106	6.16041	0.0511615	0.0866601
Male	39	HIV-positive	TBM	Dead	50	1608.83	746.81		281.35	1618.49	960972	133013	12069.9	62.4353	2.74595e+06	169219	1025.77	1.07029	0.0962759	0.0168523	1.76833	0.0918575	0.44793
Male	33	HIV-positive	TBM	Alive	60	4779.81	578.892			1596.76	380037	127139	7424.74	481.541	140769	1.4182e+06	3843.78	0.709147	0.0187913	0.00156472	1.67948	0.0700011	0.00966613
Female	53	HIV-positive	TBM	Alive	60	6082.98	679.336		681.238	1486.63	876723	371135	175609	107.647	1.63088e+06	782662	1506.2	0.925176	0.206406	0.0146352	5.37021	0.86134	0.260344
Male	33	HIV-positive	TBM	Alive	60	5011.68	1100.28		689.808	1118.6	1.4426e+06	434055	9889.04	394.706	598104	192793	1332.05	1.83052	0.208766	0.0295266	6.32195	0.0815962	0.0866026
Male	30	HIV-positive	TBM	Alive	60		443.179		1705.24	788.235	66653	22323.8	148758	177.259	714794	93520.6	58.812	0.41726	0.488419		0.0940171	0.735002	0.106233
Female	31	HIV-positive	TBM	Alive	60	574.42	779.78			2080.71	146235	57272.6	16112.5	120.565	73896.8	585183	1367.19	1.1412	0.0187913		0.62266	0.110879
Male	35	HIV-positive	TBM	Alive	60	369.647	846.486		868.329	2156.06	3.33405e+06	621623	7223.23	766.447	868649	153236	1317.92	1.28467	0.257932	0.0793011	9.15913	0.069053	0.132116
Male	25	HIV-positive	TBM	Alive	60	2366.19	583.493		254.215	1341.74	225895	153617	192416	139.941	516841	710811	891.727	0.719041	0.0888028		2.07999	0.940419	0.072932
Male	35	HIV-positive	TBM	Dead	2	197.245	2112.38			2053.18	690794	724487	229208	125.588	795732	1.37986e+06	3103.29	4.0073	0.0187913	0.00974246	10.7151	1.11354	0.119849	320			762656	4397		1104136	8582	835530	608	4031622	190250	364885
Male	20	HIV-positive	TBM	Alive	60		1199.96			1249.01	627153	43004.8	432079	474.365	1.25346e+06	152310	1106.73	2.0449	0.0187913	0.00806769	0.406842	2.06808	0.196852
Male	32	HIV-positive	TBM	Alive	60	127.231	936.196			1666.31	699721	80947.4	55801.7		212622	118364	707.653	1.47762	0.0187913	0.00997737	0.98077	0.297624	0.0217538	206	1735		118149	3067		2741645	18885	829683	699	5744579	726187	147862
Male	28	HIV-positive	TBM	Alive	60	48.182	928.528		381.322	1357.68	4.64691e+06	1.11653e+06	59473.1	208.835	1.98143e+06	206361	11797.9	1.46113	0.123809	0.11385	16.6452	0.314899	0.319316	1158			422840	5414		762480	5908	612879	259	4399983	263946	74494
Male	41	HIV-positive	TBM	Alive	60		1180.79		474.153	4286.03	4.50427e+06	1.04399e+06	46869.1	28.7059	791181	137806	10277.6	2.00367	0.149375	0.110096	15.548	0.255594	0.119084	353	4590		59176	2449	317	2887516	23478	920983	4461	3618081	3768676	297855
Female	32	HIV-positive	TBM	Alive	60	154.333	1331.07		1381.04	733.175	1.03973e+07	661058	23662.6	65.3059	1.96085e+06	619302		2.32689	0.399135	0.265175	9.75564	0.146403	0.315855	173			2212092	18520		1463687	7472	621096	708	5373918	1188055	178396
Male	34	HIV-positive	TBM	Alive	60	158.85	910.126			2354.56	900237	280611	14130.2	45.2118	499173	198300	2053.07	1.42155	0.0187913	0.015254	4.00092	0.101552	0.0699597
Male	31	HIV-positive	TBM	Alive	60	295.115	860.288		218.51	1041.8	2.05457e+06	399670	19072.3	119.129	278934	219205	1635.66	1.31436	0.0789697	0.0456308	5.80183	0.124805	0.0329095	334	816		3869453	5027		3177314	10578	851487	2022	4114121	1071442	213271
Male	34	HIV-positive	TBM	Alive	60	1692.39	986.034		819.771	3048.62	2.10914e+06	556951	40163.6	177.259	744122	272704	918.46	1.58481	0.244559	0.047067	8.18089	0.224044	0.111167
Male	23	HIV-positive	TBM	Alive	60	146.052	746.81	149.816		2496.56	300668	421907	116443	36.6	762337	7.74809e+06	288.713	1.07029	0.0187913		6.13819	0.582955	0.114231
Male	30	HIV-positive	TBM	Dead	44	174.66	276.795		895.464	1150.48	341800	615597	49737.3	156.447	1.90723e+06	420213	15637.9	0.0594098	0.265405	0.000558485	9.06799	0.26909	0.306834	1123	2141		1814806	7405	22	858654	9964	1035229	1245	8171885	465996	1382312
Male	34	HIV-positive	TBM	Dead	6	3691.95	430.911			2489.32	829420	113554	24505.2		131120	317343	381.896	0.390875	0.0187913	0.0133904	1.47398	0.150368	0.00804303	5210	2002		161854	4567	183	2841746	28725	553179	596	3345265	137261	354245
Female	44	HIV-positive	TBM	Alive	60	5283.46	1473.68		516.999	1275.09	318482	493004	175099	70.3294	361761	54416.3	3416.06	2.63362	0.161174		7.21362	0.858941	0.0468432				232059	4035	372	229830	7226	785028	148	2371589	81064	63818
Male	28	HIV-positive	TBM	Alive	60		1854.76	1362.04		820.112	5.30749e+06	710192	1.0037e+06	87.5529	1.68243e+06	222506	1418.74	3.45321	0.0187913	0.131233	10.4989	4.75769	0.269016
Male	36	HIV-positive	TBM	Alive	60	1642.71	504.518		395.604	1337.39	1.85866e+06	335772	61264.4	109.8	697239	134273	465.149	0.549186	0.127742	0.0404755	4.83529	0.323327	0.10328
Male	40	HIV-positive	TBM	Alive	60	1766.17	1055.04		1086.84	1359.13	1.1592e+06	255815	65786.2	81.0941	320650	511313	230.665	1.73322	0.31811	0.0220686	3.62584	0.344603	0.0399272
Male	36	HIV-positive	TBM	Alive	60	109.162	879.457			3154.39	2.49324e+06	561816	21016	96.8824	137856	368775	3882.74	1.35559	0.0187913	0.0571746	8.25448	0.133951	0.00917619
Female	32	HIV-positive	TBM	Alive	60	126.478	540.555			1114.25	462443	263777	288125	33.7294	1.18349e+06	507346	295.969	0.626693	0.0187913	0.00373327	3.74629	1.39075	0.185082
Male	34	HIV-positive	TBM	Alive	60		791.281		154.243	734.624	365257	87224.1	28849.6	277.012	452188	1.22774e+06	309.336	1.16594	0.0612702	0.00117577	1.07571	0.170809	0.0620555
Male	49	HIV-positive	TBM	Alive	60		664.001		419.883	662.176	346142	128331	50365	214.576	242041	320176		0.892194	0.134428	0.000672771	1.6975	0.272043	0.0267029
Male	45	HIV-positive	TBM	Alive	60		1411.58			1315.66	421564	504454	960911	706.882	561929	1.09346e+06	795.871	2.50005	0.0187913	0.00265753	7.38681	4.55634	0.080517
Male	48	HIV-positive	TBM	Dead	4	274.035	680.87		241.361	1679.35	735826	82463.2	42927.7	61.7176	372812	324058	379.987	0.928474	0.0852629	0.0109275	1.0037	0.23705	0.0487022
Male	34	HIV-positive	TBM	Alive	60		2741.88	1353.48	448.446	1879.3	3.48747e+06	1.10118e+06	705018	109.8	444988	1.46513e+06	10594.9	5.3612	0.142295	0.0833382	16.413	3.35232	0.0608443
Male	39	HIV-positive	TBM	Alive	60	1398.78	1387.04		442.734	1031.66	296929	112028	41963.6	154.294	665007	89189.1	350.199	2.44727	0.140721		1.45091	0.232513	0.0978577
Male	28	HIV-positive	TBM	Dead	14	246.18	637.165			3264.51	316739	61551.2	145437	38.0353	520408	502346	342.943	0.834476	0.0187913		0.687379	0.719374	0.0735321
Male	36	HIV-positive	TBM	Dead	46		764.445			830.255	732295	90430	14615.2	109.8	701811	356188	231.047	1.10822	0.0187913	0.0108345	1.12421	0.103834	0.104049
Male	34	HIV-positive	TBM	Dead	14	5621.49	970.699		287.063	963.56	1.61679e+06	879272	101387	124.153	404148	796028	1101.77	1.55183	0.0978492	0.0341105	13.0564	0.51211	0.0539738
Female	26	HIV-positive	TBM	Dead	53	19.574	696.204		809.774	1830.04	1.09351e+06	253493	400646	49.5176	364115	713664		0.961455	0.241805	0.0203402	3.59074	1.92018	0.0472391
Male	34	HIV-positive	TBM	Alive	60	1035.16	680.87		576.982	2102.44	1.15322e+06	115345	10802.1	153.576	362512	375868	568.261	0.928474	0.177694	0.0219115	1.50108	0.0858922	0.0469696
Male	35	HIV-positive	TBM	Alive	60	75.2844	490.717		287.063	1428.68	238728	41228.2	20266.9	96.8824	87732.5	211279	1738.39	0.519503	0.0978492		0.379969	0.130426	0.000743991
Male	35	HIV-positive	Cryptococcal meningitis	Follow-up < 60 days	4	706.921	727.641		274.209	1666.31	436855	52887.3	32940.3	49.5176	480461	309024	821.458	1.02907	0.0943093	0.00305991	0.556327	0.190057	0.0668118
Male	37	HIV-positive	TBM	Alive	60	1693.9	433.978			1199.74	271189	137582	52567.1	326.529	449592	407804	690.468	0.397471	0.0187913		1.83744	0.282405	0.0616188
Male	41	HIV-positive	TBM	Alive	60	19.574	1088.78		394.176	1556.19	1.55955e+06	487885	19755.9		864441	450202	8142.02	1.80578	0.127348	0.0326043	7.13619	0.128022	0.131408
Male	30	HIV-positive	TBM	Alive	60	2081.61	1280.46		689.808	766.501	758294	217200	50895.3	124.153	773378	2.87088e+06	16313.1	2.21805	0.208766	0.0115187	3.04176	0.274538	0.116089
Male	39	HIV-positive	TBM	Alive	60	1671.31	957.665			1070.78	442524	138617	39426	130.612	94933.3	318667	1062.05	1.52379	0.0187913	0.00320909	1.8531	0.220573	0.00195535
Male	36	HIV-positive	TBM	Alive	60	2388.02				1173.66	170230	84410	8966.37	67.4588	1.06334e+06	334485	2342.55		0.0187913		1.03315	0.0772548	0.164868
Male	38	HIV-positive	TBM	Dead	47	6005.44	956.898		764.073	3364.49	363913	249615	58581.3	35.1647	1.09268e+06	715286	467.823	1.52214	0.229219	0.00114041	3.53207	0.310703	0.169804
Male	40	HIV-positive	TBM	Alive	60	2784.02	559.724		655.531	1021.52	668047	174059	97319.9	99.7529	976823	1.36981e+06	1034.56	0.66792	0.199327	0.00914386	2.3892	0.492975	0.150314
Male	43	HIV-positive	TBM	Alive	60	7840.87			2153.68	934.58	594633	300717	70192.2	283.471	291917	512513	213.48		0.611922	0.00721191	4.30506	0.365335	0.0350935
Male	30	HIV-positive	TBM	Alive	60	9982.71	570.458		1733.8	1062.09	223471	330809	24075.2	231.8	2.47195e+06	2.07818e+06	4314.66	0.691007	0.496285		4.76023	0.148345	0.401836
Male	27	HIV-positive	TBM	Dead	16	244.674	1410.04		1216.8	1935.81	675818	124918	46586.6	65.3059	1.38687e+06	301310		2.49675	0.353902	0.00934834	1.64588	0.254265	0.219296	356			1624666	5098	18	635874	6380	624687	875	5414241	118034	115156
Male	31	HIV-positive	TBM	Dead	5	162.614	787.447			631.747	827317	409498	15294.9	101.906	632632	207546	274.583	1.1577	0.0187913	0.0133351	5.95049	0.107032	0.0924113	422	680		404478	106340		973246	8873	682454	240	4614279	127619	103079
Male	33	HIV-positive	TBM	Dead	9	274.788	958.431		391.319	2369.05	567978	184597	222579	88.9882	898270	764425	1829.66	1.52544	0.126562	0.00651048	2.54859	1.08234	0.137099
Male	28	HIV-positive	TBM	Dead	19	1028.39	930.828			1047.6	1.47486e+06	200917	21685.1	127.024	153918	1.30464e+06	1246.13	1.46607	0.0187913	0.0303755	2.79545	0.137099	0.0118783
Male	42	HIV-positive	TBM	Alive	60	420.087	1198.42		1052.56	876.622	868148	235200	907663	61.7176	306588	65341.4	1468.01	2.0416	0.30867	0.0144096	3.31402	4.3058	0.0375616	138	886		20961	4419		584225	10743	784428	271	995936	86101	196077
Male	30	HIV-positive	TBM	Dead	17	471.281	710.006		662.672	1138.88	2.00786e+06	359546	133611	129.176	624846	1.25896e+06	1550.5	0.991139	0.201293	0.0444017	5.19491	0.66373	0.0911015	175	2387		1278049	8516		544984	3114	741206	951	3909751	2037039	96639
Male	33	HIV-positive	TBM	Dead	7	9336.02	1327.24		916.887	1308.41	1.72797e+06	487222	131830	303.565	398620	508417	1089.93	2.31865	0.271305	0.0370361	7.12616	0.655351	0.0530439
Male	33	HIV-positive	TBM	Dead	36		20824	2657.3		1433.02	1.51211e+06	181402	3.97224e+06	94.7294	771426	789970		44.2514	0.0187913	0.0313558	2.50026	18.7253	0.11576
Female	38	HIV-positive	TBM	Dead	11	94.1055	1544.99		912.603	1057.74	1.10953e+06	162642	16876.1	146.4	369125	193045		2.78698	0.270125	0.0207616	2.2165	0.114471	0.048082
Male	35	HIV-positive	TBM	Alive	60	64.7446	706.172		287.063	1082.37	1.30115e+06	600289	57302.8	38.7529	476850	371803	2198.96	0.982893	0.0978492	0.0258044	8.83644	0.304687	0.0662043
Male	30	HIV-positive	TBM	Dead	17	2180.24	953.831		461.3	1022.97	617910	275396	93858.7	67.4588	739179	285295	564.061	1.51555	0.145835	0.00782447	3.92204	0.47669	0.110335
Male	34	HIV-positive	TBM	Dead	12	82.8129	1084.94	85.609		1422.88	531469	535679	206519	40.9059	869346	585315	7155.97	1.79754	0.0187913	0.00554972	7.85914	1.00678	0.132233
Male	24	HIV-positive	TBM	Alive	60	222.842	727.641		821.199	469.464	671235	26967.2	327207	153.576	234269	290408	952.449	1.02907	0.244952	0.00922773	0.164253	1.57464	0.0253956
Female	29	HIV-positive	TBM	Dead	54	5705.81	695.438		1071.13	2383.54	618907	319995	164368	93.2941	398672	163396	859.266	0.959806	0.313784	0.00785069	4.59665	0.80845	0.0530527
Male	34	HIV-positive	TBM	Alive	60	234.135	3069.28		565.556	943.274	1.09849e+06	275719	17383.2	113.388	559931	173831	3822.02	6.06535	0.174547	0.0204712	3.92692	0.116858	0.0801809
Male	34	HIV-positive	TBM	Dead	2	9080.81			389.891	2060.42	1.75343e+06	487033	82023	92.5765	64245.7	248555	13774.2		0.126168	0.0377061	7.1233	0.421001
Female	19	HIV-positive	TBM	Dead	2	957.618	1294.27		267.068	673.767	3.32475e+06	341997	6543.52	44.4941	168531	477951	1954.54	2.24774	0.0923427	0.0790563	4.92946	0.0658549	0.0143366
Male	31	HIV-positive	TBM	Alive	60	174.66	1971.3	773.049		1360.58	2.39118e+06	1.08095e+06	112325	170.082	164354	387026	4881.4	3.70387	0.0187913	0.0544888	16.1069	0.563575	0.0136339
Female	33	HIV-positive	TBM	Alive	60	3427.7	1778.08		696.948	2621.17	4.16305e+06	1.99632e+06	455355	326.529	454234	174668	639.294	3.2883	0.210733	0.101116	29.9531	2.1776	0.0623998
Female	36	HIV-positive	TBM	Dead	3	152.827	884.057			1524.31	443232	120407	288869	161.471	1.6419e+06	1.65984e+06	1111.7	1.36548	0.0187913	0.00322774	1.57765	1.39425	0.262197
Female	28	HIV-negative	TBM	Alive	60	1181.21	481.516		284.206	2203.87	1.11604e+06	99669.5	17214.5	196.635	302135	311159	1196.48	0.499714	0.0970626	0.0209329	1.26396	0.116064	0.0368124	117			3134291	20903		801013	2029	580709	3782	7815518	2894955	68890
Female	79	HIV-negative	TBM	Alive	60		926.228		992.58	1980.73	436847	62623.9	2.03609e+06	63.8706	541409	79266.1	2569.4	1.45618	0.292151	0.00305971	0.703605	9.61527	0.077065
Male	33	HIV-negative	TBM	Alive	60		1216.06			3332.61	762754	84874.8	8952.88	152.859	535830	224719	3885.03	2.07953	0.0187913	0.0116361	1.04018	0.0771913	0.0761264	6265			553968	14131	104	2798513	14904	1078222	555	7201086	118530	111195
Female	24	HIV-negative	TBM	Alive	60	172.401	953.831			1220.03	1.90115e+06	234435	10498.4		2.35763e+06	1.01987e+06	765.702	1.51555	0.0187913	0.0415936	3.30245	0.0844632	0.382604	499			1078018	57639		1260972	6830	1133682	3364	4383831	3911902	102107
Male	58	HIV-negative	TBM	Alive	60	135.512	729.175			1069.33	538430	167723	123886	30.1412	664277	370870	826.423	1.03237	0.0187913	0.00573292	2.29336	0.617976	0.0977347
Male	21	HIV-negative	TBM	Alive	60	129.489	555.89			1050.5	613876	91832.4	3924.96	195.2	585788	125730	327.285	0.659674	0.0187913	0.00771832	1.14542	0.053534	0.0845307
Female	43	HIV-negative	TBM	Alive	60		1425.38		594.12	950.519	5.44413e+06	1.08902e+06	50731.4	393.988	650475	1.00136e+06	6615.97	2.52973	0.182414	0.134829	16.2291	0.273767	0.0954129		1723		4898977	4739		1039634	2313	459561	13780	8931534	3065861	65005
Female	66	HIV-negative	TBM	Alive	60	220.583	479.216	100.162	811.202	1606.9	803137	365956	615655	421.976	764885	385073	3286.6	0.494766	0.242199	0.0126988	5.29186	2.93185	0.11466	602	1839		2074998	14607		1580195	3159	445496	9933	9157552	1440193	237837
Male	25	HIV-negative	TBM	Alive	60		525.22		192.803	982.396	546586	70286.7	19139.8	47.3647	946459	762169	565.588	0.593711	0.0718899	0.00594754	0.819514	0.125123	0.145206
Male	42	HIV-negative	TBM	Alive	60	8997.24	740.676		412.742	1149.03	765023	252846	244088		613215	428913	323.466	1.0571	0.132462	0.0116958	3.58095	1.18355	0.0891447	266	425		1917210	6682		1142096	3989	664017	17041	7859260	103863	241866
Male	18	HIV-negative	TBM	Alive	60	61.7332	907.826		345.618	1199.74	1.75272e+06	196853	10559.1	45.9294	425636	423723	1128.5	1.4166	0.113975	0.0376875	2.73398	0.084749	0.0575888	352	521		1380530	6610	19	2516559	2575	935900	1274	4552779	1977465	294733
Female	55	HIV-negative	TBM	Alive	60	3274.12	429.377		209.941	996.886	460699	118352	34705.7	88.9882	377170	198994	2507.53	0.387576	0.0766098	0.00368738	1.54656	0.198363	0.0494354	821			812137	4205		978756	3828	644750	3304	4941379	1935316	91616
Female	25	HIV-negative	TBM	Alive	60	346.308	397.941		245.646	1273.64	984049	228916	58299.8	44.4941	1.48967e+06	182973	1382.85	0.319964	0.0864428	0.0174596	3.21898	0.309378	0.236589
Male	40	HIV-negative	TBM	Alive	60	2713.25	970.699		291.347	1692.39	692519	49865.1	14346.2	116.976	346920	1.44549e+06	612.179	1.55183	0.0990292	0.00978784	0.510613	0.102568	0.0443466	280	1130		2755138	20737		1765272	3588	514309	4047	3225893	2236169	383039
Male	27	HIV-negative	TBM	Alive	60	2488.15	625.664		197.088	2028.55	461876	212244	63384.6	56.6941	1.74759e+06	695953	619.435	0.80974	0.0730699	0.00371836	2.96678	0.333303	0.279978	858	1171		1635695	6554		1239425	6550	992190	1063	3815902	2349524	98658
Male	39	HIV-negative	Cryptococcal meningitis	Alive	60		496.851			1969.14	284486	82383.5	32124.7	350.929	729999	313132	350.581	0.532695	0.0187913		1.00249	0.186219	0.108791
Male	74	HIV-negative	TBM	Alive	60		407.142			3447.08	102629	6894.12	255184	421.259	27502.5	351573	383.424	0.339753	0.0187913			1.23576
Male	68	HIV-negative	TBM	Alive	60	1002.79	939.263		409.886	2150.26	961385	225379	89031.3	88.2706	574354	359862	620.963	1.48421	0.131675	0.0168632	3.16548	0.453976	0.0826072	1538	2310		153535	5745		1055881	6128	740300	795	1178321	2219699	181741
Female	23	HIV-negative	TBM	Alive	60	135.512	1303.47		562.7	1496.78	4.62508e+06	111208	53793.4	63.1529	168851	499328	2588.87	2.26753	0.173761	0.113275	1.4385	0.288175	0.0143904	267			3092597	4371		1816090	2969	535034	8847	6754441	3140888	243331
Male	18	HIV-negative	TBM	Alive	60	1927.28	949.997		329.908	828.806	1.49107e+06	91235.2	3066.89	144.247	1.2771e+06	388706	1322.12	1.5073	0.109649	0.0308021	1.13639	0.0494966	0.200829	114	393		2620356	4869		836648	6502	712199	3689	4026922	764023	53920
Male	69	HIV-negative	TBM	Alive	60		798.182		268.497	723.032	293193	50971.6	234466	91.1412	75911.5	467261	395.262	1.18078	0.092736		0.527349	1.13827		478	1493		248044	8492		1893895	10409	727433	536	1824903	365369	198808
Female	40	HIV-negative	TBM	Alive	60	3623.44	1166.99		1006.86	1196.84	3.28404e+06	229866	7383.28	58.1294	559120	713756	2361.26	1.97399	0.296084	0.077985	3.23334	0.0698061	0.0800444
Male	49	HIV-negative	TBM	Alive	60	335.769	462.347		187.091	1938.71	498503	199446	18888.2	40.9059	446964	225266	1290.04	0.458487	0.0703166	0.0046822	2.7732	0.123939	0.0611767	947	2182		772623	5526		2969521	7136	477374	5129	9216426	1306947	315090
Male	31	HIV-negative	TBM	Alive	60	943.314	271.428			3494.9	414305	28295.2	1851.12	94.0118	51532.8	231252	1388.57	0.0478663	0.0187913	0.0024665	0.184341	0.0437762		650	875		22204	4480		1892595	10513	768781	335	1225048	1699038	334436
Male	39	HIV-negative	TBM	Alive	60		1406.21		212.798	1076.58	1.33009e+06	285527	25119.3	110.518	1.17691e+06	580275	1327.09	2.4885	0.0773964	0.0265659	4.07528	0.153258	0.183974	1488	1226		69368	6536		798945	9320	726078	449	1146468	1143443	191821
Female	33	HIV-negative	TBM	Alive	60	1398.78	836.519		485.579	825.908	1.81504e+06	247506	13689.6	188.024	316301	189266	4613.3	1.26324	0.152521	0.0393276	3.50017	0.0994787	0.0391955
Male	47	HIV-negative	TBM	Alive	60	664.761	1220.66		237.077	962.111	1.40732e+06	245397	21048.8		1.46429e+06	786345	1725.41	2.08942	0.0840829	0.0285983	3.46827	0.134105	0.23232	521	410		1560110	5210	22	1265125	5837	737933	848	4675789	1217125	292987
Male	32	HIV-negative	TBM	Alive	60	1128.51	714.606		235.649	1179.46	1.21131e+06	296275	31546.2	53.8235	184793	317467	7577.2	1.00103	0.0836896	0.02344	4.23786	0.183497	0.0170723	281			62940	8464		771130	6376	758331	470	733488	147704	68162
Male	49	HIV-negative	TBM	Alive	60	2408.35	946.163		1495.3	392.669	1.48023e+06	560303	370630	163.624	1.28013e+06	307721	1458.08	1.49905	0.4306	0.0305167	8.23159	1.77895	0.201338
Male	22	HIV-negative	TBM	Alive	60	3996.85	554.357		277.066	1283.78	1.72381e+06	415488	69042	449.965	988544	1.3608e+06	3938.49	0.656376	0.0950959	0.0369268	6.0411	0.359923	0.152285	346	664		1794844	6403		843084	4809	508485	10121	7625754	527239	132423
Male	46	HIV-negative	TBM	Alive	60	4377.04	1097.21		485.579	1395.35	1.85635e+06	312363	14772.3	375.329	1.04119e+06	550626	375.786	1.82392	0.152521	0.0404147	4.48121	0.104573	0.161141	203	746		1867290	8778		1010401	2916	588606	582	4446541	345827	115829
Male	22	HIV-negative	TBM	Alive	60	514.193	738.375		309.914	873.724	2.37211e+06	122028	50160.6	91.8588	1.17659e+06	139937	299.407	1.05215	0.104142	0.0539871	1.60217	0.271082	0.18392
Male	27	HIV-negative	TBM	Alive	60	12260.1	849.553		352.759	949.07	2.91492e+06	459696	6280.32	109.8	550185	583200	1027.3	1.29127	0.115942	0.0682713	6.70979	0.0646164	0.0785413
Male	26	HIV-negative	TBM	Alive	60	5121.6	542.089			2989.21	796848	296340	10650.7	35.1647	1.24103e+06	875781	282.603	0.629991	0.0187913	0.0125333	4.23885	0.0851799	0.19476	449			2024552	6245		2269960	5529	1210352	1611	5975104	3167624	490804
Male	40	HIV-negative	TBM	Alive	60	902.66	624.897			1302.62	515246	97645.7	25664.1	80.3765	1.41523e+06	150634	413.593	0.808091	0.0187913	0.00512281	1.23335	0.155821	0.224065	291	191		1766069	5037	26	1266563	8225	709668	6477	4024074	89046	169972
Female	57	HIV-negative	TBM	Alive	60	1544.84	571.225		264.212	1419.98	412573	107466	57863	55.2588	881114	154521	641.585	0.692656	0.091556	0.00242092	1.3819	0.307323	0.134213
Female	26	HIV-negative	TBM	Alive	60	3126.56	581.959			4403.4	691388	130972	10306.5	109.8	1.2674e+06	140581	786.706	0.715743	0.0187913	0.00975807	1.73745	0.0835604	0.199196	1122			1707650	17430		989366	9675	677487	3674	3626014	180876	67455
Female	37	HIV-negative	TBM	Alive	60		766.745			1038.91	47956.4	1042.97	83530.9	143.529	3.52638e+06	4.12005e+06	331.104	1.11317	0.0187913			0.428096	0.579219
Male	18	HIV-negative	TBM	Alive	60	5224.74	543.622		437.021	1141.78	857457	270931	46776.5	58.8471	975284	293022	1728.46	0.633289	0.139148	0.0141283	3.8545	0.255159	0.150055
Male	43	HIV-negative	TBM	Alive	60	10704.7	675.502		719.799	1096.86	2.01924e+06	304535	109260	349.494	768550	259705	1470.68	0.91693	0.217026	0.0447011	4.36281	0.549154	0.115276
Male	50	HIV-negative	TBM	Alive	60		834.985		339.905	1333.04	1.14712e+06	83417	118568	48.8	2.30521e+06	540684	1281.26	1.25994	0.112402	0.0217509	1.01813	0.592953	0.373786
Male	20	HIV-negative	TBM	Alive	60	703.157	434.744		204.229	1717.02	553080	104102	26885.6	69.6118	1.06154e+06	183045	755.772	0.39912	0.0750365	0.00611842	1.33101	0.161568	0.164566
Male	62	HIV-negative	TBM	Alive	60		465.414			1534.45	3195.26			368.871	85672.3		264.272	0.465083	0.0187913			0.0350663	0.000397397
Female	19	HIV-negative	TBM	Alive	60	959.124	825.018			2206.77	1.0971e+06	150244	15659.3	193.047	553422	292601	2818.78	1.2385	0.0187913	0.0204345	2.02896	0.108747	0.0790859
Female	62	HIV-negative	TBM	Alive	60	5437.79	4443.29		1368.19	2542.93	2.11102e+06	238489	353750	91.1412	1.22593e+06	1.02471e+06		9.0205	0.395595	0.0471163	3.36378	1.69953	0.19222
Male	48	HIV-negative	TBM	Alive	60		693.904			1128.74	80260.3	4333.98	212078	58.8471	865586	293687	306.663	0.956508	0.0187913			1.03293	0.131601
Female	70	HIV-negative	TBM	Alive	60	8752.57	1020.54		958.304	1057.74	1.08123e+06	501582	41200	76.0706	1.33502e+06	682901	797.017	1.65902	0.282711	0.0200171	7.34337	0.22892	0.210572
Female	21	HIV-negative	TBM	Alive	60	377.928	564.324		268.497	1049.05	608701	100541	16477.9		742763	1.80164e+06	9703.6	0.677814	0.092736	0.00758213	1.27714	0.112598	0.110938
Male	41	HIV-negative	TBM	Alive	60	799.521	331.234			1201.19	483241	122108	28272	104.059	240822	675692	894.783	0.176494	0.0187913	0.00428059	1.60337	0.168092	0.0264979
Male	41	HIV-negative	TBM	Alive	60	5234.53	656.334		632.681	1133.09	1.41543e+06	299402	14680.8	1620.45	1.06548e+06	302343	1329.76	0.875703	0.193033	0.0288117	4.28515	0.104142	0.165229
Female	56	HIV-negative	TBM	Dead	44		368.038		459.872	1370.72	251351	47830.5	97779.8	122	630892	242093	821.077	0.25565	0.145441		0.479837	0.495139	0.0921185
Male	39	HIV-negative	TBM	Alive	60	2140.34	567.391			1144.68	3.77421e+06	436527	41462.3	970.976	2.48163e+06	1.58631e+06	268.473	0.68441	0.0187913	0.090884	6.35934	0.230154	0.403464
Female	39	HIV-negative	TBM	Alive	60	1076.57	702.338			1577.92	903357	89119.6	4296.15		175052	361060	1489.39	0.974648	0.0187913	0.0153361	1.10438	0.0552805	0.0154335
Female	66	HIV-negative	TBM	Alive	60	308.666	1162.39		1255.36	1034.56	5.45588e+06	621359	214340	60.2824	898644	872606	1891.91	1.96409	0.364522	0.135138	9.15515	1.04358	0.137162
Male	47	HIV-negative	TBM	Alive	60		591.927		185.662	1162.07	247424	174883	1.73482e+06	88.2706	431721	307686	965.051	0.737181	0.0699233		2.40166	8.19774	0.0586124
Male	56	HIV-negative	TBM	Dead	53	240.157	413.276			1677.9	237818	31695.6	82467.5	95.4471	298274	155484	1116.28	0.352946	0.0187913		0.235777	0.423092	0.0361628
Male	58	HIV-negative	TBM	Alive	60	7012.74	306.698			1093.97	659123	277484	263872	68.8941	1.13436e+06	282424	723.693	0.123724	0.0187913	0.00890902	3.95363	1.27663	0.176815
Male	23	HIV-negative	TBM	Alive	60	470.528	546.689			2897.92	2.00325e+06	116572	25601.4	63.1529	736725	96250.9	257.78	0.639885	0.0187913	0.0442803	1.51963	0.155526	0.109922
Female	66	HIV-negative	TBM	Alive	60		556.657		564.128	978.049	136287	4001.64	116724	195.918	27689.8	292481	442.999	0.661323	0.174154			0.584275
Female	48	HIV-negative	TBM	Alive	60	117.444	1002.9		184.234	1770.63	2.10732e+06	717353	717871	90.4235	689384	1.5789e+06	4365.84	1.62109	0.0695299	0.0470189	10.6072	3.41279	0.101959
Male	61	HIV-negative	TBM	Dead	8	88.0828	483.816		144.245	978.049	183680	27117.1	1.0142e+06	63.1529	661619	883562	1927.43	0.504661	0.0585169		0.166522	4.80708	0.0972876
Male	24	HIV-negative	TBM	Alive	60	639.165	479.982			1089.62	466315	25221.7	10986.2	75.3529	983152	630630	821.458	0.496415	0.0187913	0.00383516	0.137851	0.0867586	0.151378
Male	26	HIV-negative	TBM	Alive	60	109.915	460.814			1585.16	122896	25269	52652.9		612086	455502	681.685	0.455189	0.0187913		0.138566	0.282808	0.0889548
Male	63	HIV-negative	TBM	Alive	60	3180.77	2093.21		1702.38	1693.84	3.48129e+06	486672	193707	131.329	952526	844235	4509.05	3.96608	0.487632	0.0831757	7.11784	0.946498	0.146226
Male	64	HIV-negative	TBM	Alive	60	28619.4	1120.98			2032.89	702303	728050	182095	88.9882	2.27622e+06	2.40013e+06	1956.84	1.87504	0.0187913	0.0100453	10.769	0.891861	0.368908
Male	58	HIV-negative	TBM	Alive	60	2935.34	629.498			1376.51	1.80276e+06	129972	21014.1	184.435	317220	725171	1312.19	0.817986	0.0187913	0.0390043	1.72233	0.133942	0.0393501
Female	20	HIV-negative	TBM	Alive	60	3795.09	1025.9		311.342	2234.3	794112	267030	26737.1		896818	445967	530.454	1.67056	0.104536	0.0124613	3.7955	0.16087	0.136855
Male	63	HIV-negative	TBM	Alive	60	4066.11	620.297			4100.56	514263	418570	253524	84.6824	588399	1.26765e+06	732.095	0.798197	0.0187913	0.00509695	6.08772	1.22795	0.08497
Female	66	HIV-negative	TBM	Alive	60	6192.14	505.285		541.278	891.112	1.1878e+06	126928	1921.5	25.8353	800922	668004	2255.86	0.550835	0.167861	0.0228213	1.67629	0.0441074	0.120722
Male	28	HIV-negative	TBM	Alive	60	753.597	456.213			5393.04	713220	127469	44327.6	132.047	591785	899544	367.002	0.445294	0.0187913	0.0103326	1.68446	0.243637	0.0855396
Male	25	HIV-negative	TBM	Alive	60	5467.91	1318.03		594.12	1372.17	2.07071e+06	333299	10341.2	147.118	874858	801510	2038.94	2.29886	0.182414	0.0460555	4.7979	0.0837238	0.13316
Male	51	HIV-negative	TBM	Alive	60	2836.72	811.983		262.784	1748.9	405818	76902.6	54699.7	111.953	663633	514408	1579.9	1.21047	0.0911627	0.00224317	0.919586	0.292439	0.0976265
Female	36	HIV-negative	TBM	Alive	60	2048.49	1001.37		511.286	1809.75	1.86692e+06	187987	29241	79.6588	1.23965e+06	1.08357e+06	2157.33	1.61779	0.159601	0.0406927	2.59987	0.172651	0.194528
Male	55	HIV-negative	TBM	Alive	60	452.459	664.001		1102.55	931.683	927643	331162	39524.4	66.0235	1.08272e+06	1.52642e+06	1312.19	0.892194	0.322437	0.0159752	4.76557	0.221036	0.168128
Male	82	HIV-negative	TBM	Alive	60		740.676		825.484	2218.36	174667	12273.8	167949		121444	460765	892.491	1.0571	0.246132			0.825299	0.0064152
Female	71	HIV-negative	TBM	Alive	60		1060.41		705.517	1050.5	3.72514e+06	242803	56333.9	68.1765	3.67766e+06	3.15238e+06	2289.09	1.74477	0.213093	0.0895927	3.42903	0.300128	0.604669
Female	33	HIV-negative	TBM	Alive	60	6350.24	897.092		301.344	2080.71	2.88918e+06	222149	4147.67	109.082	683213	1.57518e+06	2245.17	1.39351	0.101782	0.0675939	3.11662	0.0545819	0.10092
Male	41	HIV-negative	TBM	Alive	60	8242.89	1273.56		2066.57	1221.47	1.29533e+06	469365	127113	141.376	876965	478062	1181.97	2.20321	0.58793	0.025651	6.85605	0.633159	0.133515
Male	70	HIV-negative	TBM	Alive	60	107.657	692.371		374.181	1060.64	314523	52940	1.06532e+06	211.706	684656	344642	513.65	0.95321	0.121842		0.557124	5.04762	0.101163
Female	44	HIV-negative	TBM	Alive	60	6055.13	810.449		405.601	499.892	577608	177860	27852.6	188.741	542080	1.72483e+06	3432.86	1.20717	0.130495	0.00676389	2.44668	0.166118	0.0771778
Female	49	HIV-negative	TBM	Alive	60	755.856	497.618		132.82	1709.78	462588	67053.8	17942.4	129.894	795457	549094	418.176	0.534344	0.0553703	0.0037371	0.770612	0.119489	0.119803
Male	22	HIV-negative	TBM	Alive	60	7314.63	455.447		441.305	1070.78	494997	228376	128106	98.3176	1.10819e+06	2.00636e+06	1084.97	0.443645	0.140328	0.00458995	3.2108	0.637832	0.172414
Female	63	HIV-negative	TBM	Alive	60	1789.51	821.184		158.527	825.908	1.69253e+06	368591	16089.3	81.0941	658321	246210	1277.06	1.23026	0.0624501	0.0361036	5.33173	0.11077	0.0967328
Male	53	HIV-negative	TBM	Alive	60	10393	742.209			1086.72	1.48799e+06	196280	9944	156.447	112312	260517	6357.04	1.0604	0.0187913	0.0307211	2.72532	0.0818548	0.00487895
Female	44	HIV-negative	TBM	Alive	60	3688.94	1821.79		347.046	925.887	1.42997e+07	329621	32677.1		510308	933499	837.88	3.3823	0.114369	0.367867	4.74225	0.188819	0.0718329
Female	34	HIV-negative	TBM	Alive	60	10094.9	673.202		719.799	914.295	2.35438e+06	193697	6195.48	48.8	637566	878487	538.473	0.911983	0.217026	0.0535205	2.68625	0.0642172	0.0932413
Female	23	HIV-negative	TBM	Alive	60	5848.09	1649.27			2312.54	2.47819e+06	267459	3930.74		257796	314562	298.643	3.01126	0.0187913	0.0567786	3.80198	0.0535612	0.0293534
Female	61	HIV-negative	TBM	Alive	60		2084.01			2325.58	4.34409e+06	385323	115752	134.918	352438	4.10158e+06	17636.3	3.94629	0.0187913	0.105881	5.58482	0.579702	0.0452748	1111	1458		1492152	7526	321	2659438	13009	714723	2173	5068457	2517699	201648
Male	22	HIV-negative	TBM	Alive	60		541.322		277.066	1160.62	1.09643e+06	208391	119242		676412	733315	6077.11	0.628342	0.0950959	0.0204169	2.9085	0.596124	0.0997763	359	869		1380046	11262	33	1703093	8879	1097538	2907	4230045	1343549	135383
Female	81	HIV-negative	TBM	Dead	21	447.189	412.509		572.697	1327.25	100589	16267.3	372984	22.9647	567817	189604	345.616	0.351297	0.176514		0.00240522	1.79003	0.0815075
Male	53	HIV-negative	Non-infectious control	Follow-up < 60 days	47		544.389		402.745	1044.7	282933	11247	273826	58.8471	1.24029e+06	960861	824.896	0.634938	0.129708			1.32347	0.194636
Male	28	HIV-negative	TBM	Alive	60	3831.22	934.662		328.48	820.112	3.05604e+06	245539	20793.3	69.6118	570150	322627	2019.47	1.47432	0.109256	0.071985	3.47041	0.132903	0.0819	233	471		5704162	4535		2589913	8918	996020	911	5561973	198445	945484
Female	31	HIV-negative	TBM	Alive	60	292.856	1913.8		421.311	1292.47	3.13934e+06	335685	12036.2	262.659	413871	571519	4855.04	3.58019	0.134822	0.074177	4.83398	0.0916988	0.0556095	138	445		3323852	5732		1086599	3722	504955	988	8261703	257257	210474
Male	40	HIV-negative	TBM	Alive	60	721.225	560.491		765.501	3689.06	4.56434e+06	190451	33338.5	89.7059	2.14371e+06	1.03434e+06	953.213	0.669569	0.229612	0.111677	2.63714	0.191931	0.346616
Female	50	HIV-negative	TBM	Alive	60	648.199	671.669			1147.58	1.64732e+06	128716	56609.6	147.835	1.62834e+06	587439	661.062	0.908685	0.0187913	0.034914	1.70332	0.301426	0.259916
Male	77	HIV-negative	TBM	Alive	60	397.502	595.761			1054.84	419463	51718.7	22096.8	53.8235	581886	873806	1039.9	0.745426	0.0187913	0.00260223	0.53865	0.139036	0.0838744
Female	48	HIV-negative	TBM	Alive	60	563.88	1032.04			2058.97	1.06444e+06	583286	73743.1	253.329	359739	303514	7516.1	1.68375	0.0187913	0.0195752	8.57924	0.382042	0.046503	588			794993	3945	151	2645797	23233	835602	1008	4812801	294618	100248
Female	38	HIV-negative	TBM	Alive	60	21219.7	1282.76		926.884	807.072	2.99672e+06	251404	20362.3	17.2235	561735	353967	1763.98	2.223	0.274058	0.0704241	3.55912	0.130875	0.0804844		399		733545	53311		536560	3722	447033	501	3022617	1081431	45471
Female	38	HIV-negative	TBM	Alive	60	3113.76	485.35		409.886	1377.96	667608	124629	71045.5	64.5882	3.18173e+06	1.33343e+06	1494.36	0.507959	0.131675	0.0091323	1.64151	0.369349	0.521241	86			1038177	21605		725300	4493	695182	1675	3599718	1274168	103295
Male	76	HIV-negative	TBM	Dead	3	1587	786.68		319.911	646.237	1.44204e+06	147119	87067.4		1.35387e+06	216806	2908.14	1.15605	0.106896	0.0295118	1.9817	0.444735	0.213744	2579	1517		2170172	5775		4559630	11283	1157515	1276	7671371	1431836	139859
Female	74	HIV-negative	TBM	Dead	11	11709.7	1358.67		692.664	1499.68	716148	235016	160358	25.8353	1.17523e+06	617729	790.525	2.38626	0.209553	0.0104097	3.31124	0.789584	0.183691
Female	22	HIV-negative	TBM	Alive	60	12235.2	517.553		748.363	1047.6	1.67273e+06	476002	6617.76	143.529	905434	265776	2720.25	0.57722	0.224893	0.0355826	6.95645	0.0662042	0.138304
Male	71	HIV-negative	TBM	Alive	60	5161.5	1186.92		688.379	1169.31	3.66079e+06	546431	16852	138.506	1.17795e+06	283471	1444.71	2.01687	0.208373	0.0878995	8.02176	0.114358	0.184148				660333	4982		1670565	9905	921705	2178	3486625	653905	251268
Male	32	HIV-negative	TBM	Alive	60	1315.97	3658.14	1015.32		1031.66	1.00642e+07	581329	776262		227893	593998	4622.09	7.33184	0.0187913	0.256409	8.54965	3.68753	0.0243228				1851420	12377		598857	3649	925768	1090	4809346	1375979	136485
Male	39	HIV-negative	TBM	Alive	60	652.716	671.669		375.609	1204.09	1.129e+06	548186	49874.3	58.8471	1.46776e+06	518128	540.383	0.908685	0.122235	0.021274	8.04831	0.269734	0.232903	1212	3781		1315979	8449		1431939	4775	590754	4145	4464664	1513827	305981
Female	51	HIV-negative	TBM	Alive	60	5035.78	1570.29		1352.48	992.539	1.21943e+06	334015	459360	79.6588	728235	159892	7881.57	2.8414	0.391268	0.0236537	4.80873	2.19644	0.108494
Female	83	HIV-negative	TBM	Dead	28	1548.6	429.377		282.778	1009.93	900213	36790.2	2834.53	122	284483	232517	280.312	0.387576	0.0966692	0.0152534	0.312839	0.0484033	0.033843	786			203079	4559	98	907625	15246	668732	347	2764498	3235477	19817
Male	44	HIV-negative	TBM	Dead	13		241.525			4459.9	139729	28019.6	58680.6	188.024	410088	862122	913.114		0.0187913		0.180173	0.31117	0.0549731
Female	67	HIV-negative	TBM	Dead	11	480.315	711.539		371.325	2319.79	204589	42176.6	353623	204.529	990927	1.08336e+06	715.291	0.994437	0.121055		0.394315	1.69893	0.152686
Male	36	HIV-negative	TBM	Alive	60	1870.07	1482.88		601.261	957.764	1.90322e+06	645658	216320	188.024	1.52381e+06	229187	775.631	2.65341	0.18438	0.0416481	9.5227	1.05289	0.242333	708	283		550745	6006		1054904	11124	1182084	1956	3044823	123579	106268
Female	30	HIV-negative	TBM	Alive	60		827.318			1060.64	98280.8	29954.2	192178	68.1765	883521	57842.2	1446.62	1.24345	0.0187913		0.209436	0.939303	0.134618	186	631		13947	4506		1334907	5342	553845	172	697092	108935	91570
Male	51	HIV-negative	TBM	Alive	60	3521.81	647.133			4058.54	375329	123329	23189.2	160.035	356599	819499	581.246	0.855914	0.0187913	0.00144084	1.62185	0.144176	0.0459747	543			1782814	6215		1677759	6767	666480	1808	6059870	252803	174522
Female	28	HIV-negative	TBM	Alive	60	121.961	463.881			14323	116615	29193.6	19502.3	73.9176	563534	227554	184.074	0.461785	0.0187913		0.197931	0.126829	0.0807871
Female	59	HIV-negative	TBM	Alive	60		1063.48		185.662	1379.41	1.02145e+06	139102	2.84276e+06	124.871	1.81331e+06	443852	268.473	1.75136	0.0699233	0.0184438	1.86043	13.4108	0.291033	204			983328	9702		1506242	5418	854764	508	4023966	1848593	135523
Male	50	HIV-negative	TBM	Alive	60	1321.99	540.555		682.667	746.215	820331	383651	57515	66.7412	720939	1.0012e+06	3847.6	0.626693	0.2068	0.0131513	5.55952	0.305685	0.107267	213			2069940	7471		1442139	3257	797329	740	5481894	430117	346960
Female	68	HIV-negative	TBM	Alive	60	6563.3	995.235		539.849	857.785	815252	219978	93197.3	253.329	265832	479772	1476.79	1.6046	0.167467	0.0130176	3.08378	0.473578	0.0307053	304	572		1118562	112722		3318708	8594	862928	1061	6324250	99329	270050
Male	74	HIV-negative	TBM	Dead	48	4883.7	966.865		586.979	2082.16	2.24019e+06	335500	27166.2	86.8353	701020	112028	1610.46	1.54358	0.180447	0.0505156	4.83119	0.162889	0.103916
Male	46	HIV-negative	TBM	Dead	23	3038.48				7391.15	471407	209092	199382	47.3647	895197	537314	430.779		0.0187913	0.00396916	2.91911	0.973199	0.136582	753	1701		3919477	36281	116	1927199	7440	1139920	3465	5545694	1587129	156325
Female	71	HIV-negative	TBM	Alive	60	249.191	406.375		258.499	857.785	1.49426e+06	232141	193208	180.129	599640	371132	1256.06	0.338104	0.0899827	0.030886	3.26776	0.944148	0.086861
Male	58	HIV-negative	TBM	Dead	14	326.734	402.541		789.78	980.947	1.0033e+06	6988.68	64744.9	245.435	377170	1.5347e+06	6556.01	0.329859	0.236299	0.0179661		0.339704	0.0494354	205			68547	7602		3682959	6606	720524	695	862070	446706	235091
Male	64	HIV-negative	TBM	Alive	60	98.6226	532.121			2182.14	115259	21988.8	249966	43.7765	835592	260431	777.159	0.608553	0.0187913		0.0889491	1.21121	0.126555
Male	42	HIV-negative	TBM	Alive	60	1212.83	481.516			1302.62	1.5591e+06	351616	29869.6	46.6471	1.72335e+06	1.28322e+06	458.275	0.499714	0.0187913	0.0325924	5.07496	0.175609	0.2759
Female	20	HIV-negative	TBM	Alive	60	3237.23	498.384		359.9	1208.43	843277	262936	10529.2	230.365	740792	204446	1853.72	0.535993	0.117909	0.0137551	3.73356	0.0846084	0.110607
Male	45	HIV-negative	TBM	Alive	60	24670	1208.39		599.833	992.539	1.9164e+06	943021	57797.4	314.329	423736	928853	2247.84	2.06304	0.183987	0.0419948	14.0207	0.307015	0.0572691
Male	60	HIV-negative	TBM	Dead	4	1550.11	853.387			707.093	500158	78838.5	40192.5	177.976	843968	199684	2122.58	1.29952	0.0187913	0.00472578	0.94887	0.22418	0.127964
Male	58	HIV-negative	TBM	Alive	60	161.862	771.345		222.795	1459.1	1.57116e+06	141495	164079	170.082	459424	506123	1031.88	1.12307	0.0801497	0.0329096	1.89662	0.80709	0.0632729
Female	53	HIV-negative	TBM	Alive	60	414.817	1401.61			3234.08	2.93579e+06	248927	7655.16	65.3059	253635	1.22717e+06	2198.58	2.47861	0.0187913	0.0688206	3.52167	0.0710853	0.0286534
Female	35	HIV-negative	TBM	Alive	60	1874.58	1017.47			1854.67	2.74033e+06	274300	50484.5	109.082	831588	597972	419.322	1.65242	0.0187913	0.0636769	3.90546	0.272606	0.125881
Female	23	HIV-negative	TBM	Alive	60	6947.25	821.184		1009.72	1919.87	773423	265796	14463.8	29.4235	878466	311260		1.23026	0.296871	0.0119169	3.77682	0.103121	0.133767
Male	36	HIV-negative	TBM	Alive	60		580.426		556.987	744.766	413179	392027	5.81038e+06	114.824	834991	2.11988e+06	593.467	0.712445	0.172187	0.00243686	5.68622	27.374	0.126454
Male	66	HIV-negative	TBM	Alive	60		2959.64	2033.21		1564.88	4.46013e+06	315801	946982	134.2	3.70035e+06	896608	11539.4	5.82953	0.0187913	0.108934	4.53322	4.4908	0.608486
Female	47	HIV-negative	TBM	Alive	60	1081.84	1383.97		477.01	1253.35	3.32151e+06	321155	5456.95	50.9529	100722	174798	2562.52	2.44068	0.150161	0.078971	4.6142	0.0607423	0.00292918
Female	32	HIV-negative	TBM	Alive	60	1687.12	586.56		212.798	1275.09	255434	176236	120224	539.671	265590	2.41416e+06	353.254	0.725637	0.0773964		2.42212	0.600742	0.0306645
Male	54	HIV-negative	TBM	Alive	60	7546.51	1202.26		504.145	883.867	567030	190860	74493.2	412.647	470709	2.73995e+06	1371.77	2.04985	0.157634	0.00648554	2.64333	0.385571	0.0651712
Male	31	HIV-negative	TBM	Alive	60		417.876			4383.11	25090.7	3581.48	165511	53.8235	918782	152813	344.088	0.36284	0.0187913			0.813826	0.14055
Female	52	HIV-negative	TBM	Alive	60	8582.42	1331.07		578.41	8020	1.7836e+06	281132	24700	921.459	201575	169267	3660.86	2.32689	0.178087	0.0385002	4.0088	0.151284	0.0198955
Male	77	HIV-negative	TBM	Alive	60	4643.54	1042.77		1411.03	1115.7	2.35547e+06	253922	63647.8	1310.42	1.91198e+06	664835	1747.17	1.70684	0.407394	0.0535493	3.59721	0.334541	0.307633
Male	38	HIV-negative	TBM	Alive	60	162.614	542.089		629.824	776.644	119729	20748.5	379518	204.529	683799	1.41815e+06	231.047	0.629991	0.192247		0.0701894	1.82077	0.101019
Female	26	HIV-negative	TBM	Alive	60	4779.81	723.807		895.464	1392.45	707061	309207	94717.7	109.082	686206	813504	897.838	1.02082	0.265405	0.0101705	4.43347	0.480732	0.101424
Female	29	HIV-negative	TBM	Alive	60	3682.91	917.794		681.238	1050.5	756004	188232	66814.9	40.9059	311658	562245	288.713	1.43804	0.206406	0.0114585	2.60358	0.349444	0.0384145
Male	41	HIV-negative	TBM	Alive	60	319.206	719.974			4597.56	251739	68679.1	301027		1.88031e+06	289579	327.667	1.01258	0.0187913		0.795196	1.45146	0.302306
Male	58	HIV-negative	TBM	Alive	60	733.27	628.731			1354.78	1.51284e+06	242055	95603.7	94.0118	1.20458e+06	658648	300.552	0.816337	0.0187913	0.031375	3.41771	0.484901	0.188628
Female	21	HIV-negative	TBM	Alive	60	2172.71	582.726		601.261	2702.31	1.71161e+06	367902	36917.4		169227	187517	621.345	0.717392	0.18438	0.0366057	5.32131	0.20877	0.0144536
Male	87	HIV-negative	TBM	Alive	60		962.265		606.974	2611.03	462697	22667	452818	426.282	833624	1.0865e+06	700.779	1.53369	0.185954	0.00373997	0.0992077	2.16567	0.126224
Male	61	HIV-negative	TBM	Alive	60	3389.3	609.562		725.512	1686.59	673254	166371	49246.6		1.53095e+06	2.01397e+06	4072.54	0.77511	0.218599	0.00928088	2.2729	0.266781	0.243533
Male	31	HIV-negative	TBM	Alive	60	1517.73	568.925		327.052	1777.88	312314	136625	57621		235636	261300	743.17	0.687709	0.108862		1.82295	0.306184	0.0256254
Female	76	HIV-negative	TBM	Alive	60	2117	812.75		586.979	1144.68	1.02702e+06	115818	34105	111.235	299506	1.39753e+06	416.267	1.21212	0.180447	0.0185905	1.50823	0.195537	0.0363702
Female	18	HIV-negative	TBM	Alive	60	124.972	573.525		278.494	802.725	162886	55566.3	110436	78.2235	1.58766e+06	247824	741.642	0.697603	0.0954893		0.59685	0.554689	0.253073
Male	51	HIV-negative	TBM	Alive	60	2642.48	702.338		269.925	1130.19	5.54939e+06	315280	93924.2	119.847	2.0019e+06	982442	350.963	0.974648	0.0931293	0.137599	4.52533	0.476998	0.32276
Male	84	HIV-negative	TBM	Dead	7	43.665	722.274		451.303	2908.07	278231	9051.65	405938	84.6824	950678	2.65327e+06	805.037	1.01752	0.143081			1.94508	0.145915
Female	74	HIV-negative	TBM	Alive	60	8135.99	1317.27		764.073	2579.15	6.16797e+06	668109	22623.2	35.1647	1.68082e+06	793069	596.904	2.29721	0.229219	0.153877	9.8623	0.141513	0.268745
Female	76	HIV-negative	TBM	Dead	6	61.7332	482.283		831.197	3580.38	1.65986e+06	174229	43675.9	98.3176	1.09824e+06	552190	1914.83	0.501363	0.247705	0.035244	2.39177	0.24057	0.170739
Male	52	HIV-negative	TBM	Alive	60	457.729	631.798		258.499	860.683	251487	63042.7	76829.3	59.5647	1.00027e+06	664003	1046.4	0.822933	0.0899827		0.70994	0.396563	0.154258
Female	75	HIV-negative	TBM	Alive	60		784.38			1244.66	464982	70428.6	26369.8	87.5529	643506	140913	304.753	1.1511	0.0187913	0.00380008	0.82166	0.159141	0.0942406
Female	51	HIV-negative	TBM	Dead	24	114.432	439.345			598.421	112391	47298.3	44056.7		879380	366130	341.797	0.409014	0.0187913		0.471786	0.242362	0.133921
Male	70	HIV-negative	TBM	Alive	60	304.149	2955.04		2360.77	1208.43	4.99183e+06	804268	76216.1		135497	388715	4177.18	5.81964	0.668954	0.122926	11.9219	0.393678	0.00877932
Female	35	HIV-negative	TBM	Alive	60	201.009	593.461			2222.71	239507	79072.2	193709	58.8471	1.00857e+06	700038	1406.14	0.740479	0.0187913		0.952406	0.946507	0.155654
Male	31	HIV-negative	TBM	Alive	60	843.186	944.63		585.551	1034.56	1.06867e+06	291464	298538	170.082	1.10905e+06	783265	795.108	1.49576	0.180054	0.0196863	4.16509	1.43975	0.172558
Female	49	HIV-negative	TBM	Alive	60	27264.3	2330.14		4294.52	1127.29	5.60048e+06	1.02037e+06	26065.2	307.871	1.24886e+06	1.82794e+06	2040.47	4.47564	1.20151	0.138943	15.1907	0.157708	0.196077
Male	20	HIV-negative	TBM	Alive	60		567.391		532.709	1178.01	177317	30995.8	194888	63.1529	32984.6	84688.4	1045.25	0.68441	0.165501		0.225192	0.95205
Male	60	HIV-negative	TBM	Alive	60	7027.05	891.724		804.061	1391	3.87216e+06	221775	90006	431.306	561545	890679	1338.55	1.38197	0.240232	0.0934617	3.11095	0.458562	0.0804524
Male	77	HIV-negative	TBM	Alive	60	8059.95	1191.52		552.703	569.442	4.73299e+06	236253	25501.1	73.9176	493532	294606	787.47	2.02676	0.171007	0.116115	3.32996	0.155054	0.0690107
Male	27	HIV-negative	TBM	Alive	60	1498.91	525.22		956.876	928.785	1.15868e+06	471511	41765.9	38.0353	844079	289378	4222.63	0.593711	0.282318	0.022055	6.88852	0.231583	0.127982
Female	58	HIV-negative	TBM	Alive	60				321.339	1243.21	3.41276e+06	356392	12001.4	178.694	991924	642340	3615.79		0.107289	0.0813722	5.1472	0.0915354	0.152854	416	4423		93712	6176	54	3378252	10690	489845	1175	1878018	2821910	184870
Female	20	HIV-negative	TBM	Alive	60	183.694	1215.29		988.296	2526.99	2.39054e+06	1.28058e+06	53848.4		337737	145328	14003.4	2.07788	0.290971	0.0544721	19.1267	0.288433	0.0428017	1346	1167		317675	3155	40	3936395	17122	1003867	2168	3548302	936856	189142
Male	18	HIV-negative	TBM	Alive	60	4938.66	614.929			1218.58	762457	334664	150081		566735	1.11817e+06	652.66	0.786653	0.0187913	0.0116283	4.81854	0.741225	0.0813255
Male	72	HIV-negative	TBM	Dead	9	1711.21	501.451			5027.9	897344	223304	7355.32	227.494	1.24452e+06	464548	929.535	0.54259	0.0187913	0.0151779	3.13409	0.0696745	0.195347	1277	2190		465116	12914	152	3113731	9097	132069	1892	2287937	412965	35736
Female	54	HIV-negative	TBM	Follow-up < 60 days	57	450.201	1350.24		1182.53	959.213	1.16729e+06	197230	22385.1	119.129	922002	269706	472.787	2.36812	0.344463	0.0222817	2.73968	0.140393	0.141091	335			2930284	4293	24	873215	4973	528772	1845	6423385	137264	90151
Female	78	HIV-negative	TBM	Dead	35	14118.1	907.826		244.218	867.928	1.30558e+06	477475	257432	58.1294	682854	862151	260.835	1.4166	0.0860495	0.0259209	6.97872	1.24634	0.10086	179	1221		1666368	8005		704738	4583	572684	1596	4197230	389911	89662
Male	50	HIV-negative	TBM	Dead	5	715.202	1332.6		211.37	1570.67	7.15433e+06	389152	5358.61	97.6	304941	471236	989.111	2.33019	0.0770031	0.179833	5.64274	0.0602796	0.0372844	1324			1389446	4802		14173418	10794	626040	1235	9670678	5046012	821058
Male	56	HIV-negative	TBM	Alive	60	460.741	469.248		327.052	925.887	314201	99622.2	140637	17.2235	660442	58106.6	279.548	0.473328	0.108862		1.26325	0.696791	0.0970897	278	927		1151055	27883		2592598	7272	907332	509	4111118	1677358	326978
Male	44	HIV-negative	TBM	Alive	60		489.183		368.469	1089.62	434771	110991	122802	148.553	727749	110354	1202.97	0.516204	0.120269	0.00300508	1.43521	0.612872	0.108413	585			1563773	21983	18	1861703	4485	829549	977	7110645	589572	241079
Male	41	HIV-negative	TBM	Dead	2	285.328	686.237			2392.24	6.48418e+06	123633	16578.2	155.729	313239	205814	1026.54	0.940017	0.0187913	0.162198	1.62645	0.11307	0.0386804
Male	55	HIV-negative	TBM	Dead	2		765.978		254.215	1241.76	36967.3	4516.37	261049	65.3059	242633	146331	1721.59	1.11152	0.0888028			1.26335	0.0268025	324			1222519	4226		1117804	4124	755180	2781	5440640	164757	93221
Female	18	HIV-negative	TBM	Alive	60	4420.7	589.627		501.289	1447.51	310084	109878	114058	74.6353	699006	248920	691.614	0.732234	0.156848		1.41837	0.571732	0.103577	218	914	113	1024194	4235		1406867	6931	874089	4779	4067164	2000527	93807
Male	21	HIV-negative	TBM	Alive	60	64.7446	543.622		205.657	2586.4	1.0268e+06	223885	75225	103.341	671917	94837.6	2405.95	0.633289	0.0754298	0.0185847	3.14287	0.389015	0.0990201	231			1700427	4602		2312253	7296	1260324	7191	5201247	110930	164908
Female	35	HIV-negative	TBM	Dead	2	85.8242	653.267			723.032	166117	24231.4	154420	45.2118	123461	869069	1074.27	0.869107	0.0187913		0.122872	0.761644	0.00675445	407	1275		253591	4084		1796131	9552	1374789	595	3790617	2627798	311930
Female	36	HIV-negative	TBM	Alive	60	846.197	1125.58		749.791	2124.18	1.03543e+06	185187	26730.4	55.2588	1.28369e+06	1.53475e+06	1012.41	1.88494	0.225286	0.0188116	2.55752	0.160838	0.201938	245			1767955	5105		1101210	4101	882615	1333	5867423	718479	219108
Male	52	HIV-negative	TBM	Dead	8	152.075	607.262			1140.33	246639	44157.2	111385	92.5765	1.19603e+06	267046	710.327	0.770162	0.0187913		0.424273	0.559152	0.187191
Female	26	HIV-negative	TBM	Alive	60	707.674	580.426		655.531	1351.88	765893	134070	14833.1		873059	339410	870.723	0.712445	0.199327	0.0117187	1.78431	0.104859	0.132858
Female	29	HIV-negative	TBM	Alive	60		604.195		258.499	883.867	464647	87278.2	177071		575182	211103	689.322	0.763566	0.0899827	0.00379127	1.07653	0.868222	0.0827465	490			2164093	5115		1807288	4657	621187	6944	5825736	1027192	92528
Female	52	HIV-negative	TBM	Alive	60	256.72	2048.74		1452.45	2476.28	4.88473e+06	547792	10815.6	129.176	66344.8	578908	8108.42	3.87043	0.418801	0.120108	8.04236	0.0859557		1155	1048	75	1093859	4559	137	4412599	8602	578098	623	5038881	1471483	325751
Male	64	HIV-negative	TBM	Alive	60	1905.45	413.276		558.416	1076.58	511645	287699	232166	50.2353	991611	703147	1215.58	0.352946	0.172581	0.00502806	4.10814	1.12745	0.152802	1562	1480		2007662	11116	40	2021547	7434	825656	18186	11272741	2375379	241524
Male	43	HIV-negative	TBM	Alive	60	1564.41	956.131		421.311	1286.68	1.07684e+06	313667	80086.1	68.8941	466444	333324	2229.13	1.52049	0.134822	0.0199016	4.50093	0.411887	0.0644537	405	1162	323	823550	38771	56	4884632	7955	857297	2552	1003292	142181	345732
Female	70	HIV-negative	TBM	Alive	60	4186.57	853.387			2919.66	854027	183490	80592.3	79.6588	740361	150105	662.59	1.29952	0.0187913	0.014038	2.53186	0.414269	0.110534	214			456376	9043		4501373	3859	929429	1820	3271796	108133	321288
Male	18	HIV-negative	TBM	Alive	60	5057.61	769.812		227.079	1070.78	707829	253506	116206	54.5412	904876	308016	791.289	1.11977	0.0813296	0.0101907	3.59092	0.581839	0.13821
Female	47	HIV-negative	TBM	Dead	32	1846.73	719.207			1153.37	4.66091e+06	589292	26277.3	115.541	551186	590389	825.659	1.01093	0.0187913	0.114218	8.6701	0.158706	0.0787098
Male	37	HIV-negative	TBM	Alive	60	914.706	830.385			1117.15	2.73305e+06	191171	10114.6	50.2353	1.30013e+06	174556	907.767	1.25004	0.0187913	0.0634854	2.64803	0.0826577	0.204703
Male	34	HIV-negative	TBM	Alive	60	4627.73	1026.67		359.9	1599.65	654882	222529	27112.2	67.4588	699089	744544		1.67221	0.117909	0.0087974	3.12236	0.162634	0.103591
Male	55	HIV-negative	TBM	Dead	7	12009.4	1347.94		662.672	1020.07	1.61414e+06	626311	70631.9	107.647	484185	257386	8783.99	2.36317	0.201293	0.0340406	9.23005	0.367403	0.0674382
Male	19	HIV-negative	TBM	Alive	60	1801.56	1355.61		874.042	1522.86	1.33311e+06	463417	298965	94.7294	1.0308e+06	140765		2.37966	0.259505	0.0266452	6.76609	1.44175	0.159393
Male	32	HIV-negative	TBM	Alive	60	1746.6	311.298		264.212	453.525	787188	360438	45455.7		232567	125972	714.909	0.133618	0.091556	0.0122791	5.2084	0.248944	0.0251092
Male	38	HIV-negative	TBM	Alive	60	11945.4	866.422		976.87	1579.37	2.27591e+06	479489	17156.6		865481	455056	3150.64	1.32755	0.287824	0.0514556	7.00919	0.115792	0.131583
Male	28	HIV-negative	TBM	Alive	60	2651.52	658.634		881.183	1320	1.64989e+06	359290	38755.9	81.0941	882553	408809	728.658	0.880651	0.261472	0.0349816	5.19103	0.217421	0.134455
Male	36	HIV-negative	TBM	Follow-up < 60 days	1	1297.9	420.176		589.835	1253.35	908418	404320	47672.2	69.6118	1.35627e+06	311482	3326.7	0.367787	0.181234	0.0154693	5.87216	0.259373	0.214148
Male	82	HIV-negative	TBM	Alive	60	264.248	1071.91		675.526	1001.23	1.61122e+06	117178	177697	53.8235	1.09784e+06	245531	1077.33	1.7695	0.204833	0.033964	1.52881	0.871166	0.170672
Male	43	HIV-negative	TBM	Dead	1	12731.3	1189.99		792.636	3596.32	1.72689e+06	497499	119755	224.624	611966	925651	659.916	2.02346	0.237086	0.0370079	7.28161	0.598537	0.0889345
Male	35	HIV-positive	TBM	Dead	31	141.535	1070.38			5511.85	727628	93794	103090	128.459	135533	1.84989e+06	1231.61	1.76621	0.0187913	0.0107117	1.17509	0.520126	0.00878536	677	227		58616	12415	37	540383	5995	1058433	92	953734	2786102	40308
Male	46	HIV-positive	TBM	Alive	60	51.1934	1495.92			365.138	795234	166707	5291.12	68.1765	70856.4	291909	5285.06	2.68144	0.0187913	0.0124908	2.27799	0.0599621		399	1406		663778	84259	67	1295647	10367	568860	795	2621004	241233	98879
Male	33	HIV-positive	TBM	Alive	60		1786.52		758.36	510.035	1.59972e+06	121265	5917.81	147.835	185366	482887	2298.63	3.30644	0.227646	0.0336613	1.59062	0.0629107	0.0171686		3577		1069218	58283		1131795	4636	608799	1447	3820698	11633126	77432
Female	35	HIV-positive	TBM	Alive	60	849.208	1328		484.151	1896.69	968169	495224	155038	104.776	123898	2.10511e+06	2270.75	2.3203	0.152128	0.0170417	7.2472	0.764552	0.00682807	154	2207		20820	15015		596969	12335	869997	310	2983287	7039089	203068
Male	29	HIV-positive	TBM	Alive	60		948.464		314.198	1033.11	470195	154485	475828	72.4824	494613	354128	2759.2	1.504	0.105322	0.00393726	2.09311	2.27393	0.0691926	146	513		416303	20615		224102	21131	1618728	721	2539415	137490	198718
Female	28	HIV-positive	TBM	Alive	60		665.535		268.497	883.867	101267	76039.3	1.04735e+06	109.8	94143.3	154180	3320.2	0.895492	0.092736		0.906528	4.96306	0.00182246		1289		30182	3798	70	181328	7162	703873	202	1779490	151752	31835
Male	37	HIV-positive	TBM	Alive	60	356.095	935.429		512.714	738.971	1.24797e+06	279811	44951.4	59.5647	191623	1.18708e+06	7612.72	1.47597	0.159994	0.0244048	3.98882	0.246572	0.0182213	154	591		862501	4221		1353069	5661	780905	488	2257482	444286	193721
Male	29	HIV-positive	TBM	Alive	60	879.322	889.424		297.06	902.703	1.22885e+06	151808	3092.92	155.012	139564	660605	4067.96	1.37702	0.100602	0.0239018	2.05263	0.0496191	0.00946353	2729			70174	6105	142	2254364	33908	678940	502	2229172	337650	90113
Male	30	HIV-positive	TBM	Alive	60		887.891		327.052	1567.78	335829	49331.5	39310.3	63.1529	415380	553001	14123.7	1.37372	0.108862	0.000401357	0.502541	0.220029	0.0558633	72	317		177512	6729		724026	4550	852960	117	854106	171790	228246
Male	39	HIV-positive	TBM	Alive	60	338.78	779.78			2547.28	1.2126e+06	256645	12400.6	65.3059	31072.8	328334	3268.27	1.1412	0.0187913	0.023474	3.63841	0.0934135		1187			128614	7583		1713569	11725	1030831	182	1217597	161480	210209
Male	32	HIV-positive	TBM	Alive	60	784.464	1342.57		544.134	1214.23	700101	339621	7849.92	29.4235	64310.7	1.69386e+06	928.771	2.35163	0.168647	0.00998737	4.89351	0.0720017		323	790		344367	7578		318350	8250	729783	95	1020668	1629080	184187
Male	31	HIV-positive	TBM	Dead	22	965.146	789.747			6350.8	921218	167034	22895.1	162.188	122274	67366.3	2748.12	1.16264	0.0187913	0.0158062	2.28293	0.142792	0.00655478	807			308305	11418		2286773	16819	1017300	185	3866338	9658773	321309
Male	35	HIV-positive	TBM	Alive	60	2297.68	1006.74			2344.42	596823	185987	50400.7	70.3294	212859	1.71372e+07	2641.58	1.62933	0.0187913	0.00726956	2.56962	0.272211	0.0217938	994			168211	7204		1408083	10265	778660	370	4746412	21056512	57173
Male	28	HIV-positive	TBM	Alive	60	488.596	539.022		328.48	792.582	373578	172184	55553.9	196.635	40554.1	3.53717e+06	577.809	0.623394	0.109256	0.00139474	2.36083	0.296458
Female	32	HIV-positive	TBM	Alive	60	1151.85	1071.91		488.435	999.784	829322	174858	8557.58	388.965	149163	5.09293e+06	2279.54	1.7695	0.153308	0.0133879	2.40127	0.0753314	0.0110783				949668	5191		366807	7141	483771	326	1903227	372458	51647
Female	29	HIV-positive	TBM	Dead	28	393.738	650.2			1588.06	252862	258481	36392.9		45319	604564	1369.1	0.862511	0.0187913		3.66618	0.206302
Male	35	HIV-positive	TBM	Alive	60	1300.16	864.122			2650.15	300116	204367	120178	50.2353	649150	296109	145.884	1.3226	0.0187913		2.84764	0.600529	0.0951901
Male	33	HIV-positive	TBM	Alive	60	1255.74	712.306		361.328	911.397	529234	156236	128601	43.0588	186354	1.32182e+06	568.643	0.996086	0.118302	0.00549091	2.11959	0.640159	0.0173349
Female	39	HIV-positive	TBM	Alive	60	102.387	1603.26		514.142	525.973	1.57718e+06	111181	23308.7	91.1412	78958.7	714663	14040.8	2.91231	0.160388	0.0330681	1.43809	0.144738
Female	50	HIV-positive	TBM	Alive	60	551.835	422.476			1703.98	1.65131e+06	55835.2	27482.4		350397	1.10954e+06	2240.58	0.372735	0.0187913	0.0350188	0.600917	0.164376	0.0449315
Male	30	HIV-positive	TBM	Alive	60	1030.64	687.77		454.159	715.787	610767	348479	147126	24.4	166501	161794	4868.79	0.943316	0.143868	0.00763649	5.02751	0.727321	0.013995
Male	42	HIV-positive	TBM	Alive	60			1786.66		1344.64	2.30398e+06	402372	375555	88.9882	73204.9	329677	8456.71		0.0187913	0.0521942	5.8427	1.80213
Male	29	HIV-positive	TBM	Alive	60	493.866	571.225		261.356	1166.41	495188	52479.3	2643.63	38.7529	27554	487702	368.912	0.692656	0.0907694	0.00459498	0.550155	0.0475051
Male	42	HIV-positive	TBM	Alive	60	3970.5	1026.67		394.176	1664.86	909056	299812	9493.75	158.6	59926.2	686425	546.111	1.67221	0.127348	0.0154861	4.29136	0.0797363
Male	32	HIV-positive	TBM	Alive	60	1526.77	644.066			880.969	700991	152542	6998.59	104.776	43260.7	461048	683.976	0.849318	0.0187913	0.0100108	2.06372	0.0679961
Male	43	HIV-positive	TBM	Alive	60	237.146	692.371			3057.31	335799	121693	18430.2	55.9765	57111	8.50938e+06	700.397	0.95321	0.0187913	0.000400571	1.5971	0.121784
Male	35	HIV-positive	TBM	Alive	60	968.911	879.457		604.117	1675	696676	287156	33032.9	104.059	96950.8	126779	393.353	1.35559	0.185167	0.00989722	4.09993	0.190493	0.00229477
Female	27	HIV-positive	TBM	Alive	60	627.872	499.918		381.322	1689.49	631400	35644.6	1758.57	137.071	221130	146635	1797.97	0.539292	0.123809	0.00817946	0.29551	0.0433407	0.0231851
Male	29	HIV-positive	TBM	Alive	60	84.3186	707.706		564.128	1134.54	835305	79295.2	15397.1	96.8824	126664	660758	701.925	0.986192	0.174154	0.0135453	0.955777	0.107513	0.00729336
Male	41	HIV-positive	TBM	Alive	60	180.683	752.177		382.75	1051.95	425070	37056.4	5321.98	177.259	534407	272325	1265.22	1.08184	0.124202	0.00274979	0.316865	0.0601072	0.0758871
Male	32	HIV-positive	TBM	Alive	60	1299.41	1288.13			849.092	193603	356100	122962	86.8353	52700.3	345512	2729.41	2.23454	0.0187913		5.14278	0.613626
Male	35	HIV-positive	TBM	Alive	60	801.026	693.137		311.342	1128.74	247630	131537	80626	129.894	108739	4.41102e+06	641.585	0.954859	0.104536		1.74599	0.414428	0.00427784
Male	34	HIV-positive	TBM	Alive	60	23579.1	1149.35		675.526	1320	1.97912e+06	508682	26849	41.6235	43081.2	383270	681.685	1.93606	0.204833	0.0436454	7.45078	0.161396
Male	37	HIV-positive	TBM	Alive	60	2503.21			168.524	1627.18	305147	272633	44688.2	119.129	109582	1.66826e+06	1477.17		0.0652034		3.88024	0.245333	0.00441971
Male	31	HIV-positive	TBM	Dead	27	2081.61	898.625			2455.99	617038	97909.1	114013	77.5059	193256	1.42796e+06	1168.98	1.39681	0.0187913	0.00780151	1.23734	0.571519	0.018496
Male	53	HIV-positive	TBM	Dead	25		459.28		222.795	1696.73	80379.4	7784.42	164473	193.047	129063	1.57127e+06	387.625	0.45189	0.0801497			0.808945	0.00769693
Male	23	HIV-positive	TBM	Alive	60		724.574			753.46	154948	14213.8	262932	108.365	838219	1.17266e+06	515.178	1.02247	0.0187913			1.27221	0.126997
Female	37	HIV-positive	TBM	Alive	60	1295.64	662.468			830.255	848757	41691.6	1843.41	60.2824	85036.6	317920	690.086	0.888896	0.0187913	0.0138993	0.386979	0.0437399	0.000290464
Male	22	HIV-positive	TBM	Alive	60	409.547	795.115			2022.75	646538	171286	20655.4	91.8588	496690	147283	2827.94	1.17419	0.0187913	0.00857782	2.34724	0.132254	0.069542
Male	33	HIV-positive	TBM	Alive	60	975.686	360.37			4217.93	292641	104094	166690	118.412	122062	4.5253e+06	616.38	0.239159	0.0187913		1.33089	0.819374	0.00651919
Male	36	HIV-positive	TBM	Alive	60	1350.6	670.902			5284.36	345503	97421.4	45894.3		332433	2.65151e+06	428.487	0.907036	0.0187913	0.000655946	1.22996	0.251008	0.0419095
Male	38	HIV-positive	TBM	Alive	60	470.528	392.573		194.232	1054.84	173559	32392.7	18164.1	91.1412	244758	595573	762.265	0.308421	0.0722832		0.246322	0.120532	0.0271601
Female	27	HIV-positive	TBM	Alive	60		561.257			1193.94	488562	48108.8	37116.9	96.1647	355950	206134	2267.7	0.671218	0.0187913	0.00442061	0.484047	0.209709	0.0458657
Male	28	HIV-positive	TBM	Alive	60	1193.26	1025.14		844.05	1099.76	1.44497e+06	267876	78849.1	155.012	64955.1	1.48292e+06	883.708	1.66891	0.251245	0.0295888	3.80829	0.406067		335	749		1740270	92527		1826413	8896	1251800	1026	2544908	319241	270394
Male	35	HIV-positive	TBM	Dead	47	77.543	734.542		318.483	867.928	1.73424e+06	118989	84317.7	193.047	333335	1.35921e+06	580.1	1.04391	0.106502	0.0372012	1.55619	0.431797	0.0420611	227	258		1542802	9458		850530	17188	620115	646	3521406	238008	32941
Male	34	HIV-positive	TBM	Alive	60	155.086	841.119		361.328	1444.62	323245	69285.7	17626.2	89.7059	167532	150247	620.963	1.27313	0.118302	7.02238e-05	0.804372	0.118001	0.0141684	308	1200		117847	4821		1325758	3892	633556	418	1019244	118684	229226
Male	28	HIV-positive	TBM	Dead	2	160.356	671.669		261.356	1166.41	339035	55373.1	267690	92.5765	191925	1.07416e+06	240.595	0.908685	0.0907694	0.000485731	0.593928	1.2946	0.018272	1711	2842		581635	7888		12123889	33870	1190001	778	2267680	154197	1456262
Male	28	HIV-positive	TBM	Dead	39		1065.78		518.427	1667.76	663786	79211.4	544007	2319.44	52269.4	54633.8	3674.99	1.75631	0.161568	0.00903172	0.95451	2.59473		416	3606		1074	3577	69	2711433	46031	1102606	555	802970	80936	262213
Male	35	HIV-positive	TBM	Alive	60	301.138	1007.5		1005.43	850.541	828455	97452.5	71088.9	126.306	156398	290738	2948.24	1.63098	0.295691	0.0133651	1.23043	0.369553	0.0122954	455	2230		2974	4933		1309661	25219	774919	329	1452703	100832	156382
Male	44	HIV-positive	TBM	Alive	60	121.208	3149.02		301.344	2167.65	2.62993e+06	286690	468092	61.7176	151458	469142	578.954	6.23686	0.101782	0.0607716	4.09288	2.23753	0.0114644	1445	406		158613	6195		1367806	8918	861699	168	2096746	105264	333284
Female	29	HIV-positive	TBM	Alive	60		1331.84		444.162	1333.04	591063	63299.4	77359.6	95.4471	56322	387693	409.393	2.32854	0.141115	0.00711796	0.713822	0.399058			165		96673	6158		199431	4430	542155	116	1850039	81084	25140
Male	28	HIV-positive	TBM	Alive	60	66.2503	571.225		288.491	2858.8	296083	52934.6	126976	518.141	107690	1.32409e+06	356.691	0.692656	0.0982425		0.557042	0.632515	0.00410136	503			77723	5541	39	1387196	11514	859983	3211	1232635	1035860	271380
Female	38	HIV-positive	TBM	Follow-up < 60 days	21	544.306	1214.52		191.375	1133.09	1.59753e+06	182527	6889.65	313.612	108643	435360	6363.53	2.07623	0.0714966	0.0336037	2.51729	0.0674834	0.00426168	144	1192		52673	13964	40	2557206	7320	972432	2004	1159666	111080	207926
Female	54	HIV-positive	TBM	Alive	60	219.831	725.341			1724.26	1.6211e+06	179546	7939.58	714.059	92716.8	898669	771.812	1.02412	0.0187913	0.0342239	2.47219	0.0724236	0.00158248	176			603209	3620	48	2786423	5596	353533	2138	1175219	189516	97555
Male	40	HIV-positive	TBM	Alive	60	734.023	640.232		1189.67	1464.9	2.18378e+06	533560	13877.6	63.8706	164905	399998	1222.07	0.841073	0.346429	0.0490311	7.82707	0.100363	0.0137265	472	671		449834	7588	36	4236647	8862	555425	867	2543402	197451	466382
Male	45	HIV-positive	TBM	Alive	60	2207.34	1069.61		519.855	830.255	847305	276806	28157.3	63.8706	54818.8	122610	1407.29	1.76456	0.161961	0.0138611	3.94337	0.167552		182			681068	21520	44	2176972	7625	1344354	863	2099264	141077	140965
Male	44	HIV-positive	TBM	Alive	60	5808.19	984.501		926.884	1121.5	1.85167e+06	353674	243526	148.553	771717	506733	261.599	1.58151	0.274058	0.0402915	5.10608	1.1809	0.115809	1125	469		157656	7172		2556919	13149	928444	97	1196926	249893	206987
Male	29	HIV-positive	TBM	Alive	60		1093.38			1141.78	610231	392900	459323	216.729	216542	863921	3840.73	1.81568	0.0187913	0.00762239	5.69942	2.19627	0.0224134	891			1562301	32155		572191	6046	787558	745	2582213	171469	174972
Male	44	HIV-positive	TBM	Alive	60		817.35			1424.33	2.06469e+06	429240	37546	86.1176	544182	279251	4535.78	1.22201	0.0187913	0.0458971	6.24912	0.211727	0.0775314		462		314108	182680		1968469	10650	1215607	363	1325606	263761	150142
Male	32	HIV-positive	TBM	Alive	60	2119.26	841.119		389.891	1748.9	434205	290731	172948	45.2118	852046	336373	293.296	1.27313	0.126168	0.00299018	4.154	0.84882	0.129323
Male	32	HIV-positive	TBM	Alive	60	798.015	716.14		529.852	1191.05	1.41204e+06	689861	21631.1	111.953	58337.6	555130	12616.7	1.00433	0.164714	0.0287224	10.1913	0.136845
Male	43	HIV-positive	TBM	Alive	60	9203.52	1078.81			836.051	1.07405e+06	690298	68058.6		604799	137972	357.837	1.78435	0.0187913	0.0198281	10.1979	0.355296	0.0877289
Male	34	HIV-positive	TBM	Alive	60	407.289	476.915		806.918	2482.07	1.20038e+06	198280	98440.2	97.6	411899	1.01291e+06		0.489819	0.241019	0.0231525	2.75556	0.498247	0.0552777
Male	26	HIV-positive	TBM	Alive	60	2679.37	387.206		442.734	704.196	799203	255481	11196.4	75.3529	80480.4	544155	1396.21	0.296877	0.140721	0.0125953	3.6208	0.0877475
Male	35	HIV-positive	TBM	Alive	60	3935.87	529.821			2392.24	829877	165083	20826.1	417.671	374010	498336	3374.82	0.603606	0.0187913	0.0134025	2.25342	0.133057	0.0489039
Female	22	HIV-positive	TBM	Alive	60	3460.07	981.434		498.432	909.948	2.03106e+06	91308.2	2376.57	34.4471	183831	560371	2139.76	1.57491	0.156061	0.0450123	1.13749	0.0462485	0.0169105
Male	32	HIV-positive	TBM	Dead	6	888.356	1003.67		816.915	1025.87	952238	88760.2	2.09883e+06	45.9294	230127	260546	1712.04	1.62274	0.243772	0.0166225	1.09895	9.91048	0.0246986
Male	41	HIV-positive	TBM	Alive	60	4209.15	2158.39		602.689	941.825	271205	540646	189945	59.5647	230339	37168.3	1390.87	4.10625	0.184774		7.93426	0.928797	0.0247344
Male	36	HIV-positive	TBM	Dead	14		803.549			2480.62	157350	30371.7	272579	45.2118	29686.1	197015	472.787	1.19233	0.0187913		0.215751	1.3176
Female	29	HIV-positive	TBM	Dead	29	3463.84	759.078		724.084	1193.94	1.00957e+06	87721.3	47140	142.094	247458	209091	3627.25	1.09668	0.218206	0.0181312	1.08323	0.256869	0.0276142
Male	52	HIV-positive	TBM	Alive	60	673.796	1074.98			1431.57	765971	132066	8511.31	106.212	597196	300624	854.302	1.7761	0.0187913	0.0117208	1.754	0.0751137	0.0864499
Female	32	HIV-positive	TBM	Dead	37	1229.39	1503.59		2056.57	2296.6	836740	50547.4	722499	91.8588	37750.5	195241	4069.1	2.69793	0.585176	0.0135831	0.520933	3.43457
Male	45	HIV-positive	TBM	Dead	10	1224.12	1383.21		1952.31	1815.55	2.92544e+06	484007	185343	129.894	107591	476828	2507.53	2.43903	0.556464	0.0685481	7.07752	0.90714	0.00408471
Male	33	HIV-positive	TBM	Alive	60	366.635	2181.39		297.06	1191.05	3.82761e+06	566713	718134		116757	846140	994.076	4.15572	0.100602	0.0922893	8.32856	3.41403	0.00562667
Male	32	HIV-positive	TBM	Alive	60	804.038	627.964		315.626	1443.17	1.16644e+06	306494	8490.1	72.4824	926533	228940	333.777	0.814688	0.105716	0.0222593	4.39244	0.0750139	0.141854
Male	38	HIV-positive	TBM	Alive	60	945.572	617.996		815.487	660.727	1.01443e+06	42488.7	2580.97	180.847	62365.9	264887	1189.61	0.79325	0.243379	0.0182591	0.399036	0.0472103
Male	39	HIV-positive	TBM	Dead	8	949.337	1465.25		284.206	1301.17	944729	173231	111091	197.353	180074	1.61684e+06		2.61548	0.0970626	0.0164249	2.37667	0.557773	0.0162783
Male	44	HIV-positive	TBM	Alive	60		953.064			1304.07	1.54171e+06	147785	19004.9	50.9529	111705	598097	1277.44	1.5139	0.0187913	0.0321347	1.99177	0.124488	0.00477676
Female	33	HIV-positive	TBM	Alive	60	224.348	922.394		519.855	1237.41	480455	104072	17960.7	35.1647	69870.4	1.08109e+06	1349.62	1.44793	0.161961	0.00420728	1.33056	0.119575
Female	27	HIV-positive	TBM	Dead	25		697.738		208.513	762.154	301628	18782.9	18519.9	114.824	135194	936585	593.848	0.964754	0.0762164		0.0404559	0.122206	0.00872838
Male	41	HIV-positive	TBM	Alive	60		687.004			809.97	505193	111834	38034.8	93.2941	277562	381787	1311.43	0.941667	0.0187913	0.00485826	1.44796	0.214027	0.0326786
Female	33	HIV-positive	TBM	Alive	60	8959.6	1074.21		606.974	1020.07	231696	308730	24767.4	299.259	433561	41494.8		1.77445	0.185954		4.42626	0.151602	0.0589219
Male	63	HIV-positive	TBM	Alive	60	1617.86	577.359			1099.76	661423	54992.2	7470.05	63.1529	162278	1.2533e+06	548.021	0.705848	0.0187913	0.00896952	0.588165	0.0702144	0.0132845
Male	31	HIV-positive	TBM	Alive	60	3268.85	1186.15		307.057	641.89	2.91312e+06	1.47756e+06	166461	114.106	2.21752e+06	1.16581e+06	610.27	2.01522	0.103356	0.068224	22.1062	0.818299	0.359033
Male	30	HIV-positive	TBM	Alive	60		524.454			4697.53	91799.1	5068.92	79056.4	96.1647	143480	306059	641.585	0.592062	0.0187913			0.407042	0.0101223
Female	34	HIV-positive	TBM	Dead	6	210.796	650.2			1767.73	242267	23682.9	214938	176.541	64906.6	432838	894.019	0.862511	0.0187913		0.114575	1.04639
Male	30	HIV-positive	TBM	Alive	60	8539.51	992.935		277.066	1104.11	1.52533e+06	351419	40892.5		809531	1.22812e+07	3080.37	1.59965	0.0950959	0.0317037	5.07198	0.227473	0.12217
Male	28	HIV-positive	TBM	Alive	60	11330.3	1076.51		1128.26	1960.45	1.78657e+06	459148	28496.7	63.8706	285542	330391	329.194	1.7794	0.329516	0.0385783	6.70151	0.169149	0.0340211
Male	32	HIV-positive	TBM	Dead	19	44.4178	443.945			847.643	148150	19869	159018	151.424	19252.8	978448	676.338	0.418909	0.0187913		0.056886	0.783278
Male	35	HIV-positive	TBM	Alive	60	151.322	1103.35		1143.97	1848.88	418458	128628	581582	213.141	3.21999e+06	866131	2612.17	1.83712	0.333843	0.00257579	1.702	2.77152	0.527676
Male	30	HIV-positive	TBM	Alive	60	1071.3	432.444			1699.63	495029	48585.7	6684.29	130.612	183941	335273	3889.61	0.394173	0.0187913	0.00459079	0.491261	0.0665172	0.0169289
Male	27	HIV-positive	TBM	Alive	60	3801.11	537.488		159.955	840.398	590841	134383	5178.32	167.929	149578	2.26897e+07	1841.5	0.620096	0.0628435	0.00711213	1.78905	0.0594313	0.0111482
Male	54	HIV-positive	TBM	Alive	60	18185	1790.35			2538.58	2.0921e+06	462031	40885.7	37.3176	96379.2	4.34338e+06	5354.57	3.31469	0.0187913	0.0466184	6.74512	0.227442	0.00219861
Male	30	HIV-positive	TBM	Alive	60	687.347	2590.06		1263.93	1205.54	1.16651e+06	264915	475019	91.8588	921655	76709.9	821.84	5.03468	0.366882	0.0222611	3.7635	2.27012	0.141033	471	1305	117	1085076	7357		4768803	9766	987404	911	3186530	127001	1179201
Female	30	HIV-positive	TBM	Dead	31	1403.3	926.228		295.632	1415.64	3.09486e+06	284855	67970.9	50.9529	814361	271247	1127.36	1.45618	0.100209	0.0730066	4.06512	0.354883	0.122983	1005	2503		49867	4149		3298418	32115	566822	749	2706606	13481912	242764
Male	33	HIV-positive	TBM	Alive	60		1354.07			4104.91	1.37789e+06	227026	1.09114e+06	101.906	203872	908063	5121.23	2.37636	0.0187913	0.0278237	3.19039	5.16909	0.0202819	287			232043	11333	30	1641606	7190	927007	381	1778701	157551	197407
Male	28	HIV-positive	TBM	Alive	60	3138.61	1504.35		1395.32	475.26	601005	75112.5	6565.7	116.259	38379.3	2.5564e+06		2.69958	0.403068	0.00737961	0.892509	0.0659592		128	779		779603	5767		1505935	6469	1107583	357	2571091	1839527	153754
Male	25	HIV-positive	TBM	Dead	9		962.265		255.643	1453.31	851934	255781	69609.9	58.1294	42592.1	154821	1251.86	1.53369	0.0891961	0.0139829	3.62533	0.362595		662	648		1001025	8179		3206045	6312	874693	343	2546242	279229	337141
Male	37	HIV-positive	TBM	Follow-up < 60 days	3	113.679	2271.1		524.139	991.09	1.64888e+06	244297	359774		297037	211708	552.604	4.34866	0.163141	0.0349551	3.45163	1.72787	0.0359548	338	14052		168555	6298		4891422	19173	1074815	364	2589600	124406	417170
Male	32	HIV-positive	TBM	Alive	60	33.1251	1482.88		305.629	1309.86	724182	158812	102920	127.741	198915	656704	173.381	2.65341	0.102962	0.0106211	2.15856	0.519327	0.019448	156			137695	5371	33	2082857	8385	977390	183	2183948	151788	296252
Male	29	HIV-positive	TBM	Alive	60	76.7901	264.527		251.358	1304.07	1.20305e+06	218138	7273.37	121.282	68327.4	312046	6428.46	0.0330246	0.0880161	0.0232228	3.05594	0.0692889		540	860		397376	11293		1654579	7318	705141	493	1997478	134870	158176
Female	27	HIV-positive	TBM	Dead	22	653.469	1009.8		281.35	936.029	460718	73489.9	50980.1	101.906	480953	441989	3433.25	1.63593	0.0962759	0.00368788	0.867967	0.274938	0.0668946		2899		32135	4286		2487528	14198	1000135	773	2804064	96379	315562
Male	32	HIV-positive	TBM	Dead	6	623.355	1173.12			1638.78	868387	267710	17953	81.8118	197993	451587		1.98718	0.0187913	0.0144159	3.80578	0.119539	0.0192929	325			361277	5652	112	525855	5394	534013	325	1956431	104218	56632
Male	35	HIV-positive	TBM	Alive	60	2221.64	363.437		397.032	1008.48	2.46572e+06	142851	27182.6	441.353	126851	569884		0.245756	0.128135	0.0564505	1.91714	0.162966	0.00732486	588	1568		179535	9234	42	2159392	17377	829039	1940	1371009	139876	72692
Male	34	HIV-positive	TBM	Dead	9	334.263	1008.27			3651.38	600172	238307	89332.1	94.7294	101288	2.65574e+06	1165.55	1.63263	0.0187913	0.00735769	3.36102	0.455391	0.00302436	182			1777695	5993		362717	3980	1105013	1554	3507145	1479649	31353
Female	31	HIV-positive	TBM	Alive	60	268.765	1274.33		259.927	1212.78	1.07273e+06	174528	19311.4	104.059	59010.1	641511	1209.85	2.20486	0.0903761	0.0197934	2.39629	0.12593		437	191		270885	6074		414828	8725	641814	221	848581	160705	21535
Male	34	HIV-positive	TBM	Alive	60	1731.54	2672.87			1501.12	3.20131e+06	1.20429e+06	20811.6	70.3294	135070	137068	1462.66	5.21278	0.0187913	0.0758078	17.9726	0.132989	0.00870748
Male	35	HIV-positive	TBM	Alive	60	106.151	1324.17		1231.09	3165.98	4.07876e+06	611242	38470.6	118.412	95869.8	376374	907.385	2.31205	0.357836	0.0988984	9.00211	0.216078	0.0021129
Male	46	HIV-positive	TBM	Dead	55	6828.3	1141.68		538.421	1876.41	2.04474e+06	390277	42289.5	182.282	414662	144564	1130.41	1.91957	0.167074	0.0453723	5.65976	0.234047	0.0557427
Male	22	HIV-positive	TBM	Dead	9	4612.68	1090.31		575.554	625.952	1.07507e+06	447792	50993.6	116.259	38096	72566.2	1126.21	1.80908	0.1773	0.019855	6.52973	0.275001
Male	35	HIV-positive	TBM	Dead	31	11670.6	808.149			1588.06	1.40573e+06	852895	50514.4	98.3176	195307	228422	580.864	1.20222	0.0187913	0.0285564	12.6574	0.272747	0.018841
Male	25	HIV-positive	TBM	Alive	60	302.643	545.156		184.234	2697.97	138085	38961.3	325497	1034.13	1.00117e+06	1.20608e+06	351.344	0.636587	0.0695299		0.345679	1.56659	0.15441
Male	37	HIV-positive	TBM	Dead	2	12056.8	1662.3		1088.27	1669.2	3.62064e+06	541807	17711	109.8	503434	251037	214.244	3.03929	0.318503	0.0868429	7.95183	0.1184	0.0706766
Male	30	HIV-positive	TBM	Dead	3	10049.7	2358.51		2079.42	1395.35	6.11893e+06	723113	12454.6	123.435	347573	171142	4821.82	4.53666	0.59147	0.152586	10.6943	0.0936676	0.0444564
Male	38	HIV-positive	TBM	Alive	60	10652.7	1216.06		1029.71	4635.23	2.5767e+06	1.30967e+06	248648	442.788	72102.5	261384	1958.36	2.07953	0.302377	0.0593709	19.5667	1.205
Male	28	HIV-positive	TBM	Alive	60	143.04	1896.93			1959	1.45572e+06	1.23805e+06	270190	106.212	223555	4.43907e+06	2764.16	3.54391	0.0187913	0.0298718	18.4834	1.30636	0.0235931
Male	44	HIV-positive	TBM	Alive	60	19470.1	923.161			1699.63	2.34261e+06	1.06236e+06	53170.6	116.976	340449	487613	486.154	1.44958	0.0187913	0.0532108	15.8258	0.285244	0.043258
Male	31	HIV-positive	TBM	Alive	60	787.475	1242.89		854.047	2356.01	1.62931e+06	349607	72031.8	38.7529	383002	648807	2181.01	2.13725	0.253998	0.03444	5.04457	0.37399	0.0504164
Female	29	HIV-positive	TBM	Alive	60		1413.11		1081.13	1675	1.31199e+06	320466	39945.7	82.5294	87141.5	1.10094e+06	9395.79	2.50334	0.316537	0.0260895	4.60378	0.223019	0.000644568
Male	34	HIV-positive	TBM	Alive	60	8556.83	597.294		232.792	660.727	2.15459e+06	647812	328795	74.6353	120098	1.22349e+06	546.875	0.748724	0.0829029	0.0482629	9.55527	1.58211	0.00618876
Male	40	HIV-positive	TBM	Alive	60	7395.94	1399.31		347.046	914.295	1.37949e+06	604857	92339.2	65.3059	429510	72342.6	4961.98	2.47366	0.114369	0.0278659	8.90553	0.46954	0.0582405
Male	41	HIV-positive	TBM	Alive	60	928.257	2994.91		1388.18	770.848	5.59568e+06	1.09205e+06	19504.3	73.9176	350706	1.01876e+06	1731.52	5.90539	0.401101	0.138817	16.275	0.126838	0.0449834
Male	29	HIV-positive	TBM	Dead	13	28702.2	1474.45			928.785	827484	778037	115505	113.388	146156	821399	11027.6	2.63527	0.0187913	0.0133395	11.5251	0.578541	0.0105724
Male	41	HIV-positive	TBM	Alive	60	1201.54	1175.42		325.623	1008.48	1.37125e+06	156132	4501.51	125.588	101726	368478	1608.16	1.99213	0.108469	0.027649	2.11802	0.0562468	0.00309815
Male	44	HIV-positive	TBM	Dead	4	1817.37	1182.32		1055.42	1320	1.94449e+06	787565	79687	215.294	455944	99545.9	1753.28	2.00697	0.309457	0.0427341	11.6692	0.410009	0.0626875
Female	37	HIV-negative	TBM	Alive	60	2888.66	1006.74		538.421	805.623	600230	82405.1	39612.1	147.118	47939.2	504183	202.787	1.62933	0.167074	0.0073592	1.00282	0.221449		321			313698	5031		1981324	3763	1222902	674	1084437	136729	296036
Female	23	HIV-negative	TBM	Alive	60	770.16	864.122			1735.86	2.29846e+06	103895	7452.7	55.2588	30367.3	376541	640.822	1.3226	0.0187913	0.052049	1.32789	0.0701327		364			768402	5017		2659808	6840	1159028	242	3804128	149305	478998
Male	27	HIV-negative	TBM	Alive	60	7186.65	999.069			1163.52	1.58993e+06	394140	24504.2	101.906	53882.3	1.01821e+06	988.729	1.61284	0.0187913	0.0334035	5.71818	0.150364
Female	23	HIV-negative	TBM	Alive	60	770.913	1245.19			724.481	1.44619e+06	252117	12555.8	284.906	920182	311893	4250.12	2.1422	0.0187913	0.0296212	3.56991	0.0941439	0.140785	224	2121		278809	3977	493	3960229	10519	822538	1124	2286253	33842866	172737
Male	25	HIV-negative	TBM	Alive	60	204.774	907.826			1753.24	1.4595e+06	367548	14660.5	66.0235	367155	3.39053e+06	3451.58	1.4166	0.0187913	0.0299714	5.31595	0.104047	0.0477506	419	1778		321463	3898		1878187	7780	1370686	390	1877786	431332	346893
Female	47	HIV-negative	TBM	Alive	60	168.637	629.498			3073.25	147911	35348.7	37971.1	73.9176	28159.5	2.19624e+06	346.38	0.817986	0.0187913		0.291035	0.213728		159			830876	8884		2347014	3030	738531	389	1828594	1507586	124475
Female	42	HIV-negative	TBM	Alive	60	5686.23	761.378		454.159	949.07	2.57092e+06	531205	14399.2	108.365	1.03614e+06	1.20023e+06	3582.57	1.10163	0.143868	0.0592188	7.79146	0.102817	0.160292	2657	1024		118831	7913	324	4672913	17171	596235	228	2436311	276697	125030
Male	48	HIV-negative	TBM	Alive	60	548.823	1270.5		1251.08	1231.62	1.8222e+06	177816	95334.7	193.047	416828	4.65828e+06	3143	2.19661	0.363342	0.039516	2.44603	0.483635	0.0561069	1298	1536		647123	11475	85	1971649	14969	895905	1225	2722873	633087	105475
Male	25	HIV-negative	TBM	Alive	60	146.052	339.668			5335.08	1.35188e+06	327494	13421.6	132.047	50534.2	265728	1495.89	0.194634	0.0187913	0.0271392	4.71009	0.0982176		608	1241		428945	13844		2687000	7049	596166	946	2503170	264957	398005
Male	38	HIV-negative	TBM	Dead	52	660.997	980.667		546.99	688.257	583642	201468	75304	170.8	122524	2.17977e+06	516.705	1.57326	0.169434	0.00692269	2.80379	0.389387	0.0065969		2087		181387	27172		970021	3803	833048	780	310117	1230710	68493
Female	40	HIV-negative	TBM	Alive	60	667.02	670.902		185.662	1459.1	497335	37300.9	3336.84	268.4	47014.4	453194	620.581	0.907036	0.0699233	0.00465148	0.320564	0.0507668		508	561		521022	7222		1689227	5274	843369	1359	2040630	198054	243806
Male	44	HIV-negative	TBM	Alive	60	1893.4	817.35		639.821	1411.29	1.33693e+06	133448	4940.18	463.6	107475	1.1201e+06	1960.27	1.22201	0.195	0.0267459	1.77491	0.0583108	0.00406528	201	408		205977	8636		1575683	6417	1096663	963	1936875	1040208	346405
Female	26	HIV-negative	TBM	Alive	60	27024.1	1331.84		561.272	3116.72	2.76377e+06	1.90495e+06	330569	346.624	265717	397041	958.177	2.32854	0.173367	0.0642938	28.571	1.59046	0.0306859	1558	883		853674	5260	307	3881940	9834	917841	1717	3551449	3128915	425157
Female	25	HIV-negative	TBM	Alive	60	216.819	962.265		292.775	754.909	460828	63090	15952.4	83.9647	36802.4	1.31894e+06	1075.8	1.53369	0.0994225	0.00369078	0.710655	0.110126
Male	36	HIV-negative	TBM	Alive	60	527.744	587.327			825.908	897013	95249	3538.34	69.6118	2.65823e+06	359865	3015.45	0.727286	0.0187913	0.0151692	1.1971	0.0517149	0.433173
Male	26	HIV-negative	TBM	Alive	60	4066.86	1064.24		351.331	1249.01	1.52128e+06	146799	4501.51	114.106	97227.4	3.50137e+06	1870.91	1.75301	0.115549	0.031597	1.97685	0.0562468	0.00234129
Female	52	HIV-negative	TBM	Alive	60	229.617	241.525		232.792	867.928	162615	56806.5	104350	153.576	300271	768965	2657.23		0.0829029		0.61561	0.526055	0.0364988
Male	58	HIV-negative	TBM	Alive	60	2244.23	708.472		351.331	1218.58	1.00126e+06	159536	50517.3	119.129	50383.8	1.11686e+06	733.24	0.987841	0.115549	0.0179125	2.16952	0.27276
Male	52	HIV-negative	TBM	Dead	7	242.416	512.186		321.339	924.438	314747	20314.9	16595.5	155.729	105220	5.59751e+06	1113.23	0.565677	0.107289		0.0636296	0.113151	0.00368587
Male	22	HIV-negative	TBM	Alive	60	631.636	456.213		581.266	1414.19	744333	96394.7	18661.6	280.6	81119.9	620298	1568.83	0.445294	0.178874	0.0111513	1.21443	0.122873
Female	40	HIV-negative	TBM	Alive	60	807.049	1158.55			1108.46	5.78697e+06	251248	28037.8	102.624	965978	708459	1557.75	1.95585	0.0187913	0.143851	3.55677	0.166989	0.148489
Male	37	HIV-negative	TBM	Alive	60	871.041	583.493			1362.02	1.46713e+06	137120	41888.4	110.518	569911	1.31681e+06	323.848	0.719041	0.0187913	0.030172	1.83045	0.232159	0.0818598
Male	21	HIV-negative	TBM	Alive	60		557.424			749.113	69388.9	15606.7	494140	175.824	93684.3	512112	807.71	0.662972	0.0187913			2.36009	0.00174524
Female	19	HIV-negative	TBM	Alive	60	2127.54	498.384			1125.84	946896	100125	5845.5	611.435	658514	468358	2361.26	0.535993	0.0187913	0.0164819	1.27085	0.0625705	0.0967653
Male	49	HIV-negative	TBM	Alive	60	8775.15	729.941		329.908	2738.54	1.73864e+06	366312	6407.58	277.729	1.36896e+06	389081	1757.49	1.03401	0.109649	0.037317	5.29726	0.0652152	0.216282
Male	40	HIV-negative	TBM	Alive	60	140.782	384.906		277.066	1799.61	1.31253e+06	117851	24242		46208.9	513838	1665.45	0.29193	0.0950959	0.0261037	1.53898	0.14913
Male	41	HIV-negative	TBM	Alive	60	6233.55	935.429			901.254	530532	159790	23218.1		53035.1	5.0333e+06	72.9422	1.47597	0.0187913	0.00552507	2.17336	0.144312
Male	24	HIV-negative	TBM	Alive	60	2097.42	1153.18		699.805	2371.95	2.14838e+06	309473	16359.3		155519	593726	2468.58	1.94431	0.21152	0.0480994	4.4375	0.11204	0.0121476
Male	34	HIV-negative	TBM	Alive	60	2343.6	558.957			1819.9	1.09997e+06	1.06986e+06	135495	53.1059	219044	598420	1500.09	0.666271	0.0187913	0.0205101	15.9392	0.672599	0.0228342
Male	33	HIV-negative	TBM	Alive	60	347.061	1187.69			1175.11	1.44231e+06	343089	34410.6		33230.1	112178	3567.67	2.01851	0.0187913	0.0295189	4.94597	0.196975
Female	20	HIV-negative	TBM	Alive	60	466.011	878.69			1948.85	290271	47060.5	49296.7	55.2588	42212.6	538282	1289.28	1.35394	0.0187913		0.468189	0.267017
Female	21	HIV-negative	TBM	Alive	60	302.643	464.647		227.079	1556.19	920515	85297.6	3873.86	168.647	415053	1.19748e+06	756.154	0.463434	0.0813296	0.0157877	1.04657	0.0532936	0.0558083
Male	38	HIV-negative	TBM	Alive	60	1535.05	565.858		281.35	1740.2	1.32752e+06	308784	3267.42	41.6235	157352	899623	349.435	0.681112	0.0962759	0.0264983	4.42708	0.0504402	0.0124559
Male	28	HIV-negative	TBM	Alive	60	5561.26	888.657			2360.36	952777	348462	3027.36	487.282	221878	642738	434.216	1.37537	0.0187913	0.0166366	5.02724	0.0493106	0.0233109
Female	22	HIV-negative	TBM	Alive	60	465.258	1051.97		398.46	918.642	1.7531e+06	496478	4361.71	116.976	84397.1	125276	3434.39	1.72663	0.128528	0.0376976	7.26616	0.055589	0.000182878
Male	40	HIV-negative	TBM	Alive	60	1343.83	697.738		408.457	1160.62	3.74773e+06	90420.6	36946.3	106.212	966597	872491	119.915	0.964754	0.131282	0.0901872	1.12406	0.208906	0.148593
Male	43	HIV-negative	TBM	Alive	60	8684.81	731.475		1311.06	3292.04	393829	203414	72407.8	55.2588	463545	1.85205e+06	473.933	1.03731	0.379862	0.00192767	2.83322	0.375759	0.0639661
Male	21	HIV-negative	TBM	Alive	60	34774.6	1095.68		1576.7	1157.72	2.16925e+06	368341	7435.34	207.4	134175	609396	1358.02	1.82063	0.45302	0.0486488	5.32795	0.070051	0.00855696
Male	47	HIV-negative	TBM	Alive	60	15021.5	718.44			678.114	1.12827e+06	397621	17220.3		48232.3	160445	128.317	1.00928	0.0187913	0.0212547	5.77085	0.116091
Male	53	HIV-negative	TBM	Alive	60	11126.3	2146.89		1065.42	1493.88	6.49794e+06	848373	42841.9	236.106	2.48752e+06	281485	2252.81	4.08151	0.31221	0.16256	12.589	0.236646	0.404454
Female	46	HIV-negative	TBM	Alive	60	1416.85	765.212			459.321	2.21412e+06	124478	11202.2	89.7059	75942.5	3.62346e+06	986.438	1.10987	0.0187913	0.0498294	1.63922	0.0877748
Female	46	HIV-negative	TBM	Alive	60	2297.68	686.237		1018.29	988.192	1.33098e+06	72586.1	3769.73	58.1294	33710.5	951410	2113.41	0.940017	0.299231	0.0265892	0.854295	0.0528036
Male	44	HIV-negative	TBM	Alive	60	9225.35	1000.6		337.049	831.704	1.53704e+06	300000	117348	73.9176	219544	693781	1351.15	1.61614	0.111616	0.0320118	4.2942	0.58721	0.0229183
Female	47	HIV-negative	TBM	Alive	60	478.056	1153.18		135.676	1225.82	3.20849e+06	161377	49358.4	125.588	997937	688109	813.057	1.94431	0.056157	0.0759967	2.19737	0.267307	0.153866
Male	42	HIV-negative	TBM	Alive	60		724.574		1083.98	825.908	373523	61666.1	430559	218.165	824866	324534	453.311	1.02247	0.317323	0.00139332	0.689116	2.06093	0.12475
Female	18	HIV-negative	TBM	Alive	60	12431.7	571.225		379.894	1425.78	1.26331e+06	200813	23729.1	76.0706	51705.6	238333	426.196	0.692656	0.123415	0.0248085	2.79388	0.146716
Male	26	HIV-negative	TBM	Alive	60	15282	837.286		594.12	473.811	1.22239e+06	287371	111143	38.0353	135793	1.76833e+06	4538.45	1.26489	0.182414	0.0237317	4.10317	0.558014	0.00882911	162			123362	7821		2125623	5675	1295329	213	784175	608148	226113
Male	45	HIV-negative	TBM	Alive	60		392.573			917.193	490159	68625	5390.43	151.424	55571.8	661595	3886.94	0.308421	0.0187913	0.00446263	0.794379	0.0604293		362			23792	8583		2019366	14971	425535	361	936503	140792	42575
Female	34	HIV-negative	TBM	Alive	60	2492.67	675.502			3757.16	3.44407e+06	308118	14108.1	65.3059	416100	4.89755e+06	1313.34	0.91693	0.0187913	0.0821962	4.417	0.101447	0.0559845	212			510192	4037		4837015	14082	1084394	194	3561556	1289513	190058
Male	31	HIV-negative	TBM	Alive	60		778.246		319.911	3802.08	163892	5397.22	129003	67.4588	18100.8	398969	651.515	1.13791	0.106896			0.642051		179			938437	6178	20	1246645	5080	1218353	380	1641768	330596	233135
Female	20	HIV-negative	TBM	Alive	60	133.253	1011.34			2676.23	1.40586e+06	283288	17246.3	51.6706	24430.1	203038	1594.8	1.63923	0.0187913	0.0285598	4.04142	0.116213		196			454013	8368	66	1552060	2124	606668	305	1016915	181075	97986
Male	26	HIV-negative	TBM	Alive	60	435.144	918.561			937.478	783845	174598	29593.9	50.9529	40912.2	641935	1733.04	1.43969	0.0187913	0.0121911	2.39735	0.174311		75	522		199622	6515		1633494	4377	675154	305	479081	559221	404464
Female	23	HIV-negative	TBM	Alive	60	5678.7	1387.81		1443.88	654.931	1.79035e+06	453312	11002.6	155.729	1.6089e+06	178037	742.788	2.44892	0.416441	0.0386779	6.61323	0.0868357	0.256647	242			893788	4336		1994924	9378	1158059	340	1489355	160591	213194
Female	21	HIV-negative	TBM	Alive	60	828.129	1214.52		529.852	2227.05	3.48902e+06	789119	28771.5	27.9882	412061	309864	803.127	2.07623	0.164714	0.0833792	11.6927	0.170442	0.055305	202			146532	25565		919160	14009	834165	133	742084	15406289	188020
Male	34	HIV-negative	TBM	Alive	60	39118.5	730.708		574.126	1356.23	3.49516e+06	958853	27583.7	143.529	192070	622504	2437.26	1.03566	0.176907	0.0835408	14.2602	0.164853	0.0182965	619	917		746897	7868		2327141	10160	1358258	358	2507477	331025	436810
Female	50	HIV-negative	TBM	Alive	60	36.8894	956.898		562.7	741.869	2.78682e+06	596425	21830.7		72265.5	941207	2813.05	1.52214	0.173761	0.0649004	8.77799	0.137784					686970	20719		2107171	4550	1128815	444	360249	471270	287634
Male	21	HIV-negative	TBM	Alive	60	5304.54	917.794			2400.93	5.3208e+06	720102	11486.6	149.271	322947	454312	533.891	1.43804	0.0187913	0.131583	10.6488	0.089113	0.0403136	336			163848	5021		4631884	15466	802641	546	2156458	161570	185907
Female	28	HIV-negative	TBM	Alive	60	1021.61	611.096			2232.85	624549	61852.5	3801.55	36.6	107108	3.71008e+06	690.468	0.778408	0.0187913	0.00799916	0.691936	0.0529533	0.00400341				409696	7272		713441	2683	760361	977	1338234	623493	42949
Male	29	HIV-negative	TBM	Alive	60	264.248	601.895			4403.4	2.64966e+06	115658	8841.04	76.0706	86104.1	557940	1791.09	0.758619	0.0187913	0.0612909	1.50582	0.0766651	0.000470046
Male	35	HIV-negative	TBM	Alive	60	103.14	356.536			1277.98	545869	224509	26548.2		88868.9	148342	557.568	0.230914	0.0187913	0.00592867	3.15232	0.159981	0.000935164	471			188652	31121		1431575	9065	1133743	228	753864	72896	101001
Male	47	HIV-negative	TBM	Alive	60	3156.68	633.331		541.278	875.173	1.16375e+06	270621	208052	98.3176	231097	990262	1126.98	0.826231	0.167861	0.0221886	3.84982	1.01399	0.0248619	422	2760		182682	4623	28	3086860	8068	1318687	729	1083188	170719	388664
Female	41	HIV-negative	TBM	Alive	60	605.287	791.281			1201.19	2.05961e+06	144964	38000.1	96.1647	112112	351802	2682.44	1.16594	0.0187913	0.0457634	1.9491	0.213864	0.00484532
Male	41	HIV-negative	TBM	Alive	60	971.169	262.994		314.198	1189.6	250432	75743.4	29348	118.412	685554	411632	1707.84	0.0297264	0.105322		0.902053	0.173154	0.101314	330	2949		2027389	9557		2420167	8697	1187644	793	3093327	209610	404518
Female	44	HIV-negative	Bacterial meningitis	Follow-up < 60 days	16	835.657	514.486		249.93	1260.6	340320	145274	339845	321.506	919254	1.7745e+06	546.875	0.570624	0.0876228	0.000519551	1.95378	1.6341	0.140629
Female	48	HIV-negative	TBM	Alive	60	2339.09	1380.91		1475.3	2719.7	1.48031e+06	186055	53525.4	221.035	138380	406397	1328.23	2.43408	0.425094	0.0305189	2.57064	0.286914	0.00926435				679278	13212		814316	3535	1183590	504	947031	130464	102576
Female	47	HIV-negative	TBM	Alive	60	630.131	449.313		214.226	1098.31	541223	86033.9	13490.1	68.1765	38944.1	274278	377.313	0.430452	0.0777897	0.0058064	1.05771	0.0985397		789	607		333825	4760	109	1721870	5317	561887	628	1259367	170987	83061
Male	30	HIV-negative	TBM	Alive	60	70.0145	449.313		187.091	5385.79	395012	180420	37177.7		148535	231023	1789.57	0.430452	0.0703166	0.0019588	2.48541	0.209995	0.0109727	447	1261		351226	5221		2546831	7832	1276591	256	2118894	6488379	433042
Male	63	HIV-negative	TBM	Alive	60	104.645	593.461		825.484	1553.29	1.62078e+06	351349	71653.9	161.471	156438	207832	2689.69	0.740479	0.246132	0.0342155	5.07091	0.372212	0.0123022	756	902		1353718	5720		2415484	7090	1123979	1287	4066001	165975	196491
Male	56	HIV-negative	TBM	Alive	60		821.184			1521.41	956605	185459	22860.4	66.0235	181585	195524	2342.17	1.23026	0.0187913	0.0167374	2.56163	0.142629	0.0165325
Male	79	HIV-negative	TBM	Dead	12		554.357			1757.59	605464	35554.1	21017	137.071	226820	261032	8753.06	0.656376	0.0187913	0.00749695	0.294141	0.133955	0.0241424	2182	1890		819902	9055	237	1133676	28820	315760	1655	2802334	50037	80122
Male	35	HIV-negative	TBM	Alive	60	103.893	680.87		1912.32	2067.67	426150	20814.7	6415.3	506.659	55259.3	7.31317e+06	541.147	0.928474	0.545451	0.0027782	0.0711907	0.0652515		179	754		1218585	9445		2031849	4748	869327	2356	2326662	2404198	217514
Female	43	HIV-negative	TBM	Alive	60	2283.38	935.429			6039.27	1.08501e+06	94699.2	4451.37	78.2235	38676.3	293434	1889.24	1.47597	0.0187913	0.0201164	1.18878	0.0560109		577			67419	14079		1630934	10888	439586	81	891456	118010	179912
Female	24	HIV-negative	TBM	Alive	60	151.322	616.463		201.372	1085.27	319068	59087	44751.8	226.059	120741	375114	1017.37	0.789951	0.0742498		0.650105	0.245633	0.006297	657	666		97992	5180		992255	7194	655875	137	1623989	111615	53896
Male	36	HIV-negative	TBM	Dead	7	4574.28	1112.55			1717.02	5.79803e+06	594930	5430.92	379.635	2.3149e+06	516764	3911.38	1.8569	0.0187913	0.144142	8.75537	0.0606199	0.375415
Male	53	HIV-negative	TBM	Alive	60	5744.95	332.001			2810.99	819326	113336	34241.9	56.6941	116627	439972	4245.92	0.178143	0.0187913	0.0131248	1.47069	0.196181	0.00560479	115			237660	3909		1207213	4794	661001	238	582862	162869	291416
Female	80	HIV-negative	TBM	Alive	60	346.308	513.719		586.979	1337.39	460609	152572	152526	142.812	833263	258114	284.894	0.568975	0.180447	0.00368502	2.06417	0.75273	0.126163	196			39448	29663		2090523	5688	760344	282	520856	107406	422244
Female	63	HIV-negative	TBM	Alive	60	2686.15	1058.87			1728.61	1.01427e+06	222866	63572.6	374.612	41214	1.49998e+06	2287.56	1.74147	0.0187913	0.0182548	3.12747	0.334188		1048	9166		23175	5621		178625	7440	485917	1453	1243151	11917	9806
Male	51	HIV-negative	TBM	Alive	60	1769.94	566.625			3499.24	2.56582e+06	248276	9176.55	91.1412	96131.8	660883	733.622	0.682761	0.0187913	0.0590847	3.51182	0.0782438	0.00215698
Male	50	HIV-negative	TBM	Alive	60	1897.92	705.405			1154.82	2.93838e+06	271831	28980.7	234.671	872958	304044	1167.46	0.981244	0.0187913	0.0688887	3.86811	0.171426	0.132841
Female	43	HIV-negative	TBM	Alive	60	15329.4	1074.98		235.649	1325.8	1.37592e+06	671138	42632.7	307.871	86512.7	148124	12324.9	1.7761	0.0836896	0.0277718	9.90811	0.235662	0.000538777
Female	24	HIV-negative	TBM	Alive	60	1881.36	643.299			1091.07	487866	34813.7	2948.3	118.412	127538	837256	995.603	0.847669	0.0187913	0.0044023	0.282942	0.0489386	0.00744045
Female	46	HIV-negative	TBM	Alive	60	2355.65	1199.96		1876.62	495.545	1.27104e+06	155919	48445.4	175.106	24088.5	395013	2224.93	2.0449	0.535618	0.0250118	2.11481	0.263011
Male	22	HIV-negative	TBM	Alive	60	5304.54	493.017		367.04	1404.04	1.06382e+06	277232	4836.06	488	165029	622365	2156.57	0.52445	0.119875	0.0195589	3.94981	0.0578209	0.0137474
Male	65	HIV-negative	TBM	Alive	60	367.388	611.863			2325.58	82393.7	36175.5	468978	94.7294	65888.7	1.47757e+06	940.228	0.780057	0.0187913		0.303541	2.2417
Male	20	HIV-negative	TBM	Alive	60	901.155	375.705		351.331	709.991	381030	70493.4	8696.42		54668.3	612126	2858.87	0.272141	0.115549	0.00159085	0.822641	0.0759847
Male	34	HIV-negative	TBM	Alive	60	7325.17	1781.92		615.543	2595.09	1.70753e+06	573313	21398.8		82197.1	275719	2587.73	3.29655	0.188313	0.0364983	8.42839	0.135752
Female	64	HIV-negative	TBM	Dead	5	96.3641	956.898		438.449	2289.36	727800	20350	323122	166.494	124734	579416	1097.57	1.52214	0.139541	0.0107163	0.064161	1.55542	0.00696864
Female	25	HIV-negative	TBM	Alive	60	1429.65	522.153			1918.43	2.10966e+06	175921	2570.36	83.2471	175784	206465	645.786	0.587115	0.0187913	0.0470807	2.41736	0.0471604	0.0155568
Male	27	HIV-negative	TBM	Alive	60	7813.02	1412.34		554.131	708.542	1.73984e+06	254414	8954.8	74.6353	73621.2	167216	1595.56	2.50169	0.171401	0.0373487	3.60465	0.0772004
Female	39	HIV-negative	TBM	Alive	60	3562.46	856.454		324.195	2393.69	2.57622e+06	288681	5197.6	157.165	100674	463727	2950.15	1.30611	0.108076	0.0593582	4.123	0.059522	0.00292118
Male	43	HIV-negative	TBM	Alive	60	1192.51	608.029			5995.8	2.48512e+06	333074	7681.19		897072	1.49954e+06	1032.27	0.771812	0.0187913	0.0569611	4.79448	0.0712078	0.136897
Male	55	HIV-negative	TBM	Alive	60	7538.98	1952.13		339.905	1663.41	1.69153e+06	384592	172918	154.294	152379	782290	2105.01	3.66265	0.112402	0.0360772	5.57377	0.848679	0.0116193
Female	42	HIV-negative	TBM	Alive	60	1268.54	743.743			4932.27	1.81678e+06	112573	5603.5	45.2118	53827.9	1.32398e+06	2412.44	1.0637	0.0187913	0.0393733	1.45914	0.0614319
Female	61	HIV-negative	TBM	Alive	60	11177.5	1010.57		2062.28	2422.66	1.9072e+06	366888	64334.2		773398	1.40301e+06	671.373	1.63758	0.58675	0.0417529	5.30596	0.337771	0.116092
Female	45	HIV-negative	TBM	Alive	60	5272.17	536.722		814.059	1008.48	1.18566e+06	243704	41645.4	350.212	41952.5	1.25379e+06	3115.89	0.618447	0.242985	0.0227652	3.44266	0.231016
Female	29	HIV-negative	TBM	Alive	60	5108.8	909.36			3996.24	2.90215e+06	190452	2826.82	176.541	130009	487484	2557.18	1.4199	0.0187913	0.0679354	2.63716	0.048367	0.0078561
Male	46	HIV-negative	TBM	Dead	10	1784.24	910.893		776.926	3694.85	2.00599e+06	182468	435309		249618	1.80674e+06	3015.45	1.4232	0.232759	0.0443525	2.51639	2.08328	0.0279776
Female	21	HIV-negative	TBM	Alive	60	11633.7	782.847		668.385	1146.13	1.24274e+06	215890	4487.04	88.9882	39751.6	229721	1755.58	1.1478	0.202866	0.0242673	3.02194	0.0561787
Male	64	HIV-negative	TBM	Alive	60		1171.59		444.162	518.728	1.25641e+06	129494	11417.2	91.8588	169321	331308	2314.29	1.98388	0.141115	0.0246268	1.7151	0.0887864	0.0144695
Male	27	HIV-negative	TBM	Alive	60	5172.79	887.124			1082.37	3.87357e+06	336925	11503	210.988	169157	2.64435e+06	1154.85	1.37208	0.0187913	0.0934988	4.85274	0.0891901	0.0144419
Male	36	HIV-negative	TBM	Alive	60	491.607	584.26			714.338	2.21608e+06	297947	134823	592.776	346369	880907	658.771	0.72069	0.0187913	0.049881	4.26314	0.669437	0.0442538
Male	49	HIV-negative	TBM	Alive	60	1047.96	721.507		437.021	1320	568664	104645	82658.4		53922.1	616919	327.285	1.01588	0.139148	0.00652853	1.33923	0.42399
Female	30	HIV-negative	TBM	Alive	60	10354.6	1344.1		539.849	1024.42	3.45804e+06	283095	2605.07	45.9294	78413.3	356747	2961.22	2.35493	0.167467	0.0825639	4.0385	0.0473237
Male	33	HIV-negative	TBM	Alive	60	15215	2154.55		1689.53	2471.93	2.54092e+06	517492	40459.6		789917	96346.1	1568.45	4.098	0.484092	0.0584294	7.58404	0.225436	0.118871
Male	25	HIV-negative	TBM	Alive	60	22763	912.427		462.728	1250.45	807468	371905	20554.2		1.39959e+06	945945	457.893	1.4265	0.146228	0.0128128	5.38186	0.131778	0.221435
Male	37	HIV-negative	TBM	Alive	60	1926.53	1188.45		168.524	1306.96	8.93607e+06	392643	4021.37	51.6706	169214	328488	4368.51	2.02016	0.0652034	0.226721	5.69554	0.0539876	0.0144515
Female	30	HIV-negative	TBM	Alive	60	271.777	636.398		312.77	1753.24	3.92816e+06	91077.2	28174.7	104.776	1.74933e+06	632279	1768.18	0.832827	0.104929	0.0949354	1.13399	0.167634	0.28027
Male	60	HIV-negative	TBM	Alive	60	1236.92	735.308			1047.6	354989	123144	87141.6		139679	723389	1276.68	1.04556	0.0187913	0.000905565	1.61905	0.445085	0.00948279
Male	56	HIV-negative	TBM	Alive	60	430.627	637.165			736.073	1.01999e+06	186561	3843.01	275.576	73236.9	319171	630.51	0.834476	0.0187913	0.0184053	2.57831	0.0531484
Male	50	HIV-negative	TBM	Alive	60	682.077	690.837		746.934	1221.47	354773	68285.9	985401	139.224	82605.6	551900	495.319	0.949912	0.224499	0.000899887	0.789249	4.67157
Male	54	HIV-negative	TBM	Alive	60	557.105	421.71			1525.76	1.22076e+06	144655	4899.69	52.3882	526250	200713	1392.01	0.371086	0.0187913	0.0236888	1.94442	0.0581203	0.0745147
Male	32	HIV-negative	TBM	Alive	60	738.54	425.543		134.248	1843.08	3.39137e+06	251533	19574.7	223.906	1.41553e+06	159593	283.367	0.379331	0.0557636	0.0808093	3.56108	0.127169	0.224116
Male	68	HIV-negative	TBM	Alive	60	314.689	532.121		515.57	978.049	168405	20949.8	3.52552e+06	82.5294	35767.9	1.87528e+06	4613.3	0.608553	0.160781		0.0732343	16.6233
Male	50	HIV-negative	TBM	Alive	60	666.267	693.904		734.081	1231.62	353583	261141	1.73163e+06	22.2471	62480.5	237132	627.073	0.956508	0.220959	0.000868572	3.70642	8.1827
Male	35	HIV-negative	TBM	Alive	60	19171.2	587.327			1214.23	874931	175476	2446.95	94.0118	45682	1.86224e+07	2509.44	0.727286	0.0187913	0.0145881	2.41063	0.0465797
Male	18	HIV-negative	TBM	Alive	60	384.703	483.816			1120.05	252631	59849	3272.24	154.294	47407.4	626823	898.983	0.504661	0.0187913		0.66163	0.0504629
Male	50	HIV-negative	TBM	Dead	3	36.1365	1567.99		1495.3	589.728	3.0809e+06	621107	70229.8	137.788	181098	467903	1070.07	2.83646	0.4306	0.0726393	9.15133	0.365512	0.0164506	735	820	85	545915	9003		6955150	14332	1262184	290	729337	20370388	818137
Female	18	HIV-negative	TBM	Alive	60	6649.12	539.788		911.174	886.765	1.21526e+06	319504	8198.93	383.224	48002.3	6.54434e+06	1660.1	0.625044	0.269731	0.0235439	4.58923	0.0736439		295			218511	7929		2518602	5596	1171036	1393	1302431	616270	291861
Female	46	HIV-negative	TBM	Dead	47	8642.65	912.427		1018.29	1054.84	917831	181042	447025		82082.6	1.36358e+06	4175.65	1.4265	0.299231	0.015717	2.49483	2.13841
Male	19	HIV-negative	TBM	Dead	25	255.967	1125.58		805.49	1275.09	1.36101e+06	401995	70969.3	40.9059	121031	1.77974e+07	2543.43	1.88494	0.240625	0.0273796	5.83699	0.368991	0.00634565	320	776		721992	6690		1728878	5610	812367	228	1790141	7517567	245888
Male	43	HIV-negative	TBM	Alive	60	3263.58	1124.81		774.07	2405.28	1.07789e+06	189796	69956	75.3529	348458	1.31266e+07	372.731	1.88329	0.231972	0.0199291	2.62723	0.364223	0.0446053	548			666114	13393	31	2714572	6100	1324694	392	1659009	1712542	197242
Male	27	HIV-negative	TBM	Alive	60	1711.21	956.131		914.031	857.785	1.03422e+06	278933	16497.2	110.518	84688.2	183185	1345.8	1.52049	0.270518	0.0187799	3.97554	0.112689	0.000231855	199			705000	8025		1544675	5521	1093311	214	1630746	113376	309315
Male	23	HIV-negative	TBM	Alive	60	11876.1	737.609		472.725	1182.35	1.46282e+06	507549	12239.6	292.8	257704	628416	3138.04	1.05051	0.148981	0.0300588	7.43363	0.0926559	0.0293379	210		104	348962	6418	32	2174133	5086	896353	266	1109118	139282	311473
Female	30	HIV-negative	TBM	Alive	60	126.478	1832.52		628.396	1056.29	2.20614e+06	286463	36033.3		50650.7	197660	2356.68	3.40539	0.191853	0.0496194	4.08944	0.20461		416			303115	4371		1045521	4507	872849	259	1160748	89171	150385
Female	22	HIV-negative	TBM	Alive	60	2951.9	854.921		775.498	1630.08	1.29886e+06	157797	9152.45	40.9059	68643.8	488200	698.488	1.30281	0.232366	0.0257441	2.14322	0.0781304
Male	25	HIV-negative	TBM	Alive	60	1399.54	1081.11		281.35	1419.98	7.00053e+06	182549	141496		138580	554299	1058.62	1.78929	0.0962759	0.175786	2.51761	0.700833	0.00929798
Female	18	HIV-negative	TBM	Alive	60	1220.36	1117.91		598.404	1428.68	1.03477e+06	387270	15819.4	122	30009.2	170310	1883.51	1.86845	0.183594	0.0187944	5.61427	0.1095
Female	26	HIV-negative	TBM	Dead	44	4249.05	1032.81		912.603	1240.31	780059	167808	16190.6	43.7765	135415	357030	431.161	1.6854	0.270125	0.0120915	2.29464	0.111246	0.00876544
Male	43	HIV-negative	TBM	Dead	44	5707.31	1739.74		1041.14	786.786	3.35499e+06	389126	40573.3		893863	520266	2156.95	3.20585	0.305524	0.0798521	5.64235	0.225972	0.136357
Male	70	HIV-negative	TBM	Alive	60	112.927	533.655			4867.06	403485	40225.8	56466.9	84.6824	18144.5	137065	1742.59	0.611851	0.0187913	0.00218178	0.364806	0.300754
Male	20	HIV-negative	TBM	Alive	60	15298.5	815.05		1131.11	907.05	1.26477e+06	688419	536666	535.365	267575	172574	4705.72	1.21706	0.330303	0.0248469	10.1695	2.56019	0.0309985
Male	44	HIV-negative	TBM	Alive	60	2831.45	1101.81		869.757	921.54	983805	297239	37164.2	88.2706	280935	148870	7344.24	1.83382	0.258325	0.0174532	4.25243	0.209931	0.0332461
Female	30	HIV-negative	TBM	Alive	60	328.993	1607.86	622.377	761.216	1315.66	3.03657e+06	586454	168900	47.3647	65450	235269	3555.45	2.92221	0.228432	0.0714727	8.62716	0.829776
Female	29	HIV-negative	TBM	Dead	6	2141.84	493.784			2303.85	1.52317e+06	240328	46566.3	36.6	648205	497357	789.761	0.526099	0.0187913	0.0316469	3.39159	0.25417	0.095031
Male	33	HIV-negative	TBM	Alive	60	5045.56	1078.04		267.068	456.423	1.72741e+06	128342	1298.68	55.2588	65844	249177	3056.7	1.7827	0.0923427	0.0370216	1.69766	0.0411768
Male	58	HIV-negative	TBM	Alive	60	395.996	733.008			2579.15	1.61342e+06	114811	167596	50.2353	703253	248544	535.418	1.04061	0.0187913	0.0340218	1.493	0.823638	0.104292
Female	30	HIV-negative	TBM	Alive	60	832.646	731.475			1386.66	2.68009e+06	196679	30632.2	41.6235	253021	151570	194.385	1.03731	0.0187913	0.0620917	2.73135	0.179197	0.0285502
Female	30	HIV-negative	TBM	Alive	60	4069.88	1095.68			1559.08	6.29508e+06	527307	3911.46		756732	1.03741e+06	1625.73	1.82063	0.0187913	0.157222	7.7325	0.0534705	0.113288
Female	30	HIV-negative	TBM	Alive	60	6179.35	788.214		484.151	1031.66	3.29834e+06	349168	13830.4	60.2824	127298	184085	351.726	1.15934	0.152128	0.0783614	5.03793	0.100141	0.00739996
Male	25	HIV-negative	TBM	Alive	60	18060	1424.61		561.272	2216.91	2.69065e+06	244489	3874.82	255.482	376454	1.27471e+06	607.597	2.52808	0.173367	0.0623696	3.45453	0.0532981	0.0493149
Male	30	HIV-negative	TBM	Alive	60	85.0714	318.966		488.435	1101.21	382027	49898.9	57382.9	68.1765	115605	946381	986.438	0.150109	0.153308	0.00161709	0.511124	0.305064	0.00543288
Male	23	HIV-negative	TBM	Alive	60	7885.29	858.754		976.87	1156.27	1.88367e+06	464808	89784.3	30.1412	137508	794332	847.809	1.31106	0.287824	0.0411335	6.78712	0.457519	0.00911758
Male	26	HIV-negative	TBM	Alive	60	20959.2	539.022		635.537	944.723	1.29415e+06	287648	7738.08	296.388	42349.5	1.02543e+06	1798.73	0.623394	0.19382	0.0256202	4.10736	0.0714755
Male	29	HIV-negative	TBM	Alive	60	3762.72	680.87		459.872	1788.02	1.5501e+06	172556	26574.2	115.541	127765	476191	2655.71	0.928474	0.145441	0.0323556	2.36645	0.160103	0.00747849
Male	86	HIV-negative	TBM	Alive	60	1835.43	1475.98			818.663	3.45399e+06	385557	23160.2	182.282	246007	169394	6077.88	2.63857	0.0187913	0.0824573	5.58836	0.14404	0.0273702
Female	70	HIV-negative	TBM	Dead	46	575.173	1279.7		595.548	1631.53	1.02188e+06	153947	179430	135.635	146584	619708	8251.25	2.2164	0.182807	0.0184551	2.08498	0.879318	0.0106445
Female	33	HIV-negative	TBM	Alive	60	1790.26	788.981			1131.64	1.57494e+06	511638	78947.5	50.9529	42862.8	662434	476.224	1.16099	0.0187913	0.0330093	7.49549	0.40653
Female	34	HIV-negative	Non-infectious control	Alive	60		568.604			1544.04	116566	4849.66	65270.8		133364	297895		0.217939	0.00854226	0.00915366		0.337293	0.0149014	108.504	3949.11		757040	3771.58	323.718	527710	7818.04	510546	715.637	4.44838e+07	84319.4	66112.5	14.8622	0.00195868	3.70943	0.026392	16.7332	8.19619
Male	21	HIV-negative	TBM	Alive	60	48079.9	1674.14	4615.78	2381.16	1757.96	516656	447149	25621.9	267.675	216464	36263		1.76764	0.647989	0.0435543	10.233	0.116122	0.02796
Female	30	HIV-negative	TBM	Alive	60	357.842	864.973	2060.85	836.805	2240.65	202991	8859.32	37781.1		677089	939647	618.506	0.633378	0.233261	0.0165847		0.183949	0.100344
Female	44	HIV-negative	TBM	Alive	60	7969.1	1549.71		1243.51	1098.38	3.04973e+06	332750	5824.16	289.418	117862	430774	2003.52	1.59322	0.342479	0.261354	7.49038	0.00568532	0.0124654
Male	46	HIV-negative	TBM	Dead	5	4194.33	1268.43		474.672	2124.09	1.41326e+07	664097	38134.1	134.804	1.25563e+06	436946		1.19892	0.136013	1.21428	15.4342	0.185918	0.191258
Male	24	HIV-negative	TBM	Follow-up < 60 days	34	58645.4	1500.69	9184.72	4011.32	1361.67	2.18722e+06	394951	71117.9	18.8436	580648	755318		1.52451	1.08576	0.187193	8.98159	0.36991	0.085189
Male	26	HIV-negative	TBM	Alive	60	3334.45	1662.83		599.469	3654.42	6.11942e+06	389057	27406.6	13.5287	613346	1.13754e+06		1.75178	0.169526	0.525293	8.84029	0.126077	0.0903273
Male	34	HIV-negative	TBM	Alive	60	49368.1	1464.5	8988.19	1646.87	1387.72	3.96032e+06	359319	43253.1		223869	291922		1.47377	0.450799	0.339648	8.12735	0.214473	0.0291236
Male	38	HIV-negative	Non-infectious control	Follow-up < 60 days	11	59.596	920.777			1523.48	390557	29442.7	25607.5	109.679	1.10987e+06	372342	909.351	0.711603	0.00854226	0.032712	0.218806	0.116041	0.168353
Male	48	HIV-negative	TBM	Dead	6	77.9537	1676.4		385.532	1443.94	1.27304e+06	70741.4	250314	312.127	1.31034e+06	464650	632.496	1.77081	0.112075	0.10859	1.20891	1.36951	0.199855
Male	29	HIV-negative	TBM	Dead	9	90317.5	2664.3	9192.53	5165.68	2037.7	3.48345e+06	403468	139670		531940	496458	553.71	3.15561	1.39576	0.298646	9.18578	0.752312	0.0775349
Male	38	HIV-negative	TBM	Alive	60	19405.7	1681.68	51.8885	1312.59	1275.28	2.8536e+06	417061	51007.8	100.499	370173	194881	614.824	1.77821	0.361031	0.24449	9.51167	0.257731	0.0521144
Male	26	HIV-negative	TBM	Alive	60	3752.15	745.068		315.334	1427.49	2.03326e+06	112263	4994.2		114737	1.33903e+06	678.148	0.4653	0.0932233	0.173955	2.20436	0.00105558	0.0119743
Male	15	HIV-negative	Non-infectious control	Dead	2		328.041			1242.37	176197	7342.32	221040	19.3267	243853	292211	733.371		0.00854226	0.0142809		1.20621	0.032264	2076.41	1254.81		77526.9	4712.9	1841.57	2.74825e+06	14692.9	474055	620.921	3.03822e+06	116692	244421	5.35531	0.0603242	6.6944	0.112527	15.5795	0.562388
Male	19	HIV-negative	TBM	Alive	60	3402.56	1578.37		369.933	1677.06	1.31074e+06	194191	14703.4	54.1149	655704	333225	2174.34	1.63339	0.107885	0.111831	4.16852	0.0552159	0.0969836
Male	30	HIV-negative	TBM	Alive	60	81885.2	1769.91	9439.57	3800.72	1594.78	3.15925e+06	253329	8802.01	158.962	477564	1.64457e+06		1.90189	1.0292	0.270771	5.58631	0.0222965	0.0689902
Male	42	HIV-negative	TBM	Alive	60	1505.06	502.242		385.532	1564.61	965097	141388	2948.15	59.4297	309050	661870		0.124915	0.112075	0.0821123	2.90262		0.0425093	12152.4	9071.54		6114.59	30202.6	2460.65	1.00802e+07	32249.9	510348	108.749	2.31508e+06	92198.2	199528	32.9369	0.25304	14.3174	0.147659	16.727	0.429194
Male	29	HIV-negative	TBM	Dead	11	12919.8	2122.09	103.777	625.097	1608.49	1.4017e+06	654406	123953	112.095	2.11574e+06	1.63968e+06	850.446	2.39555	0.176408	0.119652	15.2018	0.664636	0.326418
Male	47	HIV-negative	TBM	Alive	60	68555.9	1794.05	11682.3	4514.96	1439.83	7.33722e+06	340272	10876.1	108.713	1.52497e+06	1.0787e+06	5147.59	1.93572	1.22101	0.630002	7.6707	0.0338661	0.233583
Male	32	HIV-negative	TBM	Alive	60	12243.3	1535.38	134.543	520.357	863.897	5.86913e+06	452385	71516.7		917464	2.43435e+06	5800.7	1.57313	0.148281	0.503772	10.3585	0.372135	0.138117
Male	36	HIV-positive	Cryptococcal meningitis	Dead	6	528.648	532.407		772.178	1812.81	182173	41609.8	166927	299.081	2.44942e+06	988315	344.596	0.167199	0.215906	0.0147947	0.510503	0.904355	0.378854	3461.93	7539.7		78970.4	1323.63	1871.89	1.56354e+06	18776.4	596195	540.236	5.63154e+06	198486	133229	27.5318	0.0291849	8.4674	0.114248	19.4411	1.04005
Male	45	HIV-negative	TBM	Dead	1	168.678	1257.87		1061.88	991.424	1.44496e+06	172583	462721	141.568	1.39318e+06	640757	730.426	1.18412	0.293705	0.123372	3.65049	2.55437	0.212873
Female	20	HIV-negative	TBM	Alive	60	6528.95	699.067	92.7564	412.274	859.783	1.63286e+06	385922	59170	203.897	241099	947797		0.400817	0.119256	0.139528	8.76514	0.303261	0.0318312
Male	30	HIV-negative	TBM	Dead	1	33228.2	2125.86	4554.71	3228	1194.37	2.25772e+06	284771	40778.4	51.699	362617	566073	878.426	2.40084	0.875401	0.193255	6.34012	0.200669	0.0509269
Female	43	HIV-positive	Non-infectious control	Dead	1		892.121		201.68	1098.38	273919	8084.02	292121	47.3505	493001	4.26959e+06	1114.78	0.671433	0.0627022	0.0226832		1.60272	0.0714159	3566.72	3367.88		3312.89	2139.01	1657.71	7.34739e+06	32029.1	1.40164e+06	150.845	857842	4.7829e+06	96536.2	12.8114	0.18121	14.2215	0.102094	44.9058	0.160788
Female	55	HIV-negative	TBM	Alive	60	129.302	934.351		684.152	1586.55	1.98499e+06	59664.4	317740	387.501	505424	1.70223e+06	1896.75	0.73063	0.192267	0.169805	0.943349	1.74563	0.073368	1892.79	6480.45		3502.13	4270.78	1560.89	1.08036e+07	7034.79	776629	645.477	212355	205479	818880	23.7942	0.272054	3.36935	0.0965991	25.1457	0.0418972
Male	31	HIV-negative	Non-infectious control	Dead	0	1088.16	1032.39	4166.69	3407.39	1468.62	376411	27201.4	74043.1	132.871	66401.6	223767	395.402	0.868053	0.923576	0.0314957	0.165073	0.386227	0.00437872	6035.42	9348.58		13612.7	3594.92	697.314	4.44618e+06	26721.6	286895	1224.3	113810	88161.6	32704.2	33.9145	0.104953	11.9171	0.0475929	9.66235	0.0237463
Female	38	HIV-negative	TBM	Alive	60	12444.4	1482.59		790.007	2284.53	3.1838e+06	299414	16353.1		127423	150635	410.128	1.49914	0.220694	0.272881	6.69116	0.0644185	0.0139678	3588.05	9239.94		89994.9	5114.24	1073.84	3.07805e+06	12008.7	1.02043e+06	109.918	259750	109484	635156	33.5311	0.0689929	5.52898	0.0689603	32.8535	0.0506268
Male	45	HIV-negative	TBM	Dead	18	1595.52	1461.48		388.875	1704.48	3.11148e+06	243454	14578.6	31.8891	1.23284e+06	253594	3453.33	1.46954	0.112972	0.266663	5.34956	0.05452	0.187677	3418.34	5095.27		41543.2	4745.51	529.098	4.42842e+06	12618.5	935853	218.667	212408	110496	833893	18.9065	0.104486	5.79371	0.0380469	30.1796	0.0419069
Male	48	HIV-negative	Non-infectious control	Follow-up < 60 days	12		511.292			1682.54	69176.4	2914.53	187863	71.9921	146068	425781	924.814	0.1376	0.00854226	0.005079		1.02114	0.0168978	1748.12	885.426		19895.8	2813.97	1003.43	2.43099e+06	6976.63	876402	257.255	129671	151982	182893	4.05194	0.0519852	3.3441	0.0649643	28.3001	0.0266677
Male	47	HIV-negative	TBM	Alive	60	2433.33	898.908		197.223	1028.45	1.35489e+06	240074	66108.4	49.7663	90386.4	316288		0.680947	0.0615053	0.115628	5.26853	0.341966	0.00814777	3624.22	972.339		36797.2	6037.43	418.584	3.8824e+06	4835.85	846440	254.917	246695	126632	927515	4.35861	0.0901347	2.4146	0.0317755	27.3528	0.0482221
Male	36	HIV-negative	TBM	Dead	4		760.904			1485.08	226248	10992.3	132095	164.76	142469	233324		0.487499	0.00854226	0.0185843		0.710058	0.0163322	4623.94	8941.17		930.055	4349.6	7812.26	4.6174e+06	31503	856845	160.2	392089	87509.3	131566	32.4769	0.109454	13.9931	0.451353	27.6817	0.0750021
Male	38	HIV-negative	TBM	Alive	60	52512.3	1742.01	10888.8	2934.95	1844.35	4.27329e+06	177052	6612.54	83.105	95311.1	1.19245e+06	354.905	1.86278	0.796704	0.366558	3.75763	0.0100831	0.00892166	3350.64	3031.09		15446.3	2048.42	643.524	4.3391e+06	11688	1.20679e+06	330.924	200238	297567	188490	11.623	0.102139	5.38971	0.0445404	38.7454	0.0396654
Male	25	HIV-negative	TBM	Alive	60	1604.57	766.183		279.678	1918.4	1.0829e+06	89098.4	4401	224.673	75548.4	2.07866e+06		0.494898	0.0836481	0.0922409	1.64901		0.00581609	6208.84	6170.82		1796.64	2150.79	1111.99	2.74726e+06	11166.4	637084	312.214	798796	258339	328276	22.7016	0.0602982	5.16326	0.0711247	20.7338	0.149913
Female	24	HIV-negative	TBM	Alive	60	1126.47	1432.82		413.388	1519.36	7.86742e+06	301399	24595	89.3861	2.75425e+06	802371	3369.39	1.42937	0.119555	0.675589	6.73874	0.110394	0.426756	1061.85	6377.24		24699.5	7243.29	124.206	510830	8604.03	772579	570.639	65109.8	130161	79758.5	23.43	0.00151499	4.0507	0.0150701	25.0176	0.0147763
Male	21	HIV-negative	TBM	Alive	60	5353.53	1162.09			12944.7	225213	399929	19561.8	148.333	87857.3	184885		1.04987	0.00854226	0.0184953	9.10093	0.0823173	0.00775034	2987.1	3139.73		9629.41	4791.72	494.868	466713	4598.69	1.23134e+06	466.567	244035	80711.1	584871	12.0063	0.000355418	2.31163	0.0361045	39.5216	0.0477323
Male	50	HIV-negative	Non-infectious control	Follow-up < 60 days	13	719.143	727.723	3471.48	1480.84	2044.56	100840	6771.11	19617		12846.2	355684	545.611	0.440986	0.406214	0.00780151		0.082625		6817.2	5562.43		1737.79	3233.43	1437.66	7.76502e+06	43606.2	586677	307.537	612979	123706	207549	20.5549	0.192187	19.2482	0.0896061	19.1402	0.115688
Female	36	HIV-negative	TBM	Alive	60	1128.6	941.138			2971.53	8.69032e+06	265522	467241	199.065	1.11974e+06	417447	5039.35	0.740144	0.00854226	0.746344	5.87863	2.57958	0.169903	2171.93	2781.22		2975.94	7610.21	301.224	6.18093e+06	4151.63	452137	223.344	389005	227976	29801.9	10.7413	0.15055	2.11753	0.0251155	14.8866	0.074434
Male	54	HIV-negative	TBM	Dead	3		551.26			2960.56	136913	3062.62	106983	98.5663	165443	562713	1139.08	0.193626	0.00854226	0.0109032		0.569973	0.0199424	1094.31	5654.78		3200.96	6978.75	42.054	826280	7586.34	691731	438.503	18745.1	107417	127232	20.8808	0.00980642	3.60883	0.0104081	22.4615	0.00623647
Female	21	HIV-negative	TBM	Alive	60	1160.79	1249.57		365.476	988.682	51908.1	67361.4	4043.73	117.893	111430	1.83211e+06	1229.65	1.1725	0.106688	0.00359423	1.12788		0.0114546	3627.93	4638.98		23748.7	5701.32	821.52	74319.5	13988.7	859813	562.453	72664.2	167332	96493.3	17.2965	-0.00995841	6.38865	0.0546413	27.7756	0.0161677
Male	23	HIV-negative	TBM	Alive	60	9881.5	1626.63		856.862	1294.47	3.53146e+06	429602	13202.2	101.465	59848.7	243093		1.70104	0.238647	0.302774	9.81232	0.0468416	0.00334898	4433.82	1939.25		6032.66	4410.3	1084.6	2.09491e+06	17758.7	882368	275.965	259289	94898.9	270148	7.77038	0.0431516	8.02553	0.0695708	28.4887	0.0505418
Male	40	HIV-negative	TBM	Alive	60	4366.74	1495.41		1391.7	1049.02	1.55515e+07	134780	4837.2	69.0931	83143.1	2.01702e+06		1.51711	0.382276	1.33629	2.74419	0.000179818	0.00700953	1976.26	1966.41		28882.5	3587.67	284.598	4.18085e+06	14495.7	1.61879e+06		126903	400168	303202	7.86621	0.0979792	6.60879	0.024172	51.7711	0.026158
Male	31	HIV-negative	TBM	Dead	5	8436.29	940.384		277.449	968.113	1.65576e+06	532741	78216.7	133.354	133274	300025		0.739087	0.0830496	0.141497	12.285	0.409509	0.0148873	4519.14	836.538		19976.6	5764.74	1766.27	4.32527e+06	14572.1	971667	350.803	316569	172297	1.1464e+06	3.87943	0.101775	6.64193	0.108254	31.3119	0.0610922
Male	37	HIV-positive	Cryptococcal meningitis	Follow-up < 60 days	6	86.7335	497.717	51.8885		1623.58	691927	38858.3	22302	147.366	903394	233368	775.341	0.118572	0.00854226	0.0586244	0.444538	0.097603	0.135906	2916.62	6284.9		8095.86	20678		2.40257e+06	27103.3	371858		430072	96117.5	265938	23.1041	0.0512383	12.0828	0.00802162	12.3485	0.0819981
Male	17	HIV-negative	TBM	Dead	3	853.5	474.34			1378.12	370781	122436	10788.7	33.3386	61560.1	106254		0.0858026	0.00854226	0.0310116	2.44826	0.0333785	0.00361791
Male	49	HIV-negative	TBM	Alive	60	13421.3	1239.77		315.334	1807.33	3.36287e+06	589170	8904.69	35.2713	791140	4.45267e+06	112.656	1.15875	0.0932233	0.288278	13.6379	0.0228693	0.118266	3277.38	2439		3938.31	3986.3	1363.33	4.03672e+06	8186.96	875587		136201	268583	18312.9	9.53376	0.0941909	3.86961	0.0853882	28.2743	0.0278704
Male	39	HIV-negative	Non-infectious control	Follow-up < 60 days	6	387.374	431.355	2173.35	3443.05	850.184	252458	4900.69	184218	54.598	127153	529710	859.282	0.0255482	0.933151	0.020838		1.00081	0.0139253
Male	47	HIV-negative	TBM	Alive	60	5963.86	950.942		1070.8	958.514	638643	294397	127461	179.739	78027.4	852712		0.753886	0.296099	0.054043	6.57089	0.684206	0.00620563
Female	52	HIV-negative	TBM	Dead	45	51218.5	3090.37	9523.6	4306.59	1404.18	1.59313e+07	517988	29837.9	126.107	401425	1.365e+06	1317.27	3.75286	1.16505	1.36894	11.9313	0.13964	0.0570253
Female	22	HIV-negative	TBM	Alive	60	6014.67	1493.91		346.533	1393.21	3.09719e+06	325647	6141.55	59.4297	67547.4	211033		1.51499	0.101602	0.265434	7.32008	0.00745578	0.00455878	2221.09	2601.96		79798.9	2597.44	332.52	1.72079e+06	10844.8	1.1555e+06	308.706	698364	76549	720083	10.1088	0.0333181	5.02359	0.0268915	37.1239	0.131414
Female	41	HIV-negative	TBM	Dead	3	16203.2	1152.29	4072.1	3274.79	1055.87	3.31626e+06	185101	32962.5	100.499	323178	2.93057e+06	546.347	1.03613	0.887968	0.284271	3.9506	0.15707	0.0447294	3130.85	3856.76		901.207	8046.89	365.772	1.89561e+06	7094.76	423836	434.995	371840	462296	173251	14.5364	0.037913	3.39539	0.0287785	13.9918	0.0712725
Male	29	HIV-positive	TBM	Dead	10	27.9356	486.406		140.396	884.466	431263	25686.9	106676	56.0475	757188	199814	726.745	0.102716	0.0462448	0.036212	0.128764	0.568264	0.112931	830.936	6073.05		41033.2	19074.5	346.212	730693	10100.6	800548	416.286	2.21061e+06	81058.7	30594.5	22.3566	0.00729396	4.70048	0.0276685	25.9019	0.409952
Female	14	HIV-negative	TBM	Alive	60	15303.1	1496.17		942.659	1225.91	1.08856e+07	434622	14346.1	274.44	1.74315e+06	601410		1.51817	0.261688	0.935099	9.93267	0.0532229	0.267868	3484.18	1830.61		10551.4	5215.71	705.138	2.43386e+06	8312.35	555155	555.437	1.37985e+06	175773	297825	7.38703	0.0520605	3.92405	0.0480369	18.1436	0.256937
Male	37	HIV-negative	Bacterial meningitis	Follow-up < 60 days	9	567.492	800.873			3670.88	1.32387e+06	460529	43721.5	18.3604	2.38834e+06	375651	847.501	0.543525	0.00854226	0.11296	10.5538	0.217086	0.369255	1856.62	9098.7		3723.68	15038.3	306.114	3.01841e+06	37028.5	1.49739e+06		124650	148474	122148	33.0328	0.0674252	16.3922	0.025393	47.9331	0.025743
Male	33	HIV-negative	TBM	Alive	60	3114.96	2795.51		545.985	1709.97	2.0014e+06	125453	17127.1	106.78	81316.6	4.10897e+06	435.899	3.33954	0.155163	0.171215	2.52058	0.0687358	0.00672252	3366.4	2167.39		14740.1	4926.71	2352.09	2.34166e+06	14828.3	645971	360.157	1.01212e+06	319477	205895	8.5754	0.0496371	6.75319	0.141498	21.0148	0.189205
Female	18	HIV-negative	TBM	Alive	60	8396.12	800.873		1001.71	1305.44	6.65393e+06	476016	16321.7	283.137	80112.1	377463	4401.7	0.543525	0.277547	0.571251	10.9251	0.0642434	0.00653323	2101.45	2270.6		13334.6	918.661	481.176	2.98773e+06	11139.2	2.06265e+06	443.181	537311	169682	119181	8.93958	0.0666188	5.15142	0.0353275	65.8043	0.10175
Male	29	HIV-negative	TBM	Alive	60	110692	1464.5	16099.7	3628.01	1742.88	6.7095e+06	303194	11644.9	61.8455	565848	620071	2583.74	1.47377	0.982823	0.576029	6.78179	0.038155	0.0828633	2484.46	956.043		22246.3	2520.43		1.79838e+06	7166.54	1.16815e+06		810473	143131	303238	4.30111	0.0353575	3.42656	0.00802162	37.5239	0.152064
Male	35	HIV-negative	TBM	Alive	60	21120.1	1533.12	5206.76	5624.76	1435.71	2.38871e+06	312387	70062.2	91.3188	1.22488e+06	2.24367e+06	1991.74	1.56996	1.51904	0.204518	7.00219	0.364021	0.186425	1752.76	4030.59		12650.4	3529.69		1.26218e+06	5269.28	981640	157.861	831496	130674	269353	15.1498	0.0212637	2.60279	0.00802162	31.6272	0.155936
Male	22	HIV-negative	Non-infectious control	Follow-up < 60 days	19	1293.82	673.427	4938.59	2260.82	1808.7	82469.7	3121.11	77551.3	50.2495	499125	246576		0.364876	0.615672	0.00622199		0.405797	0.0723783
Female	60	HIV-negative	Bacterial meningitis	Follow-up < 60 days	14	7244.64	1459.97	132.706	777.75	1223.17	1.16972e+06	1.38331e+06	444828		234126	810635	1215.66	1.46743	0.217402	0.0997063	32.6767	2.45456	0.0307355	2409.34	3509.11		1943.19	2908.19	831.3	223796	3753.64	603146		46739	56633.8	14531.4	13.3097	-0.00602951	1.94473	0.0551963	19.6609	0.0113926
Male	30	HIV-negative	TBM	Dead	34	3672.34	917.007	881.186		1486.45	5.86847e+06	210477	602119	53.1485	1.72136e+06	1.40307e+06		0.706317	0.00854226	0.503715	4.55897	3.33196	0.264444	3377.53	5692.8		3992.54	7064.81	482.154	3.48505e+06	8566.77	635918	259.594	840542	403462	86816.2	21.0149	0.0796907	4.03452	0.035383	20.697	0.157602
Male	35	HIV-positive	Cryptococcal meningitis	Follow-up < 60 days	28	12372.6	1191.51	4132.25	2695.38	1681.17	34781.9	27114.3	38331		592682	339390	1457.91	1.0911	0.732371	0.00212168	0.162984	0.187016	0.0870801	2459.42	4465.16		7038.88	7247.82	321.762	164670	16845.5	957643		223620	41801.7	22302	16.6831	-0.0075836	7.62903	0.026281	30.8686	0.0439721
Male	20	HIV-negative	TBM	Alive	60	5081.89	704.346	21.5819	660.753	1781.27	3.16129e+06	315695	14112.7	116.444	169056	138395		0.408216	0.185983	0.270945	7.08149	0.0519211	0.0205102	3060.37	2259.74		25024.9	3213.5	521.274	1.21327e+06	8328.71	622663	170.724	287181	97955.2	73160.5	8.90124	0.0199781	3.93116	0.0376029	20.2779	0.0556792
Male	25	HIV-negative	TBM	Dead	54	5884.04	1186.23			5232.75	3.66532e+06	684752	11171.4	139.636	409869	221218	1531.54	1.0837	0.00854226	0.314283	15.9294	0.0355135	0.0583523	3833.81	4003.43		3206.73	3847.69	4313.96	2.2639e+06	46777.4	890338	528.543	433953	117401	390931	15.0539	0.0475932	20.6251	0.252831	28.7407	0.082713
Male	42	HIV-positive	TBM	Alive	60		404.207			942.059	11316.2	6834.58	39915.4	341.117	106283	157276	1357.77		0.00854226	0.000104056		0.195855	0.0106458	1991.09	3286.4		46283.5	7036.73	50.856	322641	16622	418333	1151.8	174452	30248.3	80758.6	12.5238	-0.00343143	7.53198	0.0109076	13.8178	0.0349159
Female	25	HIV-negative	TBM	Dead	3	17494.9	1051.24	470.211	771.064	1287.62	6.22311e+06	638313	51594.3	63.295	440407	324159	946.903	0.89448	0.215607	0.534208	14.816	0.261002	0.063151	2421.4	2210.85		15531.7	5436.77	263.082	1.20854e+06	12275	968480		394278	84409	232452	8.72874	0.0198538	5.64458	0.022951	31.2112	0.0754052
Female	51	HIV-negative	Non-infectious control	Alive	60		517.324			1796.36	73605.6	3805.56	158422		2.23802e+06	2.10183e+06	615.561	0.146057	0.00854226	0.00545983		0.856912	0.345633	1464.34	6518.48		15906.7	4771.78	179.952	2.30022e+06	10895.7	893406		325785	93374.7	186713	23.9283	0.048548	5.04569	0.0182336	28.8376	0.0627896
Male	25	HIV-negative	Non-infectious control	Alive	60		725.461			2272.19	156917	5613.76	112981	280.238	1.0883e+06	1.96217e+06	667.103	0.437815	0.00854226	0.0126231		0.603432	0.164963
Male	33	HIV-positive	Cryptococcal meningitis	Dead	3	1327.08	1078.39		823.434	2061.01	956873	51503.3	88500.4	137.22	1.50448e+06	1.05591e+06	542.665	0.932535	0.22967	0.0814051	0.747691	0.466874	0.230363	2464.99	3362.45		5011.45	10999.5	300.246	5.27111e+06	21464.2	945865	280.642	499895	108336	24980	12.7922	0.126636	9.6344	0.02506	30.4962	0.0948587
Female	56	HIV-negative	TBM	Dead	8	7629.35	1807.62		544.871	1864.92	1.50135e+06	324957	5799.55	89.3861	129032	189200	1020.53	1.95475	0.154864	0.128221	7.30355	0.00554803	0.0142206	1879.81	2612.82		21325.5	3293.23	287.532	1.14331e+06	4451.49	679356	295.843	122274	69737.4	71674.4	10.1471	0.0181394	2.24772	0.0243385	22.0703	0.0253054
Male	17	HIV-negative	TBM	Alive	60	5576.48	995.435		644.039	1350.7	1.24079e+06	120911	8374.3	68.1267	196619	893703	1516.08	0.816255	0.181495	0.105817	2.41168	0.0199106	0.0248416
Male	30	HIV-negative	TBM	Alive	60	15384.5	1299.34	6938.82	3707.13	1310.93	1.58189e+06	85319	10409.3	157.03	1.0794e+06	1.42426e+06	366.686	1.24226	1.00407	0.135146	1.5584	0.0312624	0.163564	7317.99	3128.87		1765.49	7120.98	2497.81	3.9972e+06	41836.2	411508	1421.92	689207	289800	112441	11.968	0.0931522	18.4796	0.149768	13.6021	0.129728
Male	20	HIV-negative	TBM	Alive	60	4373.39	796.348		590.555	1228.65	5.68155e+06	242722	3985.17	417.457	76186.2	1.10667e+06	6559.11	0.537182	0.167132	0.487643	5.33202		0.00591631	2370.39	3172.32		16786	13090.5	246.456	3.55218e+06	10457.7	1.1265e+06	1130.75	95386	219516	218439	12.1213	0.0814551	4.85553	0.0220075	36.2072	0.0203528
Male	56	HIV-negative	TBM	Dead	7	70.2381	478.864	345.311	1103.11	1427.49	5.22544e+06	1.322e+06	362793	39.6198	2.55928e+06	2.38934e+07	15749.8	0.0921451	0.304776	0.448426	31.207	1.99695	0.396118
Female	63	HIV-positive	Cryptococcal meningitis	Dead	23	740.693	1287.28		276.335	2499.82	2.35378e+06	98938.4	25217.1	41.0693	1.25276e+06	249335	1789.25	1.22535	0.0827504	0.201514	1.88491	0.113864	0.190806	389.501	3492.82		291.94	4378.59	29.34	376699	6766.73	467692	192.941	182803	92080	54870.4	13.2522	-0.00201054	3.25297	0.00968661	15.3784	0.036454
Male	42	HIV-positive	Cryptococcal meningitis	Follow-up < 60 days	16	1081.77	877.038	22.0411		1288.99	447961	116168	16501.6		321044	518367	3099.16	0.650291	0.00854226	0.0376477	2.29798	0.0652469	0.0443941	1176.85	6974.77		6599.23	4384.93	309.048	446331	10718.5	573922	105.241	448611	178179	26309.4	25.5384	-0.000180317	4.96876	0.0255595	18.7369	0.0854129
Male	22	HIV-negative	Non-infectious control	Follow-up < 60 days	7		795.594		393.332	1374.01	949121	16618.5	151606	157.513	3.22818e+06	958012	665.63	0.536125	0.114169	0.0807386		0.818894	0.50123
Male	34	HIV-negative	TBM	Dead	11	2725.72	821.234		690.838	1064.1	1.4987e+06	216381	71522.7	92.2851	114211	171049		0.572066	0.194063	0.127992	4.7005	0.372168	0.0118916	1790.78	1243.94		26574.6	898.73	391.2	710911	11357.2	1.08782e+06	344.956	119961	61605.9	124875	5.31697	0.006774	5.24611	0.0302215	34.9841	0.0248792
Female	33	HIV-negative	TBM	Dead	15	112068	2472	12074.9	3885.41	1439.83	5.0917e+06	857076	57505	75.3743	1.34863e+06	743307	714.964	2.88605	1.05194	0.436926	20.0607	0.293974	0.205872
Female	27	HIV-negative	Non-infectious control	Follow-up < 60 days	5	889.949	844.611	4139.6	3214.62	1310.93	92913.7	2035.94	104983	32.3723	235497	2.37187e+06	684.038	0.604836	0.87181	0.00711999		0.558815	0.0309509	2890.66	2085.91		25851.1	2936.27	384.354	713866	6711.31	640664	118.104	291707	373899	37717	8.28789	0.00685167	3.2289	0.029833	20.847	0.0565129
Male	17	HIV-negative	TBM	Alive	60	6270.88	1505.97		1298.11	1657.86	4.67424e+06	513650	15683.6	139.636	120652	166784	1297.39	1.53191	0.357141	0.401032	11.8273	0.0606835	0.0129038	1744.41	2009.86		4871.82	5148.67	997.56	928729	7806.23	981796	142.66	104937	79361.7	123672	8.01955	0.0124992	3.7043	0.0646313	31.6322	0.0221119
Male	24	HIV-negative	TBM	Dead	1	12432.4	1384.56		1300.34	3195.05	4.11154e+06	514428	25817.1	114.028	2.0214e+06	215877	276.119	1.36172	0.357739	0.352651	11.846	0.117211	0.311594	4257.62	1455.79		13935.8	1334.5	1543.28	1.34521e+06	9824.35	637993	101.733	538325	85096.3	133893	6.0645	0.0234463	4.58054	0.0956001	20.7626	0.101937
Female	29	HIV-positive	Non-infectious control	Follow-up < 60 days	21		454.733			1438.46	795899	20558.5	50380.7	114.994	400596	365750	512.476	0.0583181	0.00854226	0.0675642	0.00581359	0.254233	0.0568951	3114.16	7121.43		2092.05	4222.76	615.162	3.84823e+06	36407.9	359948	155.522	530438	89499.4	181032	26.0559	0.0892364	16.1227	0.0429309	11.972	0.100484
Female	17	HIV-negative	TBM	Alive	60	4078.6	886.088		942.659	2276.3	3.19508e+06	216871	3967.35		1.74148e+06	204729	5373.64	0.662976	0.261688	0.273851	4.71226		0.267607	1471.76	1960.97		9010.91	3320.41	407.826	2.22744e+06	3603.72	810355		159564	96705.3	297230	7.84705	0.0466349	1.87963	0.031165	26.2119	0.0321736
Female	31	HIV-negative	TBM	Alive	60	2046.48	722.444		407.817	1862.18	1.24308e+06	53011.6	5732.51	171.525	91622.8	245692		0.433587	0.118059	0.106014	0.783851	0.00517406	0.00834206	6810.71	2020.73		37796.5	7750.64	307.092	1.57756e+06	14975.5	489306	434.995	331853	363296	143747	8.05789	0.0295532	6.8171	0.0254485	16.0617	0.0639073
Female	19	HIV-negative	TBM	Alive	60	1911.86	887.596		233.993	1349.32	1.48218e+06	259551	18860	87.4535	396923	252682	4665.3	0.66509	0.0713798	0.126573	5.73548	0.0784024	0.056318	4448.66	4964.91		16015.2	2859.27	810.762	3.24852e+06	28413.6	437090	624.429	63115.5	95021.6	29723.1	18.4465	0.0734735	12.6517	0.0540308	14.4109	0.014409
Female	40	HIV-negative	Non-infectious control	Follow-up < 60 days	1	14.899	713.395		359.904	1810.07	555511	4890.73	130405	124.174	22601.5	827723	1649.35	0.420902	0.105192	0.0468951		0.700628
Female	36	HIV-negative	TBM	Alive	60	9714.95	950.942	3300.66	2838.01	1003.77	1.92681e+06	102415	47778.8	138.186	2.07644e+06	4.2126e+06	882.107	0.753886	0.770672	0.164802	1.96827	0.239719	0.320242	1797.27	4763.92		7800.46	4809.83	251.346	487296	9265.53	281657	848.942	1.4114e+06	761898	11539.8	17.7373	0.000896433	4.33791	0.022285	9.49675	0.262747
Male	43	HIV-negative	TBM	Alive	60	5591.12	760.15	45.0006		1763.45	3.61587e+06	230468	17541.2		69613.8	1.08335e+06	4420.85	0.486441	0.00854226	0.310032	5.03824	0.0710459	0.00488349	3137.34	619.255		14247.4	6018.41	535.944	2.44814e+06	10832	611716	177.74	88289.4	160844	104800	3.11275	0.052436	5.01807	0.0384354	19.9318	0.0190457
Female	29	HIV-negative	Non-infectious control	Follow-up < 60 days	0		999.96		274.107	2427.14	130124	1431.13	116247	298.115	101056	856246	999.918	0.822598	0.0821519	0.0103194		0.621652	0.00982444
Female	16	HIV-negative	TBM	Alive	60	7508.83	896.645		548.213	1456.28	5.77916e+06	376108	29764.9	424.222	121067	382892	7488.34	0.677776	0.155762	0.496036	8.52986	0.139233	0.0129691	1777.8	5866.63		3999.47	7308.52	340.344	2.1926e+06	12055.1	1.10957e+06	333.262	1.95925e+06	95672.1	244991	21.6283	0.0457193	5.5491	0.0273355	35.6718	0.363656
Female	35	HIV-negative	Non-infectious control	Dead	2	1398.91	1018.06	5952.48	2384.5	1829.27	325841	22161.4	86817.6		1.74044e+06	182353	3161.01	0.847968	0.648886	0.0271476	0.0442411	0.457486	0.267443
Male	27	HIV-negative	TBM	Alive	60		529.39			1428.86	252375	5028.87	86209.9		43583.4	325132	592.735	0.16297	0.00854226	0.0208308		0.454097	0.000793002	4041.54	1412.34		20186.6	4728.3	537.9	7.54809e+06	16930	888809	108.749	344283	72860.9	32803.1	5.91116	0.186485	7.66572	0.0385464	28.6923	0.0661968
Female	24	HIV-negative	TBM	Dead	2		745.068			1195.74	710704	7190.5	128799	27.5406	31432.5	557878	684.038	0.4653	0.00854226	0.060239		0.691671		3751.27	1798.01		11159.5	4923.08	169.194	1.14989e+06	3976.26	722724		82544	119126	27789.4	7.27203	0.0183123	2.04139	0.0176231	23.4414	0.0179875
Male	48	HIV-negative	TBM	Dead	16	33656	1667.35	5612.22	2478.1	1989.71	8.34911e+06	703585	30315.7	60.8792	596737	543321	6777.06	1.75813	0.674021	0.717006	16.3809	0.142305	0.0877173	1861.26	2390.11		4506.03	15712.4	533.01	7.47614e+06	5407.39	587543	429.148	137842	125445	304656	9.36126	0.184594	2.66276	0.0382689	19.1676	0.0281727
Male	33	HIV-negative	TBM	Alive	60	9859.95	1271.44		1289.19	1391.83	6.17141e+06	491826	51025.7	192.784	65102.8	456233	6830.07	1.20315	0.354747	0.529762	11.3041	0.25783	0.00417462	3532.41	2819.24		30601.8	3708.17	357.948	4.8133e+06	12451.3	897998	438.503	2.11181e+06	104881	70747.8	10.8755	0.114603	5.72111	0.0283345	28.9828	0.391755
Female	21	HIV-negative	Non-infectious control	Follow-up < 60 days	8		622.901			990.053	511306	10429.8	91294.9	76.8238	48087.1	299162	898.306	0.29405	0.00854226	0.0430943		0.482462	0.00150072
Male	48	HIV-negative	Non-infectious control	Follow-up < 60 days	15	31.9264	1038.42		1280.28	1528.96	215749	19902.7	223513		757160	90304.9		0.876509	0.352353	0.0176817		1.22001	0.112927
Male	31	HIV-negative	TBM	Alive	60	21425	797.856	204.799	622.868	1206.71	7.2908e+06	372121	27633.1	75.8574	171677	6.29991e+06	3889.96	0.539296	0.17581	0.62601	8.43427	0.127341	0.0209221	4488.54	2830.1		28129	3744.41	762.84	1.62441e+06	10521.3	564427	59.6364	93475.2	321395	10637.8	10.9138	0.0307848	4.88314	0.0513114	18.4367	0.0200009
Male	25	HIV-positive	Non-infectious control	Dead	1		644.77		807.835	2387.37	96388.5	12356.3	68104.4	166.21	345022	185018	441.054	0.324706	0.225481	0.00741876		0.3531	0.048162	6853.37	13145.6		1661.64	4052.44	3142.31	1.30933e+07	106021	977900	287.658	97837.2	99879.9	357304	47.3123	0.332238	46.3476	0.186342	31.509	0.0208043
Male	16	HIV-negative	TBM	Alive	60	9828.28	667.394	800.368		766.537	8.02874e+06	315920	298620	155.58	295777	1.13342e+06	1238.48	0.356419	0.00854226	0.68946	7.08689	1.63897	0.0404235	4118.51	2466.16		96034.5	4521.73	803.916	2.41865e+06	8791.21	759223	270.118	312153	129032	46062.1	9.6296	0.0516608	4.13197	0.0536423	24.5953	0.0602788
Female	23	HIV-negative	TBM	Alive	60	3854.32	1190		1007.29	970.856	3.17703e+06	493934	24634.1	256.079	343797	4.17806e+06		1.08899	0.279043	0.272299	11.3546	0.110612	0.0479695	2030.97	3601.46		616273	2081.03	774.576	2.51753e+06	7720.82	656875	1254.7	1.04491e+06	410693	178665	13.6355	0.05426	3.66722	0.0519774	21.3595	0.195245
Female	37	HIV-negative	TBM	Alive	60	3273.26	1392.85		2277.54	2109.01	2.69926e+06	227455	48650.4		572962	2.27398e+06	648.695	1.37334	0.620161	0.231219	4.96601	0.24458	0.0839813	2479.83	3704.67		5972.66	3873.96	97.8	876958	6384.19	591901		750063	217367	84977.1	13.9997	0.0111384	3.08687	0.0135716	19.3053	0.140937
Male	20	HIV-negative	TBM	Dead	1	73.4308	778.249			2226.93	869429	58726.1	83220.2	204.863	151841	713247	740.735	0.511812	0.00854226	0.0738865	0.920854	0.43742	0.017805	6183.8	6963.9		3375.2	6078.2	5632.3	7.82741e+06	69865.4	292657	289.997	259212	115747	659186	25.5	0.193827	30.6495	0.327644	9.8445	0.0505277
Male	74	HIV-negative	TBM	Dead	5	802.151	757.888	4567.56	2618.5	802.19	2865.98	155.558	2433.88		194164	15604.9	285.691	0.48327	0.711724				0.0244557	4851.15	20408.3		15883.6	8805.2	293.4	3.82268e+06	31516.6	530280	516.849	512948	118185	1.83222e+06	72.9389	0.088565	13.999	0.0246715	17.3572	0.0972629
Female	67	HIV-negative	TBM	Dead	27		1087.44		652.953	1697.63	117310	17966.3	79431.1	1773.71	396311	305117	2627.18	0.945221	0.183889	0.00921764		0.416283	0.0562218	2004.08	1656.78		7829.31	7919.15	481.176	594866	24681.7	278350	394.068	140447	28164.1	89054.6	6.77368	0.00372383	11.0314	0.0353275	9.3922	0.0286526
Male	29	HIV-positive	Cryptococcal meningitis	Dead	2	6743.66	934.351	4363.68	2723.24	1513.88	562286	39347.4	57400.6	334.352	1.53451e+06	307231	1399	0.73063	0.739851	0.0474777	0.456263	0.293391	0.235081	2996.38	3373.31		29491.7	4321.51	302.202	3.62321e+06	11905.2	829977	1204.42	263359	102621	10819.9	12.8305	0.083322	5.484	0.025171	26.8323	0.0512915
Male	18	HIV-negative	TBM	Alive	60	20810.7	2487.08	168.523	2260.82	1298.59	1.15235e+07	1.58551e+06	92776.6	119.826	167343	442598		2.90719	0.615672	0.989944	37.5242	0.490728	0.0202409	11051.6	7463.65		4659.5	5425.9	5499.29	2.60826e+07	39048.4	1.2271e+06	358.988	50566.1	110457	5.5374e+06	27.2634	0.673653	17.2692	0.320096	39.3875	0.0120975
Male	20	HIV-negative	TBM	Dead	3	3293.21	699.821		143.739	962.628	2.31618e+06	388029	78377.1	136.253	78575.8	821796	6861.74	0.401874	0.0471425	0.198281	8.81565	0.410403	0.00629181	4342.94	3547.14		21392.4	6508.54	783.378	4.58782e+06	8991.12	1.06577e+06		519205	150858	734703	13.4439	0.108676	4.21876	0.0524769	34.2871	0.0984154
Female	19	HIV-negative	Non-infectious control	Follow-up < 60 days	25		705.854			1441.2	600136	3189.55	68472.7	66.1941	896957	723828		0.410331	0.00854226	0.0507321		0.355154	0.134895
Female	27	HIV-negative	TBM	Alive	60	5095.19	1328		756.579	2277.67	2.82735e+06	249386	31740.5		32606.5	648878	5357.44	1.28243	0.211717	0.242233	5.49179	0.150253		997.865	2976.77		14234.7	2676.26	185.82	3.75994e+06	4834.94	699496	148.506	311398	97873.7	8093.72	11.4313	0.086916	2.41421	0.0185666	22.707	0.0601397
Male	30	HIV-negative	TBM	Dead	7		1133.44			1679.8	1198.22	730.499	1814.37	98.5663	88364.1		389.512	1.0097	0.00854226				0.00782998	3587.12	1004.93		4600.66	4774.5	1141.33	3.14151e+06	7669.03	1.06919e+06	205.804	86122.6	291261	386550	4.47362	0.0706608	3.64473	0.0727897	34.3951	0.0186466
Male	16	HIV-negative	TBM	Alive	60	58817.3	1490.14	9632.89	3375.08	1686.66	2.96632e+06	133480	7905.85	68.1267	256883	467388	3919.41	1.50971	0.914899	0.254181	2.71301	0.0172975	0.0343116	2010.57	2303.19		4211.79	4077.81	152.568	1.49023e+06	11378.1	1.23617e+06		484371	100546	321183	9.05458	0.0272578	5.25518	0.0166796	39.6745	0.0919993
Male	24	HIV-negative	TBM	Dead	41	6034.36	2389.04	8576.75	489.158	936.574	4.1964e+06	300624	680169		107953	211321	2365.05	2.76977	0.139903	0.359947	6.72019	3.76735	0.0109082	583.325	4954.04		725.812	4615.96		816868	9661.7	754258		1.05876e+06	119032	72981	18.4082	0.00955903	4.50992	0.00802162	24.4384	0.197795
Male	35	HIV-negative	TBM	Alive	60	30.0641	638.737		305.306	1117.58	1.08781e+06	22219.9	142499	159.929	412201	633697	1114.05	0.316249	0.0905303	0.0926637	0.0456433	0.76809	0.0587187
Male	36	HIV-positive	Cryptococcal meningitis	Dead	3	158.568	542.964	25.7146		1391.83	26706.4	24162.5	64280.4	190.851	127187	159882		0.181998	0.00854226	0.00142734	0.0922158	0.331769	0.0139307	2986.18	4215.28		1330.46	7737.05	1543.28	221627	13922.4	632338	791.644	333635	48964.6	76166.1	15.8014	-0.00608651	6.35985	0.0956001	20.5838	0.0642356
Female	39	HIV-negative	TBM	Alive	60	15021.9	1732.21		688.609	1109.35	5.3391e+06	204248	12795.7	20.7762	74516.5	477013	572.854	1.84904	0.193464	0.458199	4.40964	0.0445741	0.00565392	2076.41	4171.82		2992.1	2594.72	101.712	1.9067e+06	10793.9	1.06548e+06	85.362	247335	95172.2	293194	15.6481	0.0382046	5.0015	0.0137936	34.2779	0.0483401
Female	22	HIV-negative	TBM	Alive	60	14993.7	837.824	448.629		1937.6	4.24751e+06	619917	156396	143.984	142175	290353	27292.3	0.595322	0.00854226	0.364341	14.375	0.845612	0.016286	5599.55	439.997		8701.67	2131.77	763.818	2.49699e+06	12242.3	924969		49808.4	86428.7	248799	2.48023	0.0537199	5.63037	0.0513669	29.8355	0.011958
Male	36	HIV-negative	Bacterial meningitis	Dead	1		867.989			1572.84	273865	49768.5	156892	168.143	18199.4	223005	7785.81	0.637606	0.00854226	0.0226785	0.706101	0.848377		4165.81	4573.8		309.249	2454.29	1760.4	3.64251e+06	64447.1	457708	263.102	182199	64340.6	238964	17.0665	0.0838294	28.297	0.107921	15.0627	0.0363429
Female	14	HIV-negative	TBM	Dead	8	7139.55	1091.96		852.405	1154.6	2.33656e+06	129932	7221.85	84.5545	136563	373864	854.127	0.951563	0.23745	0.200034	2.62795	0.013482	0.015404	2474.26	2900.72		84425	4160.25	620.052	1.7349e+06	3970.81	821355	279.473	254964	124648	343756	11.163	0.0336889	2.03902	0.0432084	26.5597	0.0497453
Female	31	HIV-positive	Cryptococcal meningitis	Follow-up < 60 days	42	571.217	509.029		183.852	1188.89	1.138e+06	38084.2	31747.3	147.366	1.39681e+06	198007		0.134429	0.0579146	0.0969785	0.42598	0.150291	0.213443	1846.42	5421.2		113343	2862.89	114.426	791832	21127.1	670535	294.674	956166	82584.7	181750	20.0566	0.00890097	9.48803	0.0145151	21.7914	0.178899
Male	21	HIV-negative	Non-infectious control	Dead	6		717.92			2717.85	313062	15094.1	171185	57.497	60300.4	240007	795.958	0.427244	0.00854226	0.0260488		0.928109	0.00341996	1733.28	2395.54		5961.12	7243.29		1.44668e+06	9629.9	410739	597.534	1.02657e+06	80618.8	24925.7	9.38042	0.0261133	4.49612	0.00802162	13.5778	0.191867
Female	40	HIV-negative	TBM	Alive	60	582.657	975.828	50.5109	237.336	1752.48	2.69176e+06	28007.8	4296.62	125.141	118078	2.78348e+06	776.078	0.788771	0.0722775	0.230575	0.184406		0.0124993	2505.79	2205.42		53388.1	4735.54	554.526	2.28306e+06	8554.05	292467	265.441	352961	433404	47783.8	8.70957	0.0480969	4.029	0.0394899	9.8385	0.0677952
Male	23	HIV-positive	Non-infectious control	Alive	60		574.637		149.31	1059.99	493572	17592.9	125332	163.794	190408	390670	611.143	0.226396	0.0486386	0.0415695		0.672329	0.0238655	2562.36	8061.18		30350.2	4817.99	384.354	2.5193e+06	20597.3	463450	129.797	284492	100823	1.63541e+06	29.3718	0.0543064	9.25802	0.029833	15.2442	0.055184
Female	33	HIV-negative	TBM	Alive	60	1345.43	1708.83	3288.72	5396.34	1703.11	576074	12306.5	176416		3799.76	772724	3446.7	1.81627	1.4577	0.0486632		0.957289		2809.05	2857.26		13101.5	4711.99	125.184	2.4448e+06	4366.98	362413		24410.7	112773	88086	11.0096	0.0523482	2.21103	0.0151256	12.0499	0.00728
Male	18	HIV-negative	TBM	Alive	60	6792.35	955.467		751.008	1338.35	5.41001e+06	244323	7100.5	273.473	76010	704111		0.760229	0.210221	0.464296	5.37039	0.0128051	0.00588861	5304.64	3041.96		74995.2	6655.31	702.204	1.35724e+07	17698.7	1.43156e+06	259.594	221302	206707	21156.5	11.6613	0.344831	7.99949	0.0478704	45.8518	0.0435452
Male	20	HIV-negative	Non-infectious control	Follow-up < 60 days	2		867.989			2306.47	146130	1722.33	82739.9	102.432	39656.4	658006	1096.38	0.637606	0.00854226	0.0116956		0.43474	0.000175889	1749.05	5643.91		21800.9	8341.34	177.018	1.87953e+06	8579.5	909398		498717	122921	344237	20.8424	0.0374905	4.04004	0.0180671	29.3433	0.0946418
Male	51	HIV-negative	Non-infectious control	Follow-up < 60 days	6		1085.93		793.349	3537.86	482251	21745.7	161384	160.412	398702	806417	996.973	0.943106	0.221591	0.040596	0.0342762	0.873438	0.0565975	2782.15	0		2006.66	4490.02	538.878	1.26838e+07	15795.1	502539	599.872	551547	268285	1.21495e+06	0.927683	0.321473	7.17296	0.0386019	16.4801	0.104372
Male	18	HIV-negative	TBM	Alive	60	7239.58	1080.65		798.921	1969.14	6.76603e+06	596435	55878.1	86.4871	234375	238090	652.377	0.935707	0.223087	0.580889	13.812	0.284899	0.0307745	2078.27	4177.26		4237.17	4962.04	853.794	3.60239e+06	8305.08	946505	534.389	278772	111790	525679	15.6673	0.0827748	3.9209	0.0564728	30.5164	0.0541305
Male	33	HIV-negative	TBM	Alive	60	28916.8	1233.74	8021.59	2443.56	1578.33	1.236e+06	319497	30094.2		1.65115e+06	201633	1848.15	1.1503	0.664745	0.105405	7.17263	0.141069	0.253411
Female	14	HIV-negative	TBM	Follow-up < 60 days	34	9172.99	1155.31	50.9701	539.299	1568.73	2.47323e+06	140765	9302.7	78.2733	185472	289798	804.794	1.04036	0.153368	0.211785	2.88767	0.0250895	0.0230899	3617.73	1765.42		16338.3	4267.15	1051.35	1.98482e+06	10022.4	453331	257.255	377991	90571.9	19582.8	7.15703	0.0402578	4.66655	0.0676838	14.9243	0.0724054
Male	59	HIV-negative	TBM	Alive	60	7213.78	1007.5		659.639	963.999	3.47788e+06	584496	50765.1	145.917	126931	204149	326.925	0.833169	0.185684	0.298167	13.5258	0.256377	0.0138905	6697.57	1607.89		3120.18	1843.66	3635.23	1.12341e+07	13833.3	645248	265.441	185762	108606	26116.8	6.60118	0.283368	6.32118	0.214314	20.9919	0.0369991
Female	39	HIV-negative	TBM	Alive	60	2804.2	906.449		188.309	1867.66	4.03824e+06	243219	8539.78	236.752	89338.5	498443	740.735	0.691518	0.0591115	0.346348	5.34393	0.0208337	0.0079831	1101.73	6040.45		14442.4	9482.87	58.68	2.15771e+06	9492.69	978561		135561	100960	477844	22.2416	0.0448024	4.43654	0.0113516	31.5299	0.0277527
Female	37	HIV-negative	Non-infectious control	Follow-up < 60 days	1		472.832			1954.05	17425.8	1286.77	61315.3	21.7426	568806	737397	911.56	0.0836884	0.00854226	0.000629367		0.315229	0.0833282	2414.91	4818.24		10125.6	4904.96	747.192	1.00841e+06	2914.05	551622		936739	275868	41234.9	17.929	0.0145937	1.58019	0.0504234	18.0319	0.17532
Female	32	HIV-positive	Cryptococcal meningitis	Follow-up < 60 days	18	1984.23	1236	2230.29	2742.18	1199.86	261499	53062.6	7824.38	128.523	488136	91780.2	555.919	1.15347	0.744938	0.0216153	0.785075	0.0168431	0.0706514	1204.67	3009.36		55371.7	5731.21	301.224	209357	9998.81	332413		159644	79000.6	39337.1	11.5463	-0.00640902	4.65629	0.0251155	11.1014	0.0321883
Female	16	HIV-negative	TBM	Alive	60	10505.7	1975.03		608.383	843.328	9.34265e+06	432041	76742.6		159746	312551		2.18942	0.17192	0.802433	9.87079	0.401286	0.0190471	5015.29	4693.3		8245.87	18301.7	1230.32	2.36204e+06	16163.1	894904	63.1445	192261	123314	252986	17.4882	0.0501729	7.33274	0.0778402	28.885	0.0381961
Female	20	HIV-negative	TBM	Alive	60	15251.3	1162.85		472.444	942.059	3.47209e+06	231187	13371.9		581558	399231		1.05093	0.135414	0.297669	5.05548	0.0477884	0.0853321	2746.91	2949.61		4802.59	4800.78	1046.46	2.49686e+06	6316.95	931067	126.289	282305	146314	275494	11.3355	0.0537165	3.05768	0.0674063	30.0283	0.0547812
Male	59	HIV-negative	TBM	Dead	3	108.018	740.543		410.046	1419.26	454076	51662.6	659634	105.331	419874	490959		0.458957	0.118658	0.0381735	0.75151	3.6528	0.0599245
Male	46	HIV-positive	Cryptococcal meningitis	Dead	0	871.325	750.347		439.016	1539.93	731139	48928.5	23380.6	165.727	546414	664062	1757.59	0.472699	0.126437	0.061996	0.685963	0.10362	0.0798094	2122.78	1053.82		17732.2	5967.67	326.652	3.32263e+06	9495.42	551355	235.038	789441	166168	112846	4.64612	0.0754215	4.43773	0.0265585	18.0234	0.14819
Female	17	HIV-negative	Non-infectious control	Dead	1		449.454			4442.9	712227	57226.5	180906	50.7327	1.17843e+06	240712	1717.09	0.0509184	0.00854226	0.0603699	0.884903	0.982336	0.179126	3338.58	6268.6		2896.32	3309.54	1213.7	2.91414e+06	30253.6	389309	217.498	753754	81996	69862.5	23.0466	0.0646846	13.4506	0.0768967	12.9002	0.141617
Male	14	HIV-negative	TBM	Alive	60	817.583	569.359			1538.56	1.05588e+06	110771	33463.2	148.816	211467	1.14337e+06	616.297	0.218996	0.00854226	0.0899175	2.16858	0.159863	0.0271748	1705.46	2938.75		6063.82	2417.15	91.932	792253	5596.39	761874	150.845	547913	103683	81659.7	11.2971	0.00891204	2.74482	0.0132386	24.6792	0.103703
Male	59	HIV-negative	Bacterial meningitis	Follow-up < 60 days	13		585.949		100.283	1904.69	719886	8505.89	119720	673.537	68054.2	736242	661.212	0.242253	0.0354726	0.0610284		0.641024	0.00463842
Male	33	HIV-negative	TBM	Alive	60	1464.09	860.448		499.186	1213.57	887096	105967	47158.5	102.915	569246	450199		0.627035	0.142596	0.0754055	2.05342	0.236258	0.0833973
Male	34	HIV-negative	TBM	Dead	3	9991.64	7008.77	1275.63	686.381	1304.07	9.79412e+06	456351	267817	218.392	282219	175821		9.24553	0.192866	0.841251	10.4536	1.46715	0.038293
Female	22	HIV-negative	TBM	Dead	2	2917.81	1206.59		436.788	791.22	2.79465e+06	543669	115561	238.202	344827	1.02605e+06	779.759	1.11224	0.125839	0.239421	12.547	0.617823	0.0481314	3506.44	2319.49		13821.6	1688.74	304.158	4.41374e+06	16023.2	1.04282e+06	391.73	368351	99063.6	1.05842e+06	9.11208	0.104101	7.27199	0.025282	33.5615	0.0706298
Female	24	HIV-negative	TBM	Dead	4	5456.49	1449.41		1383.9	840.585	2.26145e+06	169579	26229.5	63.295	140969	606356	605.252	1.45263	0.380181	0.193575	3.57847	0.119511	0.0160966	5210.04	4101.21		46453.1	5191.25	829.344	2.58508e+06	6915.75	851126	544.913	224249	157877	71261	15.3989	0.0560354	3.31767	0.0550853	27.5009	0.0440879
Male	59	HIV-negative	Bacterial meningitis	Dead	2	58.7978	552.768		240.679	1601.64	652757	103105	356423	138.186	1.479e+06	310302	6349.26	0.19574	0.0731751	0.0552566	1.9848	1.96141	0.226359	3072.42	7192.05		2019.35	8399.32	1321.28	2.6593e+07	38403.3	531732		62443.1	148374	1.12146e+06	26.3051	0.687068	16.9891	0.0830017	17.403	0.0142851
Female	20	HIV-negative	TBM	Alive	60	17806.7	1390.59	5237.06	4609.67	3835.43	2.32775e+06	90617.9	13971		72603.1	431079	669.312	1.37017	1.24644	0.199277	1.68544	0.0511305	0.00535325	1173.14	1352.58		23276.8	3280.54	144.744	1.5463e+06	8652.19	970199	396.407	699986	102872	78856.5	5.70032	0.0287316	4.07161	0.0162356	31.2655	0.131713
Male	36	HIV-negative	TBM	Alive	60	6414.55	787.298		172.709	851.555	1.32299e+06	301715	22827.3		75950	247324		0.524497	0.0549223	0.112884	6.74632	0.100533	0.00587918
Male	22	HIV-negative	TBM	Dead	5	89330.7		33120	3079.8	1016.11	594124	427779	223776	419.39	579060	4.64048e+06	2441.63		0.835604	0.0502152	9.76861	1.22147	0.0849395	2949.08	2324.92		4341.02	18108.7	2671.9	217719	14802.9	1.07491e+06	1411.4	2.0037e+06	328793	58590.6	9.13125	-0.00618924	6.74214	0.159647	34.5761	0.371843
Male	56	HIV-negative	Bacterial meningitis	Follow-up < 60 days	16	29636.5	1900.38	6159.58	6102.77	1756.59	825514	273616	813264		147640	689804		2.08477	1.6474	0.0701106	6.07268	4.50978	0.0171448	6016.87	2504.18		14636.2	3929.22	750.126	3.85607e+06	6949.37	1.0302e+06	205.804	1.49513e+06	111008	239514	9.76377	0.0894427	3.33227	0.0505899	33.1625	0.278169
Male	23	HIV-negative	TBM	Dead	4	103031	2049.69	8382.06	3405.16	1448.06	4.60934e+06	315325	24758.8	44.9347	5.11565e+06	238701	1435.08	2.29407	0.922978	0.395453	7.07263	0.111308	0.797834	2720.02	6203.42		60785.9	9351.5	1289.98	3.60961e+06	9988.82	1.19123e+06		2.62832e+06	115897	305178	22.8166	0.0829645	4.65195	0.0812257	38.2535	0.48689
Male	24	HIV-negative	TBM	Alive	60	2353.51	753.363			4322.23	681329	219070	26810.8		319872	401112	2660.31	0.476928	0.00854226	0.0577133	4.76498	0.122754	0.0442098	2900.86	4345.65		30710.3	6442.41	389.244	839627	11232.8	1.15219e+06	184.756	88033.4	101685	278761	16.2615	0.0101572	5.19206	0.0301105	37.0192	0.0189986
Female	23	HIV-negative	TBM	Alive	60	3095	1015.04			1926.63	1.09043e+07	539138	96411.3		967866	1.31439e+06	1918.84	0.843739	0.00854226	0.936709	12.4384	0.511003	0.146038	952.424	3156.03		15288.2	2679.88	172.128	2.00181e+06	7770.79	1.03501e+06	213.99	338224	228893	76990.2	12.0638	0.0407044	3.68892	0.0177896	33.3145	0.0650808
Male	29	HIV-negative	TBM	Alive	60	7791.38	1551.97		683.038	1043.53	1.47534e+06	497954	31017.5		115320	613083	278.328	1.59639	0.191968	0.125984	11.451	0.14622	0.0120659	6846.88	4079.48		2611.31	5376.07	905.628	4.23291e+06	15543.4	815655	185.925	1.68207e+06	137770	425664	15.3223	0.0993476	7.06368	0.0594143	26.3795	0.312601
Male	28	HIV-negative	TBM	Alive	60	11095.8	1440.36		875.804	2043.18	446213	271977	18586.7	314.543	53671.7	1.88221e+06	2318.66	1.43994	0.243734	0.0374975	6.03338	0.0768781	0.0023783	3796.71	3965.41		1737.79	11328.3	254.28	207378	10661.2	664125	881.684	39515.7	658066	18897	14.9197	-0.00646105	4.9439	0.0224515	21.5888	0.0100622
Male	63	HIV-negative	TBM	Dead	13	921.343	989.402	3814.49	2764.47	1449.43	165894	7592.46	184700		705008	622250	542.665	0.807798	0.750923	0.013395		1.0035	0.104731	2452.93	3644.91		4241.79	2601.97	622.986	1.02049e+06	6207.91	507978	154.353	607089	152223	23351.1	13.7889	0.0149112	3.01034	0.0433749	16.6521	0.114603
Female	47	HIV-negative	TBM	Alive	60	3217.65	818.217			2028.1	1.8858e+06	251969	53771		218021	215168	1777.47	0.567838	0.00854226	0.161277	5.5537	0.273145	0.0282047	1842.71	3264.67		16731.8	7706.25	291.444	4.37689e+06	5286.54	632991	425.64	62740.3	93488.5	245917	12.4472	0.103132	2.61029	0.0245605	20.6044	0.0143399
Male	48	HIV-negative	TBM	Dead	18	375.136	732.248	1322.47	1174.42	1556.39	240642	4574.64	386751	228.539	5.44173e+06	2.19257e+06	1926.2	0.447329	0.323927	0.019822		2.13059	0.849075	1754.61	2612.82		41261.7	4648.57	733.5	721506	3001.28	358544	589.348	3.61049e+06	539985	1426.6	10.1471	0.00705249	1.61806	0.0496464	11.9276	0.667794
Male	31	HIV-negative	TBM	Alive	60	6582.7		1377.57		1076.44	1.81946e+06	291432	847142		187119	179130	811.421		0.00854226	0.155572	6.49979	4.69876	0.0233486	2636.55	1010.36		3639.44	2293.94	327.63	2.83655e+06	4591.42	1.35771e+06	204.635	4.10779e+06	71615.5	300770	4.49278	0.0626452	2.30848	0.026614	43.5171	0.759392
Female	34	HIV-negative	TBM	Alive	60	3358.66	816.709		285.249	1657.86	1.93708e+06	212324	49158.7		203542	988593	1125.83	0.565724	0.0851442	0.165686	4.60324	0.247416	0.0259294	3316.33	2558.5		4695.28	5555.45	882.156	1.37669e+06	4983.05	859836	166.047	254526	165808	11547.7	9.95544	0.0242736	2.47852	0.0580823	27.7763	0.0496646
Female	26	HIV-negative	TBM	Alive	60	6854.87	951.696	669.04	367.704	1645.52	4.24826e+06	295620	292340		1.33028e+06	113737	876.953	0.754943	0.107287	0.364406	6.60022	1.60394	0.202989	5127.51	2487.88		5716.49	5616.16	264.06	2.24056e+06	8310.53	686641		317868	60377.4	26119.4	9.70627	0.04698	3.92327	0.0230065	22.3006	0.0613315
Female	23	HIV-negative	TBM	Alive	60	52948.4	953.204	9356.46	1617.9	1900.57	738476	124843	6902.77	44.4515	179283	3.11129e+06	1022.74	0.757058	0.443019	0.0626269	2.50596	0.0117021	0.0221173	1380.88	3128.87		22739	4134.88	1388.76	2.52051e+06	16515.7	1.6183e+06	463.059	896252	8.85246e+06	231226	11.968	0.0543381	7.48582	0.0868311	51.7558	0.167863
Female	26	HIV-positive	TBM	Dead	5		453.225		19791.4	8723.99	74696.5	21839	36525.1	50.7327	84724.7	140218	1049.25	0.0562039	5.3234	0.00555364	0.0365138	0.176943	0.00725807	1067.42	4041.45		32298.1	3754.37	145.722	322208	7189.26	178084		459965	61696.4	27425.1	15.1881	-0.00344282	3.43642	0.0162911	6.2222	0.0875042
Female	34	HIV-positive	TBM	Dead	16	1413.01	911.728	5927.23	2756.67	1427.49	565205	17088.9	134522	63.7782	526000	740268	1698.68	0.698917	0.748828	0.0477286		0.723592	0.0766015	1176.85	14194		4867.21	9582.52	316.872	3.16949e+06	32016.4	476220	533.22	226666	189429	226749	51.0116	0.0713961	14.216	0.0260035	15.648	0.0445331
Female	44	HIV-positive	Non-infectious control	Dead	2	6553.43	2258.58	14794.2	3446.39	1544.04	1.78961e+06	149589	35993.9	195.683	166858	611892	3428.29	2.58689	0.934049	0.153005	3.09923	0.173979	0.0201647	20114	8430.56		1365.08	40411.1	2207.35	1.86363e+07	91821.1	416646	933.135	84399.8	91557.6	208862	30.6752	0.477933	40.1824	0.133284	13.7645	0.0183293
Female	20	HIV-negative	TBM	Alive	60	6264.23	562.572		330.934	552.62	3.64463e+06	238973	8174.87	100.982	539843	523002		0.209483	0.0974125	0.312505	5.24213	0.0187982	0.0787768	4170.45	3769.85		10566.4	3931.04	262.104	1.79607e+06	5805.38	925507	438.503	568188	126904	264873	14.2297	0.0352967	2.83556	0.0228955	29.8525	0.107437
Male	42	HIV-positive	TBM	Dead	1	7132.36	1111.57		531.499	1442.57	854273	136328	21730.9		538706	287075	1570.56	0.979048	0.151273	0.0725833	2.78131	0.0944171	0.0785981
Male	17	HIV-negative	TBM	Alive	60	48.6878	333.32			1738.76	332178	27306	63012.6	46.3842	445503	319089	1065.45		0.00854226	0.0276924	0.167579	0.324696	0.0639519	1810.25	5046.39		3573.67	5087.97	84.108	4.16574e+06	17527	850906		140603	134537	404285	18.734	0.0975819	7.92493	0.0127946	27.494	0.0286813
Male	39	HIV-negative	TBM	Dead	1	22043.9	5330.1	458.272		1273.91	7.97482e+06	744851	457989	199.065	533983	510598	35162.8	6.89244	0.00854226	0.684824	17.3702	2.52797	0.077856	8107.19	8072.04		2.31588e+06	4557.97	1420.06	5.02788e+06	28866.1	1.04778e+06	1302.65	67317.9	159495	305013	29.4102	0.120243	12.8482	0.0886071	33.7184	0.015183
Female	21	HIV-negative	TBM	Alive	60	4146.98	711.133		143.739	611.584	1.00416e+06	503786	257381	31.4059	182963	431416	879.162	0.41773	0.0471425	0.085471	11.5908	1.40893	0.0226955	2415.84	999.5		6851.94	2808.53	795.114	3.05124e+06	4986.68	1.15136e+06	99.3941	169537	154559	446783	4.45445	0.0682881	2.4801	0.0531428	36.993	0.0340106
Male	45	HIV-negative	Non-infectious control	Dead	15	102.697	454.733			4430.56	791978	41693.2	147674	303.43	762690	162672		0.0583181	0.00854226	0.0672271	0.512502	0.796957	0.113796	5398.3	5920.95		6374.22	5015.49	4232.78	2.67102e+06	49120.8	731311	380.036	297989	94453.5	202561	21.8199	0.0582943	21.6425	0.248224	23.7129	0.05767
Male	22	HIV-negative	TBM	Follow-up < 60 days	31	754.794	672.673			1066.84	301769	76029.1	308877	166.693	2.00645e+06	840005	365.213	0.363818	0.00854226	0.0250778	1.33568	1.69619	0.309244	2715.38	2362.95		3307.12	6268.46	140.832	2.42405e+06	9906.13	1.11739e+06	843.096	948187	211345	58790.3	9.26542	0.0518027	4.61605	0.0160136	35.9191	0.177429
Female	29	HIV-negative	TBM	Alive	60	15429.2	1536.89		2957.23	1608.49	7.35138e+06	481430	15159.1	62.3287	2.81098e+06	1.76503e+06	1059.56	1.57525	0.802689	0.631219	11.0549	0.0577579	0.435671	5090.41	5035.52		2650.54	6366.3	1593.16	1.29093e+06	33592.9	1.00285e+06		926435	229054	21576	18.6957	0.0220195	14.9005	0.0984306	32.2979	0.173422
Female	26	HIV-negative	TBM	Alive	60	3589.06	1072.35		701.98	1832.01	3.95986e+06	178667	9006.53	171.042	679426	557590	1208.3	0.924079	0.197055	0.339608	3.79635	0.0234373	0.100711	2618.93	1868.63		137744	3219.84	366.75	1.44962e+06	2177.13	812306	143.829	238369	90049.5	20201.9	7.5212	0.0261905	1.26023	0.028834	26.2736	0.0466886
Female	28	HIV-negative	Non-infectious control	Follow-up < 60 days	1		987.14			3034.61	412772	6798.49	125024	155.097	20413.9	260114	643.541	0.804627	0.00854226	0.0346221		0.67061		1963.27	2949.61		91722.3	4437.48		1.6334e+06	17680.6	633940	374.189	337526	57419.6	36181.8	11.3355	0.0310209	7.9916	0.00802162	20.6344	0.0649522
Female	27	HIV-negative	TBM	Dead	3	1863.17	665.131			847.442	1.62248e+06	265865	110813	95.6673	447953	477713	4665.3	0.353248	0.00854226	0.138635	5.88686	0.591337	0.064337	1350.27	814.809		883.898	9121.38	95.844	6.4921e+06	7846.21	797373	284.15	387598	188457	507227	3.80277	0.158729	3.72166	0.0134606	25.8015	0.0741748
Male	36	HIV-negative	TBM	Dead	8	4583.3	758.642		188.309	1097.01	1.53402e+06	192619	16335.3	43.4851	131125	457891	5154.95	0.484327	0.0591115	0.131029	4.13083	0.0643191	0.0145495	10978.4	7148.59		6340.76	4610.52	1281.18	5.37437e+06	38171.6	514591	274.795	586264	81989.7	72005.4	26.1517	0.12935	16.8885	0.0807262	16.8611	0.110767
Female	26	HIV-negative	TBM	Dead	2	120117	1898.87	11361.3	3650.3	1527.59	6.39134e+06	577880	41887.6		333626	373924	1178.11	2.08265	0.988807	0.548673	13.3672	0.206856	0.0463713	906.982	3215.78		8055.47	4714.71	68.46	512688	3583.72	570431		2.70768e+06	173755	5598.7	12.2747	0.00156384	1.87095	0.0119066	18.6265	0.501507
Male	25	HIV-negative	TBM	Dead	3	7568.16	2372.45	110.206	1353.82	1415.15	9.25217e+06	1.00211e+06	58273.8	138.186	2.03926e+06	475614	1043.36	2.74651	0.372102	0.794653	23.5379	0.298263	0.314401	9323.92	1488.39		13201.9	5517.4	2601.48	1.58886e+07	12363.1	1.04465e+06	309.876	179665	99643.4	1.36112e+06	6.1795	0.40571	5.68284	0.155651	33.6193	0.035876
Male	53	HIV-negative	TBM	Alive	60	10504.6	1021.07	5216.86	4570.67	1305.44	172646	113175	108896	88.903	1.46367e+06	655995	589.79	0.852196	1.23597	0.0139755	2.22623	0.580648	0.22395	1754.61	3802.44		14302.8	13962.9	870.42	85106	7628.14	437521		1.04036e+06	50367.8	38699.6	14.3447	-0.00967489	3.62698	0.0574163	14.4245	0.194406
Male	26	HIV-positive	Cryptococcal meningitis	Follow-up < 60 days	2	382.851	444.175		91.3689	1242.37	389738	71972.2	26821	39.6198	348523	340500	645.75	0.0435188	0.0330788	0.0326416	1.23842	0.122811	0.0487122	2209.96	1510.11		26735	959.43	277.752	1.24323e+06	5729.05	843440	67.8218	583469	93010.9	202643	6.25617	0.0207656	2.80242	0.0237835	27.258	0.110252
Male	48	HIV-negative	TBM	Dead	2	3477.05	2425.24	155.665		740.483	9.05344e+06	407760	185594		336300	201682	2758.24	2.82051	0.00854226	0.777566	9.28868	1.00849	0.0467914
Male	34	HIV-negative	TBM	Alive	60	8822.07	637.983	30.7657	1081.94	2084.32	5.71444e+06	449396	38646.7	54.1149	754552	211015	1898.22	0.315192	0.299091	0.490471	10.2869	0.188777	0.112517	2544.74	2542.21		5528.4	33157	659.172	2.93302e+06	5686.35	747179	120.442	5.51141e+06	75051.7	35356.8	9.89794	0.0651806	2.78388	0.0454284	24.2146	1.01792
Male	42	HIV-negative	TBM	Dead	2	17608.5	907.957	456.894	870.233	6037.68	1.60516e+06	310257	129149	184.087	161606	329436	11137.5	0.693632	0.242238	0.137146	6.95111	0.693622	0.0193395	3632.56	1716.53		51860.4	7853.92	1078.73	4.94971e+06	8915.7	985924	453.705	154961	79946.8	194525	6.98452	0.118188	4.18602	0.0692378	31.7627	0.0313258
Female	22	HIV-negative	TBM	Alive	60	2990.71	1067.83		413.388	1450.8	4.70752e+06	274735	6423.29	38.1703	302464	312440	3685.27	0.917736	0.119555	0.403894	6.0995	0.00902743	0.0414744	2360.19	3253.81		186748	8490.82	288.51	1.94107e+06	10971.1	1.44207e+06	508.664	743337	56356	60460.4	12.4088	0.0391081	5.07843	0.024394	46.1842	0.139698
Male	46	HIV-negative	TBM	Follow-up < 60 days	30	29959.5	1238.26	7313.52	3235.8	1168.32	949604	148969	86188.7	47.3505	325647	1.18754e+06	8051.62	1.15664	0.877495	0.0807801	3.08437	0.453979	0.0451174	6611.32	4894.29		661691	4605.08	759.906	6.05807e+06	25830.3	493911	199.957	3.76739e+06	91154.4	27811.3	18.1973	0.147321	11.5301	0.0511449	16.2073	0.696693
Male	26	HIV-positive	TBM	Dead	1	1234.49	1118.36	2798.76	4138.34	1534.45	810571	29934.3	215093	78.2733	49077.4	417873	1664.08	0.988561	1.11987	0.0688258	0.230591	1.17304	0.00165634	3224.51	2482.45		28860.5	7781.44	627.876	2.82477e+06	8614.93	1.1033e+06	167.216	712939	91953.6	22234.5	9.6871	0.0623355	4.05543	0.0436524	35.4735	0.134099
Female	37	HIV-negative	Non-infectious control	Dead	2		616.114	703.479		1002.39	448997	16387.1	54098.6	142.535	1.1078e+06	219944	1388.69	0.284536	0.00854226	0.0377368		0.274972	0.168028	4318.83	10310.1		2693.24	3488.01	1567.73	1.80369e+06	36757.7	314220	104.071	420191	54012	14214.4	37.3071	0.035497	16.2746	0.0969876	10.5263	0.0801782
Male	40	HIV-negative	TBM	Dead	0	11983.6	2049.69			4290.69	8.75142e+06	754313	124264	66.1941	2.59763e+06	172430		2.29407	0.00854226	0.751597	17.597	0.666373	0.402144	3914.49	7463.65		4981.45	3952.78	923.232	1.98399e+06	21296.1	558181	177.74	132834	63515.3	184472	27.2634	0.0402361	9.56141	0.0604133	18.2393	0.0272503
Male	45	HIV-negative	TBM	Alive	60	43813.4	1122.88	8955.59	4038.06	1459.03	1.58879e+06	436129	36406.3		1.73005e+06	985148	3490.14	0.994904	1.09294	0.135739	9.9688	0.17628	0.26581	3850.5	2792.08		47152.4	3753.47	509.538	3.843e+06	6330.58	662688	79.5152	2.94727e+06	359585	265512	10.7796	0.089099	3.0636	0.0369369	21.5433	0.545636
Male	26	HIV-negative	TBM	Dead	1	39425.1	2313.63	6621.52	2388.96	1338.35	402952	1.08546e+06	26760.7	443.065	356893	92526	2194.96	2.66406	0.650083	0.0337778	25.5361	0.122475	0.0500274	2749.69	4628.12		1870.49	2215.12	336.432	305429	13079.1	1.06769e+06	553.099	138924	49184.2	122557	17.2581	-0.00388384	5.99373	0.0271135	34.3479	0.0283721
Male	37	HIV-negative	TBM	Alive	60	13735.3	537.686	163.472	640.696	1123.07	1.21674e+06	338500	212336	86.4871	1.99589e+06	1.26766e+07	764.297	0.174599	0.180597	0.103749	7.62821	1.15766	0.307585	3096.54	885.426		14100.8	3238.87	1521.77	1.28288e+06	8793.03	1.2756e+06	250.239	1.33756e+06	1.83729e+06	102001	4.05194	0.0218078	4.13276	0.0943791	40.921	0.249147
Female	27	HIV-negative	Non-infectious control	Follow-up < 60 days	16		665.886		249.593	1293.1	98921.5	4258.55	96604	500.562	119918	499769	923.341	0.354305	0.0755689	0.00763655		0.512077	0.0127884	459.983	5801.44		16292.1	5810.94	140.832	1.7373e+06	6510.49	423022	166.047	326320	57227.8	44159.9	21.3983	0.033752	3.14171	0.0160136	13.9661	0.0628881
Female	62	HIV-negative	Bacterial meningitis	Follow-up < 60 days	31	102.431	536.177		640.696	1267.05	486567	13509.9	418317	562.891	36685.3	367469	3027	0.172484	0.180597	0.0409672		2.30667		2371.32	814.809		27025.8	918.661	2382.41	5.26854e+06	4301.56	470364		62936.6	63951.7	429558	3.80277	0.126568	2.18262	0.143219	15.4628	0.014376
Female	28	HIV-negative	TBM	Alive	60	129.834	798.61			1752.48	476818	60254.3	99312.8	157.996	310203	452563	711.282	0.540353	0.00854226	0.0401289	0.957491	0.527188	0.0426905	1246.4	575.799		15607.8	3641.12	99.756	1.6416e+06	4494.19	1.01389e+06		230947	131677	208538	2.95941	0.0312367	2.26626	0.0136826	32.6468	0.0453217
Male	18	HIV-negative	TBM	Alive	60	14642	1389.08		571.613	777.507	4.93983e+06	271745	18220.1	134.321	204307	130736	1329.79	1.36806	0.162045	0.423868	6.02783	0.074833	0.0260496	4788.08	9582.16		3475.59	5330.77	592.668	1.40378e+06	13796.1	710773	433.826	144173	125284	60463.9	34.7386	0.0249856	6.30501	0.0416544	23.0636	0.0293389
Male	25	HIV-positive	TBM	Dead	22		686.247			1236.88	222635	11955.5	59949.9		204208	595129	505.85	0.382846	0.00854226	0.0182737		0.307612	0.026034	2370.39	4356.51		10332.1	4063.31	247.434	2.25446e+06	19463.3	1.32771e+06	155.522	312809	161298	116933	16.2998	0.0473452	8.76566	0.022063	42.5685	0.0603996
Female	40	HIV-negative	TBM	Dead	2	15009.4	616.114		924.831	1452.17	7.50062e+06	564511	9691.37	222.741	1.05891e+06	91770.5		0.284536	0.2569	0.644051	13.0467	0.0272576	0.160344	7025.86	9049.82		13916.2	4808.93	1461.13	2.03201e+07	33751	345539	746.04	1.05058e+06	101694	695061	32.8603	0.52219	14.9692	0.0909381	11.5164	0.196288
Male	27	HIV-negative	TBM	Follow-up < 60 days	37	3740.45	1113.83	3796.58	3030.77	1988.33	1.06205e+06	93431.6	91747.3	47.3505	2.90972e+06	304578	747.361	0.982219	0.822438	0.0904485	1.75289	0.484986	0.451187	3365.48	2878.99		43617.9	5135.08	322.74	1.33872e+06	4923.99	667265	406.931	1.13554e+06	118236	50377.8	11.0863	0.0232755	2.45287	0.0263365	21.688	0.211937
Male	25	HIV-negative	TBM	Alive	60	4626.94	1353.64		776.635	1406.92	2.04287e+06	324054	9337.49	142.535	94424.8	312663	2469.61	1.31837	0.217103	0.174782	7.28189	0.0252836	0.00878238	3195.77	2330.35		4472.57	5580.82	184.842	6.38677e+06	6727.66	1.10616e+06	316.892	199582	203984	570843	9.15042	0.15596	3.236	0.0185111	35.5639	0.0395446
Male	36	HIV-negative	TBM	Alive	60	96240.1	1331.02	13808.8	3311.56	1415.15	1.00245e+06	510362	21153.8	77.7901	259238	268016	1167.06	1.28666	0.897843	0.0853243	11.7485	0.091198	0.0346817	3446.16	5274.53		24958	16582.1	728.61	1.36157e+06	9211.92	1.30739e+06	245.562	1.45844e+06	204829	589492	19.539	0.0238763	4.31463	0.0493689	41.9262	0.271411
Female	34	HIV-positive	TBM	Dead	5	157.504	818.217		179.395	1693.51	2.11944e+06	16799	21117.3	205.83	376091	1.73964e+06	1161.17	0.567838	0.0567177	0.181365		0.0909945	0.0530443	4891.02	3166.89		2044.74	7722.55	88.02	2.22097e+06	6757.65	232773	252.578	418344	218036	6263.4	12.1022	0.046465	3.24902	0.0130166	7.95122	0.079838
Female	46	HIV-negative	Non-infectious control	Follow-up < 60 days	4		613.097		260.736	1387.72	658811	28724.6	144581	145.917	151920	367168	1267.94	0.280308	0.0785612	0.0557771	0.201591	0.779707	0.0178173	1636.83	2525.91		9772.5	652.304	588.756	3.56529e+06	15170	433777	329.754	1.01563e+06	85952.9	765453	9.84044	0.0817996	6.90153	0.0414324	14.3061	0.189851
Male	26	HIV-negative	TBM	Alive	60	2094.37	782.02		232.879	850.184	1.49104e+06	156435	20120.2		897911	859916	583.899	0.517097	0.0710806	0.127334	3.26335	0.0854322	0.135045	3116.94	4448.86		8566.66	4183.8	224.94	2.00906e+06	7330.1	936131	157.861	652566	220208	192305	16.6256	0.040895	3.49757	0.0207865	30.1884	0.122979
Male	14	HIV-negative	TBM	Alive	60	261.797	730.74		288.592	987.311	1.25994e+06	91337.2	15273.7		1.08232e+06	642148	1076.5	0.445215	0.0860419	0.107464	1.70268	0.058397	0.164023	5392.74	4367.38		1031.6	6822.92	1601.96	7.0126e+06	22018.5	277152	522.696	771393	114941	159739	16.3381	0.17241	9.87506	0.0989301	9.35431	0.144865
Female	47	HIV-negative	Non-infectious control	Follow-up < 60 days	12	797.363	782.774	3442.55	2517.1	1926.63	53722.1	1693.71	81665.5	71.9921	22918.5	221167	823.938	0.518154	0.684494	0.00375021		0.428747		1729.57	5155.03		10535.2	8683.8	337.41	944046	4344.27	731471	173.063	80501.1	117654	21892.1	19.1174	0.0129018	2.20117	0.027169	23.718	0.0176112
Male	56	HIV-negative	TBM	Dead	3	5396.63	820.48			1859.44	273089	164210	4098.89	59.4297	93749.1	2.19269e+06	1268.67	0.571009	0.00854226	0.0226118	3.44976		0.0086762
Female	28	HIV-positive	TBM	Alive	60	968.169	790.315			1697.63	760146	126898	9644.7	57.9802	988233	844253	3040.25	0.528725	0.00854226	0.0644901	2.55522	0.0269972	0.149238	2567	5377.74		10761.4	3785.17	456.726	1.85224e+06	11114.6	467355	252.578	522466	174321	115774	19.9032	0.0367733	5.14077	0.03394	15.3677	0.0990161
Male	32	HIV-negative	TBM	Dead	2	70470.7	1469.02	8602.93	5745.1	1306.82	5.60767e+06	1.34645e+06	139568	104.364	933917	373695	15789.6	1.48011	1.55135	0.481291	31.7932	0.751744	0.140703	16554.7	7659.21		3582.9	22960.2	5406.38	7.83922e+06	85464.2	628769	487.616	72255	140661	408851	27.9535	0.194137	37.4223	0.314824	20.471	0.0160924
Male	35	HIV-negative	TBM	Alive	60	17241.3	650.049	270.922	1665.81	1470	963441	438106	19161.3	167.659	633493	330130	5200.6	0.332106	0.455886	0.0819698	10.0162	0.0800829	0.0934933	3125.28	581.231		3680.99	7785.97	644.502	2.21837e+06	6628.62	514648	357.819	72148.6	193994	26544.1	2.97857	0.0463966	3.193	0.0445959	16.8629	0.0160728
Male	34	HIV-positive	TBM	Dead	4	10109.5	1217.15	1697.63		1642.78	1.30413e+07	672909	440189	215.493	172550	293935	2052.11	1.12704	0.00854226	1.12045	15.6454	2.42868	0.0210592	4200.12	7116		53988.2	5193.97	695.358	2.33989e+06	16425.7	1.2263e+06	304.029	318611	147359	849339	26.0367	0.0495908	7.44676	0.0474819	39.3624	0.0614683
Female	21	HIV-positive	Cryptococcal meningitis	Follow-up < 60 days		1197.24	925.302	1461.6	1835.18	1448.06	316980	30316.3	39229.7	99.5327	459052	926845	957.212	0.717945	0.501368	0.0263857	0.23975	0.19203	0.066081	918.11	423.701		6349.99	1831.89	234.72	1.46133e+06	15378.9	562502	914.425	712140	498473	112463	2.42273	0.0264982	6.99227	0.0213415	18.3759	0.133952
Female	35	HIV-positive	Non-infectious control	Dead	2	341.347	1478.07	967.054	1800.64	1272.53	968561	24194.8	60898.6	104.364	116232	95705.8	5488.5	1.4928	0.492092	0.0824101	0.0929915	0.312904	0.0122092	833.718	6284.9		628.883	3555.96	153.546	1.57577e+06	11421.8	146825	169.555	107912	74890.5	182670	23.1041	0.0295063	5.27412	0.0167351	5.23394	0.0226601
Male	29	HIV-negative	Bacterial meningitis	Follow-up < 60 days	8		1463.74		186.081	961.257	1.33872e+07	915895	316199	80.6891	205575	494014	19190.6	1.47271	0.058513	1.15019	21.4708	1.73703	0.0262489	2807.19	1874.06		7775.07	7559.48	977.022	5.82904e+06	28008.3	953511	292.335	50843.2	97264.4	81475.8	7.54037	0.141301	12.4758	0.0634658	30.7379	0.0121486
Male	39	HIV-positive	Non-infectious control	Dead	3	87.7977	806.151		525.928	914.634	1.60357e+06	60049	168867		143065	409084	8103.17	0.550924	0.149777	0.137009	0.952568	0.915181	0.0164259	6732.81	4867.13		393.485	3679.17	608.316	1.09518e+07	31142.2	540929	150.845	334263	95664.1	1.13126e+06	18.1015	0.275949	13.8365	0.0425424	17.6938	0.0643512
Male	38	HIV-positive	Cryptococcal meningitis	Follow-up < 60 days	4	722.335	610.835		303.077	1394.58	340926	67270.6	62915	188.919	544763	950873	1202.41	0.277137	0.0899318	0.0284446	1.1257	0.324152	0.0795499	4039.69	2270.6		29337.1	2517.71	155.502	3.6699e+06	7481.84	1.11248e+06		754173	181183	237553	8.93958	0.0845493	3.56346	0.0168461	35.7638	0.141694
Male	37	HIV-positive	Cryptococcal meningitis	Dead	1	88.0637	567.096			2691.79	35858.9	43379.4	308850	174.907	1.09964e+06	303296	1407.1	0.215825	0.00854226	0.00221429	0.552928	1.69604	0.166745	1023.83	3405.9		1103.14	5685.01	151.59	199977	7714.46	1.30238e+06		232013	22651.7	657055	12.9455	-0.00665558	3.66446	0.0166241	41.7676	0.045518
Male	34	HIV-positive	Cryptococcal meningitis	Dead	2	1587.01	917.761		213.937	2358.58	41248.1	36164	40932	236.752	478469	54518		0.707374	0.0659937	0.00267766	0.379945	0.201526	0.0691323
Female	20	HIV-negative	Non-infectious control	Alive	60	1010.21	1030.88	3506.38	2161.65	1683.91	124745	2283.59	178680	159.929	12523.1	329794	702.446	0.865938	0.589041	0.00985688		0.969919		1932.67	2699.74		14310.8	6163.37	623.964	1.72873e+06	18438.4	2.09934e+06	250.239	1.10063e+06	75891.3	26864.7	10.4538	0.0335267	8.32063	0.0434304	66.9642	0.205506
Male	21	HIV-negative	TBM	Alive	60	5735.58	1045.21			5357.53	2.85808e+06	251010	2163.16	117.41	583639	2.91737e+06	689.192	0.886023	0.00854226	0.244875	5.53072		0.0856591	2395.43	2151.1		132437	3065.83	466.506	665933	3799.08	555927	2355.05	2.34345e+06	9.33568e+06	47919.5	8.5179	0.00559178	1.96445	0.034495	18.168	0.43442
Male	21	HIV-negative	Non-infectious control	Follow-up < 60 days			712.641		478.015	1179.29	407416	6514.75	195431	230.954	67186.3	1.42698e+06	1510.92	0.419844	0.13691	0.0341616		1.06336	0.00450203	1664.65	2840.97		92165.4	2829.37	44.01	4.00323e+06	10229.6	939574	506.325	976090	104727	159796	10.9521	0.0933105	4.7565	0.0105191	30.2973	0.182568
Male	22	HIV-positive	Non-infectious control	Alive	60		391.387			1870.41	123994	2003.58	80664.1	259.945	93164	661500	804.794		0.00854226	0.0097923		0.423161	0.00858425
Female	33	HIV-negative	TBM	Alive	60	5486.56	2511.96		1695.9	2455.94	4.32581e+06	306355	27185.1	143.018	280110	146446		2.94207	0.463965	0.371074	6.85758	0.124842	0.0379616	2223.87	1363.45		28735.9	4368.62	143.766	1.98589e+06	7842.58	1.19172e+06	213.99	663150	2.00744e+06	240516	5.73865	0.0402859	3.72009	0.0161801	38.2691	0.124928
Male	49	HIV-negative	TBM	Alive	60	5525.13	739.035			5967.74	1.70968e+06	424491	12007.3		126372	125746	9980.04	0.456843	0.00854226	0.146133	9.68978	0.0401763	0.0138026	4102.75	1135.3		7591.6	4158.44	462.594	3.2834e+06	8171.51	682897	278.303	1.06857e+06	321458	3178.11	4.93363	0.0743902	3.8629	0.034273	22.1822	0.199602
Male	26	HIV-negative	TBM	Dead	7	8169.17	613.097	391.689		2650.65	161452	520920	63694	95.1842	907298	296571	920.396	0.280308	0.00854226	0.0130131	12.0016	0.328498	0.13652
Female	25	HIV-negative	TBM	Alive	60	151798	1794.8	13757.8	4493.79	1479.59	1.22116e+07	267457	5640.01	360.927	179229	760101	1480	1.93678	1.21532	1.04911	5.92502	0.00465806	0.0221088	2803.48	765.921		46891.6	4088.68	379.464	2.62669e+06	2424.28	512327	192.941	565735	1.21108e+06	22367.7	3.63026	0.0571292	1.36754	0.0295555	16.7896	0.106986
Female	30	HIV-negative	TBM	Alive	60	2562.1	1935.82			3424.05	478961	181486	58617.5	75.8574	1.0465e+06	1.12548e+06	818.784	2.13445	0.00854226	0.0403132	3.86393	0.30018	0.158394	1775.94	6317.49		53833.6	8564.21	87.042	703050	4797.68	764360	289.997	793785	642384	93959.7	23.2192	0.00656739	2.39803	0.0129611	24.7578	0.14899
Male	24	HIV-positive	Cryptococcal meningitis	Alive	60	1165.05	847.628		668.553	1205.34	456365	45579.6	9194.07	57.0139	318890	173628	808.476	0.609064	0.188078	0.0383703	0.605677	0.0244835	0.0440556	838.355	901.722		1963.96	4183.8	440.1	372798	17382.5	1.51288e+06	231.53	489962	63604.9	453475	4.10944	-0.00211309	7.8622	0.0329965	48.4227	0.0930292
Male	19	HIV-negative	TBM	Alive	60	8393.99	1188.49			1283.5	4.49055e+06	614057	11487.9		164204	126659	4068.89	1.08687	0.00854226	0.385238	14.2345	0.0372792	0.0197477	4480.19	1808.88		7059.65	7478.84	479.22	2.15019e+06	14618.4	1.23337e+06	164.877	92527.5	95245.6	480354	7.31036	0.0446045	6.66205	0.0352165	39.586	0.0198263
Male	36	HIV-negative	TBM	Alive	60	2021.74	859.694		1305.91	1424.74	1.5869e+06	160045	15992.5		150201	251348	1735.5	0.625978	0.359235	0.135576	3.3499	0.0624066	0.0175472	2655.1	2672.57		33934.3	14769.2	1464.07	1.80536e+06	10872	1.66339e+06	516.849	752687	3.98381e+06	1.83404e+06	10.358	0.035541	5.03543	0.0911046	53.1814	0.14142
Female	39	HIV-positive	TBM	Dead	2	5217.31	1145.5	4871.09	3278.14	1814.18	1.65555e+06	52756.4	112046		1.08402e+06	248732	955.739	1.02662	0.888866	0.141479	0.777735	0.598215	0.164291	2650.46	2308.63		1681.25	2037.54	743.28	3.8018e+06	22844.4	829606		633489	99368.3	294342	9.07375	0.0880162	10.2337	0.0502014	26.8206	0.119465
Male	27	HIV-negative	TBM	Alive	60	2041.96	1141.73			6602.64	691219	44886.5	5035.78		292386	1.32277e+06	766.506	1.02133	0.00854226	0.0585636	0.589058	0.00128754	0.0398906	3091.9	2292.33		81120.2	7398.21	317.85	622654	4911.27	928356	458.382	1.5724e+06	5.30789e+06	38953.6	9.01625	0.00445422	2.44735	0.026059	29.9426	0.292401
Female	47	HIV-negative	Non-infectious control	Follow-up < 60 days		859.087	1705.06	3205.61	4365.65	1930.74	592763	9633.37	91883	94.2178	71200.3	320566	957.948	1.81098	1.18091	0.0500981		0.485743	0.0051328
Male	34	HIV-negative	TBM	Dead	4	25679.2	1398.13	5405.13	3972.32	1435.71	2.40992e+06	204944	8850.38		76664.9	81329.3	8595.02	1.38074	1.07528	0.206341	4.42632	0.0225663	0.00599153	2007.79	6187.12		1597.02	8938.37	978.978	5.0383e+07	19645.1	309062	1123.74	257910	93085.3	4.15994e+06	22.7591	1.31237	8.84456	0.0635768	10.3632	0.0502879
Male	31	HIV-negative	TBM	Alive	60		980.352		432.331	2002.05	163039	2126.78	149850	79.7228	33621.3	621454	1111.1	0.795113	0.124642	0.0131495		0.809095		2958.36	3612.32		257870	4221.86	205.38	4.25578e+06	8403.22	1.53759e+06	772.935	797315	145068	492889	13.6739	0.0999487	3.96351	0.0196765	49.2039	0.14964
Female	37	HIV-negative	TBM	Alive	60	2101.02	760.904			2390.11	881331	44066.4	2777.57	64.7446	319942	365897	630.287	0.487499	0.00854226	0.0749098	0.569397		0.0442208	3479.55	12765.3		1764.33	4819.8	376.53	2.8701e+06	9712.59	1.17092e+06	105.241	1.50329e+06	2.11877e+06	462597	45.9706	0.0635269	4.53202	0.029389	37.6114	0.279672
Male	25	HIV-negative	TBM	Alive	60	595.96	604.048		362.133	818.645	287531	117217	58740.6		1.39572e+06	1.7502e+06	1004.34	0.267623	0.105791	0.0238536	2.32313	0.300866	0.213272	13858.8	4519.48		2619.38	4691.15	3609.8	4.65898e+06	94393.5	711320	152.014	929636	1.06255e+06	250414	16.8748	0.110546	41.2993	0.212871	23.0809	0.174012
Female	27	HIV-negative	TBM	Alive	60	134040	1407.94	10538	3747.24	1306.82	6.6777e+06	626616	10398.3		974926	235833	580.218	1.39449	1.01484	0.573294	14.5356	0.0312009	0.147147	3393.3	1890.36		34497.4	5756.58	307.092	3.79159e+06	3855.41	1.1351e+06	325.077	1.64083e+06	2.65959e+06	217920	7.59787	0.0877479	1.98891	0.0254485	36.4791	0.305006
Male	23	HIV-negative	TBM	Alive	60		812.184			1711.34	473994	19419.8	1.18679e+06	36.2376	33491.5	248128	1116.99	0.559381	0.00854226	0.0398861		6.5934		3117.87	3128.87		45331.5	3969.09	145.722	1.94077e+06	3916.29	953109	162.539	442659	99535.8	121893	11.968	0.0391001	2.01535	0.0162911	30.7252	0.0843165
Male	28	HIV-positive	TBM	Alive	60	2416.03	1073.11	1824.36	1016.2	1387.72	356533	22910.5	26836.3	127.073	316596	2.01586e+06	1895.28	0.925136	0.281437	0.0297866	0.0622018	0.122896	0.0436951	1767.59	2862.7		48091.7	3394.7	163.326	1.15845e+06	12583.9	959586	473.583	1.44639e+06	350059	149083	11.0288	0.0185372	5.77871	0.0172901	30.93	0.269192
Male	28	HIV-negative	TBM	Alive	60	2207.45	917.007			1415.15	1.25259e+06	364317	3796.78	50.2495	208202	485570	457.253	0.706317	0.00854226	0.106832	8.24717		0.0266617	4626.72	2927.88		17888	1198.61		5.9006e+06	7473.67	1.50494e+06	60.8058	202366	177303	1.28932e+06	11.2588	0.143182	3.55991	0.00802162	48.1717	0.0400574
Male	27	HIV-positive	TBM	Alive	60	23178.1	1584.4	3575.71	3065.31	1589.3	1.34834e+06	180335	162270	163.311	1.09707e+06	438217	10411.5	1.64185	0.831714	0.115064	3.83633	0.87838	0.166341
Female	51	HIV-negative	Non-infectious control	Alive	60	41.7704	946.417		486.929	1515.25	2.17438e+06	15971.4	208156	157.996	69476.7	1.4192e+06	993.291	0.747544	0.139304	0.186089		1.13434	0.00486195	3322.82	9457.22		4692.97	4513.58	8964.35	1.51238e+07	21546.9	910222	173.063	1.81569e+06	573630	626335	34.2978	0.385607	9.6703	0.516732	29.3693	0.337212
Female	30	HIV-negative	TBM	Alive	60	5953.75	886.842		523.7	1485.08	4.10607e+06	411503	18372	87.9366	246770	618378	5696.15	0.664033	0.149179	0.35218	9.37843	0.0756804	0.0327224	1412.41	6067.61		188142	6063.71	387.288	4.47683e+06	6923.93	1.06625e+06	1058.25	939761	2.14765e+06	308768	22.3375	0.105759	3.32122	0.0299995	34.3024	0.175877
Male	34		Cryptococcal meningitis	Alive	60	191.026	930.581	38.1128	109.197	1531.7	746568	35260.6	9355.31	53.1485	365335	2.37491e+06	2156.67	0.725345	0.0378664	0.0633227	0.358285	0.025383	0.0513541	1440.23	4215.28		2386.29	2691.66	84.108	2.08198e+06	4196.16	945053	149.676	162463	102879	234253	15.8014	0.0428116	2.13686	0.0127946	30.4705	0.0327076
Female	42	HIV-negative	Non-infectious control	Alive	60		723.198			1570.1	388441	2339.59	92967.6	75.8574	33660.5	2.58912e+06	1092.69	0.434644	0.00854226	0.0325301		0.491793		861.54	53614.5		7195.81	5199.41	42.054	1.4769e+06	4058.04	787349	301.69	441332	359663	47111.2	190.108	0.0269076	2.07689	0.0104081	25.4846	0.0840721
Male	55	HIV-negative	TBM	Dead	2	50692.5	5192.85	5171.86	7491.13	1374.01	4.61455e+06	429243	216363	165.727	790667	282807	1457.91	6.70004	2.02024	0.3959	9.80372	1.18012	0.118192	3248.63	7186.62		4394.1	1408.8	1166.75	7.24014e+06	45081	712135	363.665	453389	85702	242372	26.2859	0.178391	19.8885	0.0742327	23.1066	0.0862928
Male	33	HIV-negative	TBM	Dead	30	4784.18	1075.37		1487.53	980.454	951782	135580	60661	247.865	1.51556e+06	8.4285e+06	2902.56	0.928307	0.408009	0.0809674	2.76338	0.311579	0.232104	1491.23	3536.27		41182	12746.2	775.554	1.77712e+06	13550.7	1.0905e+06	1805.46	1.1074e+06	1.69133e+06	333727	13.4055	0.0347986	6.19849	0.0520329	35.0691	0.206754
Male	46	HIV-positive	TBM	Alive	60	354.649	1317.44		1468.59	1605.75	3.42885e+06	36557.3	258631	273.473	149823	3.46668e+06	2044.02	1.26763	0.402922	0.293951	0.389373	1.4159	0.0174878	1771.3	2053.32		6958.1	4466.47	132.03	2.50236e+06	6934.83	970114	128.628	2.04244e+06	368462	395369	8.17289	0.0538611	3.32596	0.0155141	31.2628	0.378978
Male	35	HIV-negative	TBM	Dead	6	7201.01	1214.13			2431.25	1.68665e+06	437333	18740.3	124.657	1.96187e+06	250102	3767.73	1.12281	0.00854226	0.144153	9.99768	0.0777349	0.302239	5747.93	1374.31		4364.1	69060.9	1541.33	1.99185e+06	10070.6	778050	475.922	988827	86553.2	625937	5.77699	0.0404427	4.68746	0.0954891	25.1906	0.184914
Female	41	HIV-negative	TBM	Alive	60	7104.43	1317.44		524.814	1024.33	2.38714e+06	250356	4458.71	111.129	110645	597217	1128.77	1.26763	0.149478	0.204383	5.51503		0.0113312	2311.97	1178.76		65904.6	2543.08	453.792	2.48039e+06	15135.4	966677	222.175	340616	155986	218980	5.08697	0.0532836	6.88654	0.0337735	31.1542	0.0655213
Female	55	HIV-negative	TBM	Dead	30		503.75			2861.83	127276	4124.14	50301.8	43.9683	109560	3.36864e+07	466.825	0.127029	0.00854226	0.0100745		0.253792	0.0111608	3.21979e+06	13895.2		19008.4	5723.97	156.48	8.26341e+06	14075.9	649015	133.305	209366	2.17623e+07	1.09357e+06	49.9574	0.205287	6.42652	0.0169016	21.111	0.0413466
Male	37	HIV-positive	Non-infectious control	Alive	60	19.688	757.134			2263.96	62823	2800.04	53933.9	76.3406	48163	446033	473.452	0.482213	0.00854226	0.00453272		0.274053	0.00151265	1333.58	1249.37		26153.5	9258.18	55.746	1.22301e+06	4436.04	953353	250.239	2.54719e+06	132798	217441	5.33614	0.0202343	2.24101	0.0111851	30.7329	0.471946
Male	22	HIV-negative	TBM	Follow-up < 60 days		2222.35	1110.81		709.78	1641.4	4.02814e+06	183412	28223.8	180.222	303307	283127	7939.7	0.97799	0.199149	0.345479	3.91011	0.130636	0.0416067	14199.2	4389.11		3670.6	2625.52	3415.18	3.25371e+06	79168.2	491885	864.144	742886	3.06783e+06	54105.9	16.4148	0.07361	34.6887	0.201826	16.1433	0.139615
Male	25	HIV-negative	TBM	Alive	60	5882.44	775.233	1072.67		984.568	3.85382e+06	556249	616519		870956	390380	1135.4	0.507583	0.00854226	0.330491	12.8486	3.41229	0.130809	1903.92	3031.09		39066.9	4146.66	932.034	1.3976e+06	12991.9	1.08083e+06	364.835	957092	8.46783e+06	152699	11.623	0.0248232	5.95585	0.0609128	34.7633	0.179069
Male	42	HIV-positive	TBM	Alive	60		1056.52		1202.28	5187.49	546566	34209	87551.6		620639	1.29604e+06	1318.74	0.90188	0.331407	0.046126	0.333074	0.461581	0.0914734	2331.44	3422.2		2715.16	6148.87	54.768	626153	4438.77	199093		683160	162213	25156.9	13.003	0.0045462	2.2422	0.0111296	6.8864	0.128614
Male	25	HIV-positive	TBM	Alive	60	2851.03	709.624		329.819	1240.99	2.10204e+06	281159	5981.16	57.0139	119005	413887	2113.97	0.415616	0.0971132	0.179869	6.25351	0.00656108	0.0126449	1928.03	3786.15		5947.27	2741.49	521.274	2.48445e+06	17097.2	1.23016e+06		2.98141e+06	5.12129e+06	291095	14.2872	0.0533903	7.73832	0.0376029	39.4845	0.551924
Female	54	HIV-negative	TBM	Alive	60	117.064	759.396		323.134	1917.03	638402	26840.5	87152.8	41.0693	549637	196332	1272.36	0.485384	0.0953179	0.0540223	0.156421	0.459356	0.080316	1958.64	6241.44		7539.67	2225.99	391.2	1.64671e+06	10993.8	642717	84.1926	304602	95635.4	597722	22.9508	0.031371	5.0883	0.0302215	20.9119	0.058888
Female	63	HIV-negative	TBM	Dead	7	1256.57	2195.24	3513.72	4551.73	2136.43	644845	23459.3	143940	273.473	46974.3	241720	1225.97	2.49809	1.23088	0.0545763	0.075359	0.776128	0.00132586	1564.5	6855.26		26817	10819.2	608.316	4.35648e+07	25105.2	383586	547.252	72699	98085.2	6.20689e+06	25.1167	1.13316	11.2153	0.0425424	12.7193	0.0161742
Male	23	HIV-negative	TBM	Dead	6	8633.97	506.013	168.523		7820.32	1.82975e+06	358965	41442.1	106.78	1.13056e+06	1.18051e+06	504.377	0.130201	0.00854226	0.156457	8.11885	0.204371	0.171604	5298.15	1504.68		17036.4	5946.84	1302.7	1.96649e+06	21028	742011	281.811	1.02384e+06	2.01794e+06	146854	6.237	0.0397761	9.44503	0.0819472	24.0512	0.191364
Female	49	HIV-negative	TBM	Dead	36	1863.29	1105.65		188.519	2398.03	1.96007e+06	341981	12003.4	151.424	90737	463123	15053.6	1.84206	0.0707099	0.0431442	4.92921	0.0915445	0.00124943
Female	61	HIV-negative	TBM	Alive	60	572.162	377.239		522.711	1291.03	116928	18074.9	241960	174.388	104967	1.95498e+06	245.941	0.275439	0.162747		0.0297478	1.17354	0.00364326
Male	56	HIV-negative	TBM	Alive	60	697.887	440.112		1583.84	805.623	1.26548e+06	160229	23204.6	330.835	826184	719553	401.755	0.410663	0.454986	0.0248657	2.18	0.144248	0.124972
Female	23	HIV-negative	TBM	Alive	60	2315.75	600.361			2131.42	952546	220015	9361.67	791.565	806771	728629	306.663	0.755321	0.0187913	0.0166306	3.08433	0.0791148	0.121706
Male	40	HIV-negative	TBM	Alive	60	185.2	292.13		205.657	808.521	104886	35265	1.70054e+06	61	33690.1	1.33675e+06	604.16	0.0923914	0.0754298		0.289768	8.03642
Female	49	HIV-negative	TBM	Alive	60	2358.66	802.015			2513.95	737805	215410	69627.3	179.412	1.71239e+06	383363	281.076	1.18903	0.0187913	0.0109795	3.01468	0.362676	0.274057
Male	59	HIV-negative	TBM	Alive	60	676.054	408.675			1770.63	282420	74643.7	37831.4	64.5882	699587	1.29328e+06	227.992	0.343051	0.0187913		0.885418	0.21307	0.103675
Male	18	HIV-negative	TBM	Alive	60	4243.78	1022.07		239.933	1156.27	1.71786e+06	349168	4365.56	330.118	1.11717e+06	1.57548e+06	343.706	1.66231	0.0848695	0.0367702	5.03793	0.0556071	0.173924
Female	61	HIV-negative	TBM	Alive	60	1284.35	510.652		298.488	1522.86	314901	60990.6	85867	307.153	418186	4.12564e+06	825.659	0.562379	0.100996		0.678898	0.439087	0.0563355
Female	38	HIV-negative	TBM	Alive	60	4407.9	527.521		434.165	1675	606308	105715	8620.25	361.694	143611	2.58235e+06	582.392	0.598658	0.138361	0.00751916	1.35541	0.0756263	0.0101443
Female	26	HIV-negative	TBM	Alive	60	2833.71	654.033		305.629	1576.47	997891	119258	14834	197.353	131802	1.01109e+07	773.34	0.870756	0.102962	0.0178238	1.56026	0.104863	0.00815764
Female	24	HIV-negative	TBM	Alive	60	7895.83	1045.84		884.039	885.316	2.6263e+06	144077	4193.95	208.835	70578.9	3.21322e+06	1320.6	1.71344	0.262258	0.0606763	1.93567	0.0547997
Male	23	HIV-negative	TBM	Alive	60	799.521	496.851		359.9	1260.6	384109	68087.3	84805.5	154.294	129012	829332	622.873	0.532695	0.117909	0.00167189	0.786245	0.434093	0.00768827
Female	52	HIV-negative	TBM	Alive	60	657.986	581.959			878.071	316623	62292.9	2123.97	113.388	30262.5	6.5001e+06	1283.55	0.715743	0.0187913		0.698598	0.04506
Male	53	HIV-negative	TBM	Alive	60	2214.11	345.035		237.077	1419.98	122684	106420	451872		27644.2	586421	467.059	0.206178	0.0840829		1.36608	2.16121
Male	36	HIV-negative	TBM	Alive	60	3740.13	816.583			2198.08	3.17195e+06	487902	51779.4	177.259	2.87841e+06	3.14008e+06	484.626	1.22036	0.0187913	0.0750353	7.13644	0.278698	0.470214
Female	33	HIV-negative	TBM	Alive	60	3526.32	742.209			1646.02	2.51564e+06	178286	26482.6	107.647	1.83783e+06	1.46802e+06	790.907	1.0604	0.0187913	0.0577641	2.45314	0.159672	0.295159
Male	51	HIV-negative	TBM	Alive	60	14140.7	1304.23		324.195	1299.72	864151	518456	13319.4	121.282	344483	237067	749.662	2.26917	0.108076	0.0143044	7.59861	0.0977367	0.0439366
Female	37	HIV-negative	TBM	Alive	60	1367.92	537.488		532.709	1619.94	492767	149702	11929.1	301.412	179921	656358	1100.24	0.620096	0.165501	0.00453126	2.02077	0.0911952	0.0162527
Male	29	HIV-negative	TBM	Alive	60	889.109	531.354			1073.68	1.37257e+06	198955	41854.6	91.1412	144130	756626	415.503	0.606904	0.0187913	0.0276838	2.76578	0.232001	0.0102316
Female	23	HIV-negative	TBM	Alive	60	1480.84	898.625		546.99	1333.04	3.20342e+06	203428	34711.4	100.471	544855	695776	287.186	1.39681	0.169434	0.0758634	2.83344	0.19839	0.0776447
Female	32	HIV-negative	TBM	Alive	60	3701.74	1025.14			2238.65	9.47952e+06	383410	14767.5	195.918	1.11431e+06	2.14864e+06	550.312	1.66891	0.0187913	0.241022	5.55589	0.10455	0.173442
Male	27	HIV-negative	TBM	Alive	60	677.56	495.317		238.505	1406.94	401264	97221.5	6250.43	274.859	274367	742684	1037.23	0.529397	0.0844762	0.00212333	1.22693	0.0644758	0.032141
Male	48	HIV-negative	TBM	Alive	60	5004.16	979.133			1441.72	1.55465e+06	897848	85556.6	109.8	207845	594831	3673.08	1.56997	0.0187913	0.0324753	13.3374	0.437627	0.0209503
Female	43	HIV-negative	TBM	Alive	60	19216.3	1127.12		718.371	922.989	2.35041e+06	592667	60077.6	83.9647	589717	1.67592e+06	4807.31	1.88824	0.216633	0.0534159	8.72114	0.317743	0.0851917
Male	38	HIV-negative	TBM	Alive	60	12662.8	754.477		1536.71	1311.31	1.43911e+06	315218	180913	232.518	839849	1.709e+06	2295.58	1.08679	0.442007	0.0294347	4.52439	0.886295	0.127271
Female	48	HIV-negative	TBM	Alive	60	2650.01	828.851			1557.63	3.22087e+06	199434	6190.65	63.1529	827698	1.30338e+06	637.766	1.24675	0.0187913	0.0763226	2.77301	0.0641945	0.125227
Female	34	HIV-negative	TBM	Alive	60	2982.02	555.89			1930.02	3.43234e+06	134062	1776.88	307.153	618346	1.71919e+06	812.293	0.659674	0.0187913	0.0818875	1.78419	0.0434269	0.090008
Female	65	HIV-negative	TBM	Alive	60	4064.61	709.239		327.052	1615.59	1.0397e+06	163517	16571.4	68.1765	663467	628732	3676.13	0.98949	0.108862	0.0189239	2.22974	0.113038	0.0975986
Female	20	HIV-negative	TBM	Alive	60	2153.13	469.248		378.466	2313.99	493600	661469	60979.1	264.812	688519	254249	298.261	0.473328	0.123022	0.00455317	9.76186	0.321985	0.101813
Male	32	HIV-negative	TBM	Alive	60	3057.3	939.263		484.151	1066.44	3.97577e+06	236328	304631	77.5059	588331	441540	568.261	1.48421	0.152128	0.0961882	3.33108	1.46842	0.0849586
Female	28	HIV-negative	TBM	Alive	60	2179.48	621.063		254.215	2274.87	3.13387e+06	189458	54492.4		1.48882e+06	1.29854e+07	818.403	0.799846	0.0888028	0.0740332	2.62212	0.291464	0.236445
Male	58	HIV-negative	TBM	Alive	60	6604.7	862.588		954.02	1903.94	934001	246598	104677	38.0353	28270.2	755202	1486.72	1.31931	0.281531	0.0161426	3.48643	0.527593
Female	44	HIV-negative	TBM	Alive	60	475.045	473.082			999.784	408762	96509.5	3571.12	599.235	88455.5	1.20981e+06	1403.09	0.481574	0.0187913	0.00232062	1.21617	0.0518691	0.000865617
Male	49	HIV-negative	TBM	Alive	60	39697.5	1024.37	205.462		1612.69	2.07785e+06	415692	17672.4	219.6	61397.4	147657	13814.7	1.66726	0.0187913	0.0462435	6.04419	0.118219
Male	84	HIV-negative	TBM	Alive	60	2113.23	466.948		432.736	1070.78	1.01895e+06	40166.4	11869.4	130.612	57851.4	2.52762e+06	800.072	0.468381	0.137968	0.0183781	0.363907	0.090914
Female	30	HIV-negative	TBM	Alive	60	9837.42	558.19		464.156	1076.58	2.82315e+06	148297	2504.8	146.4	52824.5	1.00538e+06	1466.86	0.664621	0.146621	0.0658564	1.99951	0.0468519
Male	39	HIV-negative	TBM	Alive	60	5504.8	670.902			1540.25	6.57239e+06	425334	26022.7	147.835	2.52803e+06	1.23667e+07	2181.77	0.907036	0.0187913	0.164519	6.19004	0.157508	0.41127
Male	25	HIV-negative	TBM	Alive	60	11879.1	1260.53		616.971	1719.92	2.90813e+06	635800	9839.87	414.8	171270	426185	2187.12	2.17518	0.188707	0.0680926	9.37358	0.0813648	0.0147973
Female	44	HIV-negative	TBM	Alive	60	586.466	306.698			5256.83	975069	27346.8	27217.3	27.9882	44789.2	396632	390.68	0.123724	0.0187913	0.0172233	0.169996	0.163129
Female	46	HIV-negative	TBM	Alive	60	2200.56	1112.55			5255.38	9.60274e+06	191488	20979.4	172.953	67373.5	794698	1354.59	1.8569	0.0187913	0.244265	2.65283	0.133778
Female	40	HIV-negative	TBM	Alive	60	5845.08	1684.54			749.113	1.01687e+07	232507	7488.37	124.871	35929.9	506754	791.671	3.08712	0.0187913	0.259157	3.27329	0.0703005
Male	24	HIV-negative	TBM	Alive	60	9126.73	700.038		375.609	1125.84	1.45922e+06	253951	4081.15	440.635	102212	546705	4818	0.969701	0.122235	0.029964	3.59766	0.0542689	0.00317978
Male	27	HIV-negative	TBM	Alive	60	2854.79	459.28		411.314	1377.96	528680	115889	16918.5	144.247	61079.1	963714	749.662	0.45189	0.132068	0.00547633	1.50931	0.114671
Female	31	HIV-negative	TBM	Alive	60	1694.65	733.775			1590.96	1.3847e+06	135783	29308.5	414.082	607589	1.08712e+06	876.833	1.04226	0.0187913	0.0280029	1.81022	0.172968	0.0881983
Male	49	HIV-negative	TBM	Dead	17		726.108			1598.21	69559.3	11048.4	320135		100279	831368	610.27	1.02577	0.0187913			1.54137	0.00285457
Male	39	HIV-negative	TBM	Alive	60	2351.89	487.65			1706.88	2.89206e+06	153701	14360.7	153.576	363048	296419	466.677	0.512906	0.0187913	0.0676699	2.08126	0.102636	0.0470597
Male	46	HIV-negative	TBM	Alive	60	2140.34	230.024		328.48	1089.62	715316	67487.5	11495.3	75.3529	206892	1.31904e+06	3871.28		0.109256	0.0103878	0.777172	0.0891538	0.0207899
Male	60	HIV-negative	TBM	Alive	60	2512.24	1149.35			1251.9	9.89933e+06	273907	8652.07	43.7765	191922	2.89038e+06	1433.64	1.93606	0.0187913	0.252069	3.89952	0.075776	0.0182715
Female	53	HIV-negative	TBM	Alive	60	23128.9	1680.71		1193.95	1301.17	2.50287e+06	469224	17725.5	79.6588	53060.3	215922	442.236	3.07887	0.347609	0.0574281	6.85392	0.118468
Male	36	HIV-negative	TBM	Dead	16	6996.18	535.955		435.593	1522.86	1.22898e+06	325374	61499.7	114.824	991920	1.84572e+06	753.099	0.616798	0.138755	0.0239051	4.67802	0.324434	0.152853
Male	55	HIV-negative	TBM	Dead	41	72.273	678.569			2903.72	332116	30671.6	656120	128.459	54998.3	210694	326.903	0.923527	0.0187913	0.00030366	0.220287	3.12224
Male	47	HIV-negative	TBM	Alive	60	9156.84	1393.18		308.485	1096.86	3.21411e+06	1.28166e+06	66485.2	81.0941	1.22913e+06	1.17345e+06	1702.11	2.46047	0.103749	0.0761447	19.143	0.347892	0.192758
Male	66	HIV-negative	TBM	Alive	60		713.073		579.838	1972.04	49333.2	4223.2	225115	78.9412	388120	1.44649e+06	168.034	0.997735	0.17848			1.09428	0.0512775
Male	33	HIV-negative	TBM	Alive	60	775.43	440.878			892.561	1.4547e+06	177356	2546.26	108.365	868482	206469	1187.7	0.412313	0.0187913	0.029845	2.43906	0.0470469	0.132088
Male	47	HIV-negative	TBM	Alive	60	661.75	452.38			3396.37	377641	132807	97499.2	66.0235	56081.3	682739	1693.33	0.437049	0.0187913	0.00150167	1.7652	0.493819
Male	25	HIV-negative	TBM	Alive	60	621.097	395.64			1682.24	188551	30501.4	104095	118.412	31556.1	1.17055e+06	711.472	0.315017	0.0187913		0.217712	0.524853
Male	37	HIV-negative	TBM	Alive	60	3367.47	1210.69			834.602	5.37208e+06	417193	4961.39	142.812	82508.6	1.42955e+07	2560.23	2.06799	0.0187913	0.132933	6.06689	0.0584106
Male	32	HIV-negative	TBM	Alive	60	3907.26	915.494			1199.74	2.68194e+06	589722	57067.6	58.1294	1.1819e+06	155639	505.249	1.43309	0.0187913	0.0621405	8.67659	0.303581	0.184813
Female	45	HIV-negative	TBM	Alive	60	1221.11	823.484		272.781	1056.29	2.63837e+06	188638	55333.1	212.424	105929	1.45e+06	3344.65	1.2352	0.093916	0.0609937	2.60972	0.29542	0.00380522
Male	40	HIV-negative	TBM	Alive	60	9246.43	620.297		956.876	1043.25	898024	193272	22057.3	95.4471	32016.1	266385		0.798197	0.282318	0.0151958	2.67981	0.13885
Male	34	HIV-negative	TBM	Alive	60	88.0828	516.786		382.75	1621.39	190092	44459.8	147429	242.565	66024.5	2.01319e+06	834.443	0.575571	0.124202		0.428851	0.72875
Male	53	HIV-negative	TBM	Follow-up < 60 days	56	8032.85	375.705		1219.66	1164.97	1.66704e+06	182418	48758.8		41305.2	1.91475e+06	512.123	0.272141	0.354689	0.0354328	2.51563	0.264486
Male	57	HIV-negative	TBM	Alive	60	667.773	388.74		362.756	1890.9	356373	134551	206319	149.988	88027.5	951523	348.289	0.300175	0.118695	0.000941982	1.79158	1.00584	0.000793621
Male	46	HIV-negative	TBM	Alive	60	3146.14	395.64			3003.7	260371	95386.8	63407.7	118.412	31975.3	663804	506.776	0.315017	0.0187913		1.19918	0.333412
Male	64	HIV-negative	TBM	Alive	60	33384.9	1187.69		844.05	1228.72	1.85868e+06	833592	118401	137.071	40515.3	1.00668e+06	357.837	2.01851	0.251245	0.0404759	12.3654	0.592168
Male	38	HIV-negative	TBM	Alive	60	22269.9	591.927		288.491	1185.25	1.75304e+06	169373	2239.67	190.176	98135.8	254189	532.363	0.737181	0.0982425	0.0376961	2.31831	0.0456044	0.0024941
Female	22	HIV-negative	TBM	Alive	60	6440.58	742.976			980.947	6.57979e+06	289896	4944.04	592.776	123766	557501	1791.47	1.06205	0.0187913	0.164714	4.14137	0.058329	0.00680587
Male	48	HIV-negative	TBM	Alive	60	7632.34	997.535		634.109	3223.94	841097	247459	138040	90.4235	65591.7	820947	349.053	1.60954	0.193427	0.0136977	3.49945	0.68457
Male	55	HIV-negative	TBM	Alive	60	5532.65	1008.27			1004.13	5.67216e+06	564266	6020	160.035	359901	261336	1156	1.63263	0.0187913	0.140829	8.29155	0.0633916	0.0465303
Male	44	HIV-negative	TBM	Alive	60	3690.44	2533.33		1011.15	991.09	1.1779e+07	512138	3163.3	122.718	261958	1.4197e+06	424.287	4.91265	0.297264	0.301534	7.50305	0.0499502	0.0300536
Male	44	HIV-negative	TBM	Alive	60	15854.9	1988.17		448.446	1796.71	1.38726e+06	268087	12554.9	113.388	26951.3	1.82069e+06	770.284	3.74015	0.142295	0.0280702	3.81148	0.0941393
Male	28	HIV-negative	TBM	Alive	60	18831.6	974.533		362.756	1353.33	725014	319349	142716	96.1647	23641.1	233107		1.56007	0.118695	0.010643	4.58688	0.706572
Female	39	HIV-negative	TBM	Dead	56	2153.89	642.532			1073.68	751381	150336	69209.8	40.1882	1.10992e+06	4.69598e+06		0.84602	0.0187913	0.0113368	2.03035	0.360712	0.172705
Male	27	HIV-negative	TBM	Alive	60	23562.5	795.881		796.921	1235.96	1.65639e+06	386673	8635.68	722.671	29382.3	917666	5104.04	1.17584	0.238266	0.0351525	5.60524	0.0756989
Male	67	HIV-negative	TBM	Alive	60	5068.15	996.002		458.444	1495.33	1.73443e+06	254368	19283.5	167.929	73755.1	565488	2157.71	1.60624	0.145048	0.0372063	3.60396	0.125799
Female	48	HIV-negative	TBM	Alive	60	1835.43	312.065			2848.66	1.31376e+06	97607.9	2107.58	65.3059	34824.6	518401	672.137	0.135267	0.0187913	0.026136	1.23278	0.0449829
Male	38	HIV-negative	TBM	Alive	60	4142.9	596.528			1903.94	6.09926e+06	138085	1586.95	209.553	69897.6	401837	916.933	0.747075	0.0187913	0.152069	1.84504	0.0425332
Male	35	HIV-negative	TBM	Alive	60	8855.71	812.75		964.017	1017.17	1.02936e+06	342038	66130.4	77.5059	558242	384351		1.21212	0.284284	0.0186519	4.93007	0.346223	0.0798968
Male	24	HIV-negative	TBM	Alive	60	6691.28	721.507		425.596	1238.86	306522	187030	123302	48.8	1.14367e+06	277033	1126.21	1.01588	0.136002		2.5854	0.615227	0.178382
Female	55	HIV-negative	TBM	Dead	50	10416.4	656.334		671.241	1311.31	1.48784e+06	289950	85145.8	78.2235	60821	1.08107e+06	1257.97	0.875703	0.203653	0.0307171	4.14219	0.435694
Male	45	HIV-negative	TBM	Alive	60	10602.3	1636.23		752.647	1647.47	1.50846e+06	374633	44979.4	149.988	415687	9.34352e+06	289.859	2.98323	0.226072	0.0312597	5.42312	0.246703	0.0559151
Male	47	HIV-negative	TBM	Alive	60	7219.02	941.563			1057.74	6.84966e+06	823729	10056.8	628.659	236765	200614	3610.45	1.48916	0.0187913	0.171816	12.2162	0.0823855	0.0258155
Male	25	HIV-negative	TBM	Alive	60	1623.89	731.475			1079.48	884949	389898	74329.3	48.8	1.11334e+06	1.46914e+06	499.52	1.03731	0.0187913	0.0148517	5.65402	0.3848	0.17328
Female	45	HIV-negative	TBM	Alive	60	10176.2	877.923		187.091	1333.04	1.09993e+06	46140.5	2230.99	139.224	32524.6	1.13293e+07	2252.81	1.35229	0.0703166	0.0205092	0.454273	0.0455635
Male	50	HIV-negative	TBM	Alive	60	8853.45	1053.51		375.609	925.887	1.2278e+06	230079	15414.5	338.012	154719	608394	1291.95	1.72993	0.122235	0.023874	3.23657	0.107594	0.0120129
Male	46	HIV-negative	TBM	Alive	60	4667.63	441.645		872.614	1517.06	652696	199396	39859.9		31208.7	651420	6315.8	0.413962	0.259112	0.00873988	2.77244	0.222615
Male	25	HIV-negative	TBM	Alive	60	17146.8	834.219		535.565	2082.16	2.082e+06	413727	28499.6	148.553	61286.8	4.52861e+06	285.658	1.25829	0.166287	0.0463527	6.01446	0.169162
Male	45	HIV-positive	Cryptococcal meningitis	Dead	1	150.569	483.049			2570.46	158542	17806.1	91166.8	120.565	468854	959093	1078.47	0.503012	0.0187913		0.0256811	0.464024	0.0648593
Male	52	HIV-negative	Non-infectious control	Dead	10		878.69		237.077	1053.4	134145	6700.92	124612	47.3647	10395.5	538925	965.815	1.35394	0.0840829			0.621392
Female	36	HIV-positive	Cryptococcal meningitis	Dead	1	1771.44	683.17		275.637	1393.9	366831	60170.5	36847	98.3176	723306	366750	487.299	0.933421	0.0947026	0.00121721	0.666494	0.208439	0.107665
Male	46	HIV-positive	Cryptococcal meningitis	Dead	36	11626.2	713.073		1092.55	5790.05	1.52713e+06	175402	10443.4	259.788	3.1348e+06	544078	637.003	0.997735	0.319683	0.031751	2.40951	0.0842046	0.513346
Male	45	HIV-positive	Cryptococcal meningitis	Dead	5	2942.87	775.179		304.201	717.236	787184	137424	68229.3	216.012	751348	2.65932e+06	489.209	1.13131	0.102569	0.012279	1.83505	0.356098	0.112383
Male	39	HIV-positive	Cryptococcal meningitis	Dead	24	1414.59	558.19			1419.98	562935	59509.9	2549.15		86142	1.39318e+06	1681.87	0.664621	0.0187913	0.00637776	0.656501	0.0470606	0.000476413
Male	44	HIV-negative	Bacterial meningitis	Alive	60	7185.9	411.742			1254.8	501575	171191	11289.9	141.376	20103.8	522910	1773.91	0.349648	0.0187913	0.00476306	2.34581	0.0881876
Male	36	HIV-negative	Non-infectious control	Alive	60	896.638	640.999			1528.65	4.24908e+06	238407	93987.8	1059.96	87016.3	614885	2607.2	0.842722	0.0187913	0.10338	3.36253	0.477298	0.000623507
Male	32	HIV-positive	Cryptococcal meningitis	Dead	1	2458.04	698.505		252.787	1443.17	262869	17815.5	21934.8	114.106	766530	394535	474.697	0.966403	0.0884094		0.0258242	0.138274	0.114937
Male	50	HIV-negative	Non-infectious control	Alive	60		716.14		904.033	1135.99	75029.9	5231.04	122181	155.012	10900.1	632529	593.467	1.00433	0.267765			0.609951
Male	26	HIV-negative	Non-infectious control	Alive	60		374.172			1776.43	24934.2	2280.48	114526	217.447	78803.4	546005	607.979	0.268843	0.0187913			0.573932
Male	53	HIV-negative	Bacterial meningitis	Alive	60	118.949	571.225			2241.54	398925	23222.2	42250.9	185.153	65138.5	265383	648.46	0.692656	0.0187913	0.00206176	0.107607	0.233865
Male	29	HIV-negative	Bacterial meningitis	Alive	60	5242.05	459.28		291.347	1488.08	273986	227018	155643	56.6941	62842.4	722954	1772.76	0.45189	0.0990292		3.19026	0.767396
Female	47	HIV-negative	Bacterial meningitis	Dead	7	6611.48	441.645			1421.43	602631	144289	13768.7	130.612	93451.4	2.97228e+06	1201.45	0.413962	0.0187913	0.00742238	1.93888	0.0998507	0.00170606
Male	28	HIV-negative	Non-infectious control	Alive	60		647.133			3977.4	35801.7	3974.62	156777	65.3059	336309	1.10366e+06	809.238	0.855914	0.0187913			0.772731	0.0425615
Male	25	HIV-positive	Cryptococcal meningitis	Alive	60	222.842	684.703		334.192	523.075	142224	24615.1	43682.6	175.106	696886	1.10608e+06	592.321	0.936719	0.110829		0.128675	0.240602	0.10322
Male	37	HIV-positive	Cryptococcal meningitis	Dead	3	1666.04	699.271		149.958	824.459	241646	74734.2	15604.4	165.059	711136	476659	507.158	0.968052	0.0600902		0.886788	0.108488	0.105618
Female	27	HIV-positive	Non-infectious control	Alive	60	141.535	279.095		392.748	567.993	704227	31509.2	2334.15	356.671	39103.3	781816	2273.05	0.0643571	0.126955	0.0100959	0.232957	0.0460489
Male	23	HIV-positive	Cryptococcal meningitis	Alive	60	1320.49	569.692		281.35	1657.61	323258	100099	978004	55.2588	132151	444863	3669.64	0.689358	0.0962759	7.05516e-05	1.27046	4.63677	0.00821641
Male	61	HIV-negative	Bacterial meningitis	Alive	60	19524.3	861.821			6778.24	1.15768e+06	842948	84446.9	71.7647	65355.9	385540	3796.05	1.31766	0.0187913	0.0220288	12.5069	0.432405
Female	55	HIV-negative	Bacterial meningitis	Alive	60	10716	1397.01		624.112	1231.62	2.63427e+06	499465	119168	315.047	11422.2	514781	3164.01	2.46871	0.190673	0.0608859	7.31135	0.595775
Male	21	HIV-positive	Cryptococcal meningitis	Alive	60	4809.17	466.181		427.024	921.54	921911	230242	2626.28	183	335614	2.91932e+06	837.498	0.466732	0.136395	0.0158244	3.23902	0.0474235	0.0424445
Male	24	HIV-positive	Non-infectious control	Alive	60		522.153		305.629	738.971	117300	11107.9	23492.9	58.8471	731466	636158	356.309	0.587115	0.102962			0.145605	0.109038
Male	26	HIV-negative	Non-infectious control	Dead	4		386.439		315.626	1280.88	893416	23578.9	175764	159.318	89019.3	389015	1318.31	0.295228	0.105716	0.0150745	0.113002	0.862071	0.000960469
Male	36	HIV-negative	Non-infectious control	Alive	60		326.633			1872.06	50842.2	3047.84	148722	90.4235	14328.7	1.13529e+06	276.875	0.1666	0.0187913			0.734834
Male	39	HIV-negative	Non-infectious control	Alive	60		431.677			5805.99	31869.4	3769.27	189801	98.3176	19588.5	3.5243e+06	443.763	0.392524	0.0187913			0.928116
Male	45	HIV-negative	TBM	Alive	60	3838.62	802.381			1851.21	1.43023e+06	240828	35875.9	42.0356	326232	123762		0.545639	0.00854226	0.122106	5.28661	0.173321	0.0452094
Female	23	HIV-negative	TBM	Alive	60	5824.98	884.58			1788.13	3.12378e+06	299127	4452.77	150.265	189702	576909	4906.08	0.660862	0.00854226	0.267721	6.68429		0.0237545
Male	27	HIV-positive	TBM	Alive	60	243.971	317.483			1290.36	48443	20496.3	23286.5		443868	146425	1009.49		0.00854226	0.00329629	0.00432184	0.103094	0.0636951
Female	30	HIV-negative	TBM	Dead	1	86375.6	3245.72	13048.3	4078.17	1188.89	8.04815e+06	695904	188993	98.0832	401516	176106	535.302	3.97063	1.10371	0.691129	16.1967	1.02745	0.0570397
Male	49	HIV-negative	TBM	Dead	26	1631.97	1257.11	3474.23	4016.89	1661.97	250807	30275.2	329760	59.9129	340762	882982	1016.85	1.18307	1.08725	0.020696	0.238765	1.81268	0.0474926
Male	40	HIV-negative	TBM	Dead	4	9553.19	1297.84	174.492	169.367	1278.02	2.1596e+06	570575	42291.6		99046	4.43414e+06	1212.71	1.24015	0.0540247	0.184818	13.1921	0.209109	0.00950857
Female	30	HIV-negative	TBM	Alive	60	9475.76	881.563		790.007	1298.59	3.8732e+06	583502	26014	52.1822	1.68158e+06	690014	662.685	0.656634	0.220694	0.332157	13.502	0.118309	0.258193
Male	25	HIV-negative	TBM	Alive	60	756.922	571.621		396.675	1080.56	2.43331e+06	178917	65410	242.55	2.6794e+06	197518	807.003	0.222168	0.115067	0.208353	3.80235	0.33807	0.414994
Female	49	HIV-negative	TBM	Dead	5	5081.89	420.043			2029.47	306168	299975	27413.3	140.119	647107	6.70822e+06		0.00969174	0.00854226	0.025456	6.70461	0.126115	0.0956326
Male	30	HIV-negative	Bacterial meningitis	Alive	60	212.045	449.454	39.4904		3872.45	272207	255841	38551.6	86.4871	81182	1.38436e+06		0.0509184	0.00854226	0.022536	5.64654	0.188247	0.00670136
Male	23	HIV-negative	TBM	Dead	3	103194	2209.56	21189.3	4200.74	1759.33	6.55604e+06	658465	39749.1	89.3861	629753	408166		2.51818	1.13663	0.562834	15.2992	0.194927	0.0929056
Female	55	HIV-negative	TBM	Alive	60	1493.36	1618.34	3886.13	7584.73	1443.94	2.51647e+06	22461.3	140337	259.945	705728	1.42634e+06		1.68942	2.04538	0.215503	0.0514313	0.756028	0.104844
Female	43	HIV-negative	TBM	Alive	60	463.465	953.958	1557.57	1261.34	1251.96	132179	5794.21	133257	48.8	452442	1.87914e+06	833.51	0.758115	0.347266	0.0104961		0.716538	0.0650424
Female	25	HIV-negative	TBM	Dead	2	5507.57	1236	109.746		5922.49	1.22373e+07	1.16366e+06	103797	214.527	594560	736343	946.903	1.15347	0.00854226	1.05132	27.4108	0.552202	0.0873752
Male	18	HIV-negative	TBM	Alive	60	7759.98	834.808		457.959	844.699	1.90037e+06	349182	39323.9	43.9683	1.10161e+06	821187	2971.04	0.591094	0.131524	0.162529	7.88432	0.192555	0.167054
Male	27	HIV-positive	TBM	Alive	60	47500.1	1602.5	7743.32	2969.49	2379.14	987010	144539	11192.6	118.859	890008	535830		1.66722	0.80598	0.0839963	2.97816	0.0356318	0.133803
Female	19	HIV-negative	TBM	Alive	60	7298.12	855.923			5113.45	4.50221e+06	166842	3127.21	287.002	97348.1	1.35302e+07	8642.89	0.620692	0.00854226	0.386241	3.51286		0.00924176
Male	35	HIV-negative	Bacterial meningitis	Alive	60		471.323		213.937	1153.23	409604	24092.8	210389	87.4535	28026.9	844113	535.302	0.0815742	0.0659937	0.0343497	0.0905451	1.1468
Male	25	HIV-negative	TBM	Dead	1	45081.2	1278.98	10928.3	2933.83	2006.16	252012	144746	31974.7	76.3406	233022	803604	485.969	1.21372	0.796405	0.0207996	2.98311	0.15156	0.030562
Female	26	HIV-negative	TBM	Alive	60	5495.6	610.835		532.614	1319.16	3.65462e+06	202977	17334.1	134.804	239981	235073		0.277137	0.151572	0.313364	4.37915	0.0698909	0.0316556
Male	24	HIV-negative	TBM	Alive	60	2080.54	855.169			4765.15	549928	149109	12833	85.0376	1.09121e+06	727965		0.619635	0.00854226	0.0464151	3.08771	0.0447824	0.165421
Male	30	HIV-positive	TBM	Dead	10	210.714	551.26		197.223	1081.93	451849	18319.7	23468.9	160.895	571355	1.76282e+06	837.192	0.193626	0.0615053	0.0379821		0.104112	0.0837287
Female	21	HIV-negative	TBM	Alive	60	40132.1	600.277	14590.3	2901.52	1011.99	3.26965e+06	271047	171912	86.9703	1.61074e+06	3.09665e+06	6771.17	0.262337	0.787727	0.280263	6.0111	0.932162	0.247061
Female	50	HIV-negative	TBM	Alive	60	3744.17		645.162	825.663	338.702	62629.3	203458	336192		902417	151685			0.230269	0.00451607	4.3907	1.84856	0.135753
Male	33	HIV-positive	TBM	Alive	60		987.894			7062.01	270670	11013.5	186685	34.7881	659048	523246	791.54	0.805684	0.00854226	0.0224038		1.01457	0.0975091
Female	31	HIV-negative	TBM	Alive	60	26939	1355.9	3507.29	2240.77	942.059	2.81911e+06	356100	32468.6	85.0376	393291	506891		1.32155	0.610286	0.241524	8.05017	0.154315	0.0557472
Female	21	HIV-positive	TBM	Dead	7	4575.59	1772.93		198.337	1830.64	2.82497e+06	424679	23983.2	86.4871	2.22948e+06	90873.6	745.889	1.90612	0.0618045	0.242028	9.69429	0.106981	0.344292
Female	26	HIV-negative	TBM	Alive	60	7667.13	1404.92		716.466	2076.09	5.89078e+06	172582	89744.5	83.5881	598356	947584		1.39026	0.200945	0.505633	3.65046	0.473814	0.0879718
Female	31	HIV-negative	Bacterial meningitis	Alive	60	3798.71	968.287		541.528	1803.21	812716	1.28812e+06	80317	14.495	255878	990665		0.7782	0.153966	0.0690102	30.3947	0.421225	0.0341537
Male	37	HIV-negative	TBM	Dead	6	4028.58	863.464		1006.17	873.496	2.37017e+06	262604	66441.1	27.5406	578826	516948	667.103	0.631263	0.278744	0.202924	5.80867	0.343821	0.0849027
Male	23	HIV-negative	TBM	Alive	60	6101.67	831.037		474.672	1164.2	837346	455796	218573	101.465	509193	8.66705e+06	641.332	0.585808	0.136013	0.0711279	10.4403	1.19245	0.0739603
Female	47	HIV-negative	Bacterial meningitis	Alive	60	587.712	2419.96		417.845	1737.39	1.15687e+07	1.46327e+06	106524		124682	614991	2803.16	2.81311	0.120752	0.993831	34.5937	0.567416	0.0135371
Male	40	HIV-negative	TBM	Alive	60	826.628	616.114	55.562		1722.31	4.08909e+06	76495.8	138999	279.271	610178	1.15148e+06	2183.92	0.284536	0.00854226	0.35072	1.34687	0.748568	0.0898295
Female	33	HIV-negative	TBM	Alive	60	6503.68	1668.11	100.103		1062.73	5.10093e+06	409597	184018		401677	111602		1.75918	0.00854226	0.43772	9.33272	0.999695	0.0570649
Female	29	HIV-negative	Bacterial meningitis	Dead	4	2330.36	1351.38		1996.74	1531.7	4.81517e+06	81511	3.89946e+06		139523	1.50707e+06	951.321	1.3152	0.544756	0.41315	1.4671	21.7253	0.0158692
Male	38	HIV-positive	TBM	Dead	25	907.243	965.27			4702.07	41675.8	24156.2	17179.7	69.5762	614307	1.4896e+06	494.069	0.773971	0.00854226	0.00271444	0.0920666	0.0690293	0.0904783
Male	33	HIV-negative	TBM	Dead	8	7700.39	1318.95		1324.85	948.915	3.03592e+06	746641	23395.1	47.3505	75083.3	555341		1.26975	0.364322	0.260166	17.4131	0.1037	0.00574299
Female	18	HIV-negative	TBM	Alive	60	8917.05	1309.9			3603.68	7.31601e+06	319395	5901.38	76.8238	273763	904865		1.25706	0.00854226	0.628178	7.17019	0.0061161	0.0369641
Male	34	HIV-positive	TBM	Dead	3	8924.5	884.58	2403.86	1167.74	1474.11	497033	77595.9	92341.3	165.244	1.40263e+06	571495	1248.79	0.660862	0.322131	0.0418671	1.37324	0.488299	0.214358
Male	19	HIV-negative	TBM	Alive	60	3851.92	711.887	129.492		1367.15	3.3106e+06	236952	279352	79.7228	2.89375e+06	752979	7101.77	0.418787	0.00854226	0.283783	5.19368	1.53149	0.448678
Male	21	HIV-negative	TBM	Dead	3	7896.74		207.554		1014.74	8.24698e+06	687510	231303	42.5188	538476	4.68708e+06	5126.97		0.00854226	0.708224	15.9955	1.26346	0.0785619
Female	20	HIV-negative	TBM	Dead	18	7754.4	1129.67		1096.43	1400.06	6.83505e+06	592828	10797.1	85.5208	361626	373349	2549.86	1.00442	0.302981	0.586824	13.7255	0.0334258	0.0507713
Female	27	HIV-negative	TBM	Alive	60	6501.02	723.198		776.635	1427.49	1.89711e+06	356965	25130.5	145.917	4.79501e+06	4.30347e+06	651.64	0.434644	0.217103	0.162249	8.07091	0.113381	0.747448
Male	32	HIV-positive	TBM	Alive	60	2568.22	671.919			2557.41	1.09557e+06	51856.7	32332	57.497	414964	403589	455.044	0.362761	0.00854226	0.0933304	0.756164	0.153553	0.0591529
Male	26	HIV-negative	TBM	Alive	60		718.674		247.365	913.262	492739	5030.11	716254	456.594	372398	1.18121e+06	487.442	0.428301	0.0749705	0.0414979		3.96864	0.0524639
Male	33	HIV-positive	TBM	Dead	60	4197.53	929.073		326.477	778.878	186800	468632	23600.4	271.541	201615	153600		0.723231	0.0962156	0.0151925	10.748	0.104846	0.0256266
Female	25	HIV-negative	TBM	Alive	60	18211.9	1759.36		1998.97	3321.2	2.25255e+06	301333	27765.5	175.39	237021	439025	539.72	1.88709	0.545354	0.19281	6.73716	0.12808	0.0311904
Male	44	HIV-negative	TBM	Alive	60	49611.8	2085.89	12508.8	3476.47	1958.17	1.68759e+06	329479	82436.1	75.3743	371330	340615		2.34481	0.942128	0.144234	7.41194	0.433045	0.0522962
Male	40	HIV-negative	TBM	Dead	2	8930.09	1437.35	168.064	666.324	1448.06	4.92572e+06	664375	123978		895301	384679	863.699	1.43571	0.18748	0.422655	15.4408	0.664778	0.134635
Female	16	HIV-negative	TBM	Alive	60	5707.38	1186.98		402.246	909.149	104330	244015	15025	289.901	167136	2.77285e+06		1.08476	0.116563	0.0081016	5.36302	0.05701	0.0202084
Male	52	HIV-negative	TBM	Dead	5		2148.48			1117.58	1.75535e+06	671158	207387		51440	466923	3683.06	2.43255	0.00854226	0.15006	15.6034	1.13005	0.00202761
Male	26	HIV-negative	TBM	Alive	60	8383.88	1065.57		495.843	2436.74	6.97904e+06	426858	18619	747.945	125048	479546	1849.63	0.914565	0.141698	0.599204	9.74653	0.077058	0.0135946
Female	20	HIV-negative	TBM	Alive	60	1299.67	901.17		470.215	1316.41	1.91912e+06	106165	31627.6	213.56	137579	3.69906e+06	1572.04	0.684118	0.134816	0.164141	2.05816	0.149624	0.0155637
Male	31	HIV-negative	TBM	Alive	60	7355.32	1272.95		1124.28	811.789	5.69858e+06	271956	39925.6	142.535	445261	664327	4460.61	1.20527	0.310462	0.489107	6.03288	0.195911	0.063914
Male	24	HIV-positive	TBM	Dead	27	83.2748	586.703			1457.65	166738	11568.5	33123.8	25.6079	230858	274119		0.24331	0.00854226	0.0134676		0.157969	0.0302219
Male	28	HIV-positive	TBM	Dead	2		874.776			2822.06	199993	4557.22	152327	84.0713	56958.5	542892	583.163	0.64712	0.00854226	0.0163269		0.822913	0.0028948
Male	28	HIV-negative	TBM	Alive	60	13960.6	1112.32		792.235	980.454	1.13752e+07	660215	25398.7	139.152	192625	287004	16204.1	0.980105	0.221292	0.977196	15.3411	0.114877	0.0242139
Female	36	HIV-negative	TBM	Alive	60	4188.22	1556.5		385.532	4401.76	1.84232e+06	457454	29766.6	271.541	313560	217812		1.60273	0.112075	0.157538	10.4801	0.139242	0.043218
Male	30	HIV-positive	TBM	Alive	60	7604.88	1186.98		433.445	1334.24	1.42684e+06	333801	74919.7	13.5287	1.93827e+06	3.1678e+06	2590.36	1.08476	0.124941	0.121814	7.51556	0.391117	0.29853
Female	44	HIV-negative	TBM	Alive	60	2331.96	904.941		1615.67	1258.82	1.73009e+06	149847	240200	167.176	140397	954355	743.68	0.689404	0.44242	0.147888	3.1054	1.31309	0.0160065
Female	34	HIV-positive	TBM	Dead	7	755.592	969.041	44.0823	218.394	1461.77	705012	261181	276051	97.1168	519249	3.16081e+06		0.779257	0.0671906	0.0597496	5.77456	1.51308	0.0755406
Male	27	HIV-negative	TBM	Alive	60	47640.9	1188.49	7344.29	3213.51	1729.16	392569	244632	78063.9		457471	688768	2541.77	1.08687	0.871511	0.032885	5.37782	0.408656	0.0658326
Female	50	HIV-negative	TBM	Dead	10	16247.4	2431.27	289.29	1651.33	1203.97	3.70511e+06	318245	32842.9		530346	569721		2.82896	0.451996	0.317705	7.14262	0.156402	0.0772844
Male	53	HIV-negative	TBM	Dead	6	1394.65	1990.87	768.225	1452.99	2384.63	911626	32033.7	886937		354680	246771	5571.71	2.21162	0.398733	0.0775147	0.280922	4.92075	0.0496798
Female	20	HIV-negative	TBM	Alive	60	23813.9	2236.71	1571.35	1845.21	1630.43	2.34946e+06	153981	9827.15		510844	432888	4966.46	2.55623	0.504061	0.201143	3.20452	0.028015	0.0742198
Female	29	HIV-negative	TBM	Alive	60	1362.99	643.262			2203.62	323485	134318	22463.3	336.285	620680	1.33292e+06	3789.82	0.322592	0.00854226	0.026945	2.73312	0.0985024	0.0914798
Male	21	HIV-negative	TBM	Alive	60	1585.68	690.771			1734.65	1.41526e+06	55223	4578.37	163.794	148024	913682		0.389189	0.00854226	0.120818	0.836868		0.0172052
Male	30	HIV-negative	TBM	Alive	60	4183.69	677.951		474.672	1231.4	90159.2	162044	4270.31	275.889	497435	1.30557e+06		0.371218	0.136013	0.00688315	3.39782		0.0721127
Female	22	HIV-negative	TBM	Alive	60	40870.4	889.104	4284.7	1762.75	2025.36	3.70554e+06	89805.3	5897.99	95.1842	103176	1.10993e+06	1882.03	0.667205	0.481918	0.317742	1.66595	0.00609716	0.0101576
Male	38	HIV-negative	TBM	Dead	4	9166.61	779.757		1211.19	1087.41	579506	288390	21738.5		56326.8	525844	1973.33	0.513926	0.333801	0.0489582	6.42688	0.0944597	0.00279554
Male	20	HIV-negative	TBM	Alive	60	6002.17	998.451		1352.71	1075.07	217701	265409	6138.15	410.693	190410	131824		0.820483	0.371803	0.0178495	5.87591	0.00743685	0.0238659
Male	28	HIV-negative	TBM	Alive	60	3109.63	954.713		186.081	1438.46	1.45472e+06	162807	9163.52	106.78	158027	248620	616.297	0.759172	0.058513	0.124211	3.41611	0.0243131	0.018777
Male	35	HIV-negative	TBM	Alive	60	20819.5	7150.54	11552.3	5011.92	940.688	2.23741e+07	653250	665513	139.152	2.63108e+06	592386	31004.8	9.44426	1.35446	1.9229	15.1741	3.68559	0.4074
Female	64	HIV-negative	TBM	Dead	7		1093.47		459.073	2296.87	535886	7156.9	222714	133.838	53975.2	342908	2879	0.953677	0.131823	0.0452077		1.21555	0.002426
Female	57	HIV-negative	TBM	Alive	60	44953.5	1968.25	13461.2	4644.21	1193	4.71725e+06	378136	28046.4	159.446	131813	111969	15509	2.17991	1.25572	0.404731	8.57846	0.129647	0.0146577
Female	22	HIV-negative	TBM	Dead	22	7135.29	1099.5		330.934	1645.52	1.99011e+06	358966	261376	32.8554	35291	449701	714.964	0.962134	0.0974125	0.170245	8.11888	1.43122
Female	26	HIV-negative	TBM	Alive	60	3542.24	741.297		893.632	1147.75	1.01721e+06	222638	13913.3	236.269	227355	428694	4132.21	0.460014	0.248522	0.0865929	4.85051	0.0508086	0.0296715
Male	31	HIV-negative	TBM	Alive	60	11421.4	1489.38		1351.59	1284.88	9.70728e+06	384280	47838.2	99.5327	1.82086e+06	555748		1.50865	0.371504	0.833784	8.72576	0.24005	0.28008
Female	20	HIV-negative	TBM	Alive	60	38299.7	1929.03	6361.16	4793.52	1442.57	2.05344e+06	179073	14850.2	73.4416	1.96446e+06	1.49872e+06	1008.02	2.12494	1.29581	0.175691	3.80608	0.0560348	0.302646
Male	29	HIV-negative	TBM	Dead	7	34.853	736.018		245.136	1094.27	1.04457e+06	15421.4	447521	87.4535	95795.9	1.59046e+06	2194.22	0.452614	0.074372	0.0889456		2.46958	0.00899784
Male	20	HIV-negative	TBM	Alive	60	1005.42	920.023		368.818	1556.39	3.03274e+06	135713	63198.4		447327	1.89854e+06		0.710546	0.107586	0.259893	2.76657	0.325733	0.0642385
Female	16	HIV-negative	TBM	Alive	60	6814.16	833.3	133.165		1604.38	2.66051e+06	310381	17135.6	50.7327	265813	370315	918.187	0.58898	0.00854226	0.227888	6.95409	0.0687831	0.0357149
Male	21	HIV-negative	TBM	Dead	34	86.9995	698.313			8702.05	141607	13819.7	1.07346e+06	66.6772	927339	1.83739e+06		0.39976	0.00854226	0.0113068		5.9612	0.139669
Female	30	HIV-negative	TBM	Alive	60	5760.86	1278.23		771.064	2364.06	2.31492e+06	148437	12592.8		479328	751733	19913.7	1.21267	0.215607	0.198173	3.0716	0.0434427	0.0692674
Female	18	HIV-negative	TBM	Alive	60	53.7428	624.409			1188.89	1.77704e+06	722360	309132		399355	243903	20558	0.296164	0.00854226	0.151925	16.831	1.69761	0.0567
Male	19	HIV-negative	TBM	Alive	60	7663.14	530.144		826.777	765.166	1.71545e+06	513692	33702.6	162.345	548815	460230	745.889	0.164028	0.230568	0.146629	11.8283	0.161198	0.0801867
Male	20	HIV-negative	TBM	Alive	60		614.606			2180.31	674544	33148.7	62661.3	244	690650	3.41799e+06	1736.97	0.282422	0.00854226	0.0571299	0.307655	0.322737	0.102475
Female	50	HIV-negative	TBM	Dead	5	99.504	492.439		547.099	1301.33	672440	18904.6	46614.5	478.82	708038	1.17875e+06		0.111173	0.155462	0.056949		0.233224	0.105207
Female	47	HIV-negative	TBM	Dead	2	4716.33	1826.47		834.577	3359.6	2.02833e+07	353271	27720.5	61.8455	451807	536341		1.98117	0.232663	1.74313	7.98236	0.127829	0.0649426
Male	19	HIV-negative	TBM	Dead	9	45804.3	1983.33	11430.6	3790.69	1101.13	3.92429e+06	272553	19706.9	47.3505	1.17187e+06	861840		2.20105	1.02651	0.33655	6.0472	0.0831268	0.178095
Male	30	HIV-negative	TBM	Dead	7	18550.3	1196.78	4608.89	4174	1489.19	4.71259e+06	40314.3	273226	350.297	2.02722e+06	1.45787e+06	832.774	1.0985	1.12944	0.40433	0.479445	1.49732	0.312508
Male	27	HIV-negative	TBM	Alive	60	3076.11	2188.45		707.552	1038.05	190248	74184.8	9149.95		203000	112461	982.246	2.48858	0.198551	0.015489	1.29146	0.0242374	0.0258442
Male	26	HIV-negative	TBM	Alive	60	6166.86	857.431	1461.14	251.822	791.22	1.31333e+07	471406	379001	152.198	1.66601e+06	261697	636.178	0.622807	0.0761674	1.12836	10.8145	2.08736	0.255747
Female	49	HIV-negative	TBM	Alive	60	6829.06	2166.58	29.8474	513.671	1570.1	4.00803e+06	401716	29477.2	58.9465	322221	283788	3311.22	2.45792	0.146486	0.343751	9.14377	0.137628	0.044579
Female	30	HIV-negative	TBM	Alive	60	7212.45	866.481		338.733	1833.38	3.78386e+06	489641	20259.4	115.96	1.73918e+06	7.76414e+06	625.869	0.635492	0.099507	0.324475	11.2517	0.0862085	0.267244
Female	24	HIV-negative	TBM	Alive	60		579.162			1726.42	381665	13005.9	78630		1.62518e+06	4.47627e+06	658.267	0.232739	0.00854226	0.0319475		0.411814	0.249331
Male	44	HIV-negative	TBM	Alive	60	6143.44	976.582		190.538	2631.46	5.20931e+06	708739	28066.8	45.901	255455	202241		0.789828	0.05971	0.447039	16.5044	0.12976	0.0340871
Female	39	HIV-negative	TBM	Alive	60	3375.69	536.177			3585.86	60958.8	178830	10176.8		653327	268489	3577.03	0.172484	0.00854226	0.00437243	3.80026	0.0299654	0.09661
Male	21	HIV-negative	TBM	Alive	60		699.067			1834.75	197458	5471.9	89042.7		337141	290606	1158.96	0.400817	0.00854226	0.016109		0.469899	0.0469236
Female	23	HIV-negative	TBM	Dead	5	113.871	1037.67	325.107		1101.13	5.3952e+06	519067	57910.6	83.105	895970	147468		0.875452	0.00854226	0.463022	11.9572	0.296236	0.13474
Male	29	HIV-positive	TBM	Dead	1	1073.53	426.076	1945.13	3466.45	482.685	40707.5	32375.9	159594	376.388	1.43335e+06	572903		0.0181485	0.939435	0.00263118	0.289127	0.863449	0.219186
Male	28	HIV-negative	TBM	Dead	5	4555.1	1970.51	319.596	1134.31	4378.45	4.4451e+06	176043	22728.1	80.2059	643693	265718	611.879	2.18308	0.313155	0.381331	3.73343	0.0999794	0.0950961
Male	14	HIV-negative	TBM	Alive	60	1810.23	2732.17	971.187		1352.07	8.67952e+06	386145	1.22785e+06	78.7564	186345	1.11803e+06	1138.35	3.25074	0.00854226	0.745415	8.77048	6.82244	0.023227
Male	18	HIV-negative	TBM	Alive	60	3799.51	861.202		206.137	1416.52	108797	296105	8286.04	214.044	361608	2.04418e+06	1128.77	0.628092	0.0638991	0.00848568	6.61182	0.0194183	0.0507684
Male	30	HIV-negative	TBM	Alive	60	4000.65	1844.57		230.651	1284.88	2.9026e+06	527696	32201.3	231.921	113620	1.98786e+06	901.988	2.00654	0.0704821	0.248703	12.1641	0.152824	0.0117987
Female	23	HIV-negative	TBM	Alive	60	8804.51	1064.06	82.195	899.203	1434.34	2.57223e+06	395318	7271.08	93.7347	992965	1.65764e+06	767.242	0.912451	0.250018	0.220297	8.99039	0.0137566	0.149982
Female	18	HIV-negative	TBM	Alive	60	5780.81	591.228		902.546	1445.31	442337	215592	8215.6	135.77	313069	309061	1710.46	0.249652	0.250916	0.0371642	4.68159	0.0190254	0.0431408
Female	14	HIV-negative	TBM	Follow-up < 60 days	34	9396.48	1096.49	2393.76	1395.05	1343.84	1.89221e+06	119838	16075.6		495461	2.35948e+06	673.73	0.957906	0.383174	0.161828	2.38596	0.0628705	0.0718026
Male	30	HIV-negative	TBM	Alive	60	112.807	520.341			1960.91	956752	82303.7	140671	53.6317	658964	1.95435e+06	4198.48	0.150285	0.00854226	0.0813947	1.48611	0.757893	0.0974959
Female	25	HIV-negative	TBM	Alive	60	3611.68	1076.13		568.27	1251.96	3.3599e+06	136768	8073.88	137.22	194329	704728	516.894	0.929364	0.161148	0.288022	2.79184	0.0182348	0.0244816
Male	23	HIV-negative	TBM	Alive	60	427.282	843.103			2407.94	664274	54756.3	6392.74		298112	329418	581.69	0.602722	0.00854226	0.0562468	0.82568	0.00885701	0.0407905
Female	18	HIV-negative	TBM	Alive	60	2708.43	953.958	373.322		1228.65	2.47179e+06	182732	168995	94.701	1.31981e+06	339340	722.327	0.758115	0.00854226	0.211661	3.89379	0.915891	0.201343
Female	55	HIV-negative	TBM	Alive	60		591.228		193.88	991.424	359537	8981.28	120779		41978.6	1.58251e+06	1206.82	0.249652	0.0606076	0.0300449		0.646931	0.000540809
Male	28	HIV-negative	TBM	Dead	15	17706.7	2914.66	5834.93	2338.82	1282.13	4.14961e+06	269743	25420.8		328097	2.88205e+06	2470.34	3.50656	0.636618	0.355923	5.97983	0.115	0.0455023
Male	37	HIV-negative	TBM	Alive	60	1786.55	1141.73			2794.64	5.51727e+06	663635	99884.8		279464	5.172e+06	2112.49	1.02133	0.00854226	0.473518	15.4231	0.530379	0.03786
Male	43	HIV-negative	TBM	Alive	60	500.713	474.34		153.767	1386.35	1.15952e+06	151093	19465.1	86.004	144823	219702	2165.51	0.0858026	0.0498355	0.0988295	3.13527	0.0817776	0.0167021
Female	18	HIV-negative	TBM	Alive	60	5930.33	759.396			2449.08	2.39354e+06	270312	6643.09	81.6554	165968	554107	1318.74	0.485384	0.00854226	0.204933	5.99346	0.0102535	0.0200249
Male	42	HIV-negative	TBM	Alive	60	366.356	2727.64			926.975	6.89622e+06	230044	818478	139.636	1.12317e+06	1.39221e+07	2340.01	3.2444	0.00854226	0.592083	5.02806	4.53887	0.170443
Female	42	HIV-negative	TBM	Alive	60	10507.8	781.266	4453.23	1578.9	2143.29	3.51202e+06	185207	153671	44.4515	1.04828e+06	1.30328e+06		0.51604	0.432546	0.301102	3.95314	0.830412	0.158674
Male	41	HIV-negative	TBM	Alive	60	8048.39	1103.27		996.144	841.957	2.07875e+06	214682	45730.2	50.7327	645190	884914		0.96742	0.276051	0.177867	4.65978	0.228291	0.0953313
Male	30	HIV-negative	TBM	Alive	60	1788.41	631.196		416.731	937.945	528949	180887	202830		1.46707e+06	2.85542e+06	2088.93	0.305678	0.120453	0.0446113	3.84958	1.10463	0.224484
Female	44	HIV-negative	TBM	Dead	6		7155.82			1124.44	142796	31511	2.67738e+06	23.1921	186352	3.25902e+06	1921.05	9.45166	0.00854226	0.011409	0.268392	14.9083	0.0232282
Female	21	HIV-negative	TBM	Alive	60	22064.6	1923	2788.66	4057	1470	868852	301229	17255.2	49.7663	1.07749e+06	3.88584e+06	717.172	2.11648	1.09803	0.0738369	6.73469	0.0694506	0.163265
Male	24	HIV-negative	TBM	Alive	60	5180.33	871.76		192.766	1834.75	1.92293e+06	268329	10832.8	40.103	256119	593325	1237.01	0.642891	0.0603084	0.164469	5.94594	0.0336246	0.0341916
Male	23	HIV-negative	TBM	Dead	3	10803.4	879.301			1800.47	2.14038e+06	498428	64399.3	74.8911	216336	379096	1100.79	0.653462	0.00854226	0.183165	11.4624	0.332432	0.0279398
Male	55	HIV-negative	TBM	Dead	18	79411.9	3324.15	12897.7	3305.99	1598.89	6.13143e+06	754706	245584	158.479	4.16347e+06	1.05873e+06		4.08056	0.896347	0.526325	17.6064	1.34312	0.648204
Male	39	HIV-positive	TBM	Dead	2	15374.2	943.401	5646.66	1904.26	1306.82	1.70269e+06	172820	113759	45.901	2.41105e+06	8.1315e+06	569.173	0.743315	0.51992	0.145532	3.65616	0.607773	0.372824
Male	27	HIV-negative	TBM	Alive	60	630.281	922.285		237.336	1168.32	1.96754e+06	76545.6	6692.31		451644	882054		0.713717	0.0722775	0.168305	1.34806	0.0105281	0.064917
Female	48	HIV-negative	TBM	Alive	60		591.228			2030.84	71734.4	2661.9	133558	19.3267	959637	9.24113e+06	641.332	0.249652	0.00854226	0.00529895		0.718214	0.144745
Male	32	HIV-negative	TBM	Dead	1	465.062	1528.6	422.914	484.701	1487.82	3.02414e+06	713563	32486.5	253.663	96195	432884		1.56362	0.138706	0.259153	16.6201	0.154414	0.00906055
Female	17	HIV-negative	TBM	Alive	60	8876.88	1276.72		1064.11	2650.65	6.06145e+06	417527	24670.6	102.432	358937	769366	2175.08	1.21055	0.294303	0.520308	9.52283	0.110815	0.0503486
Female	21	HIV-negative	TBM	Alive	60	4290.11	971.303		480.244	1685.28	3.99504e+06	301507	68338.6	168.143	69627.2	1.55589e+06	8054.57	0.782428	0.137509	0.342633	6.74134	0.354406	0.00488561
Male	34	HIV-negative	TBM	Alive	60	2905.3	1993.13			2859.09	6.57653e+06	727058	27505		341134	394730	457.989	2.21479	0.00854226	0.564596	16.9436	0.126626	0.0475511
Female	29	HIV-negative	TBM	Dead	18	132.229	737.527		294.163	1094.27	2.07243e+06	187146	26824.4		2.38429e+06	386261	4298.62	0.454729	0.087538	0.177324	3.99962	0.12283	0.368618
Male	28	HIV-negative	TBM	Alive	60		2401.11	11897.6		1220.43	5.39468e+06	443925	1.02311e+06	77.7901	887601	914548	15763.1	2.78668	0.00854226	0.462978	10.1557	5.68036	0.133425
Male	36	HIV-negative	TBM	Alive	60	187.834	615.36			1535.82	16099.4	40452.5	21093.6		95145.9	1.23764e+06	611.879	0.283479	0.00854226	0.00051532	0.482756	0.0908619	0.00889569
Female	28	HIV-negative	TBM	Dead	4	9943.22	1029.37	2283.09	1545.47	1509.76	321204	82407	25509	833.949	444065	1.33795e+06		0.863824	0.423569	0.0267489	1.48858	0.115492	0.063726
Male	17	HIV-negative	TBM	Alive	60	3148.48	1358.92		1085.28	1512.51	3.31553e+06	212961	14576.9	36.2376	339501	3.32556e+06	823.938	1.32577	0.299989	0.284207	4.61852	0.0545105	0.0472944
Female	37	HIV-negative	TBM	Alive	60	603.942	2742.72	39724.5	2227.39	1631.81	219001	345433	762804	316.958	492064	1.21028e+06		3.26554	0.606696	0.0179613	7.79443	4.22831	0.0712687
Male	30	HIV-negative	TBM	Alive	60	897.399	518.079			4459.35	554768	41940.8	3403.86		106093	131361		0.147114	0.00854226	0.0468312	0.518439		0.010616
Female	66	HIV-negative	TBM	Alive	60		1106.29		496.958	2025.36	434298	19567.9	192872	81.6554	75631.7	496498	834.247	0.971648	0.141997	0.036473		1.04908	0.00582917
Male	37	HIV-negative	TBM	Alive	60	2118.05	911.728	72.0929	284.135	1117.58	3.13278e+06	182453	11189.2	228.055	485895	665887	5396.47	0.698917	0.084845	0.268495	3.88711	0.0356129	0.0702992
Female	26	HIV-negative	TBM	Alive	60	1326.28	856.677			1442.57	939192	204543	14138.2		24992.3	263832	723.799	0.62175	0.00854226	0.0798849	4.41671	0.0520631
Female	17	HIV-negative	TBM	Alive	60	2573.27	1266.16			2571.12	734494	261716	119378		3.51611e+06	1.12388e+07	876.217	1.19575	0.00854226	0.0622845	5.78739	0.639116	0.546477
Male	74	HIV-negative	TBM	Dead	3		1018.81			4590.99	1.54226e+06	80725.7	5.40692e+06		39567	667887	495.541	0.849025	0.00854226	0.131738	1.44828	30.1343	0.000161846
Female	29	HIV-negative	TBM	Dead	6		407.223			2506.67	41695.3	5613.76	42940.8	34.305	237422	144305			0.00854226	0.00271612		0.212731	0.0312533
Female	28	HIV-negative	TBM	Alive	60	1849.07	1894.34	45.919		1601.64	3.17143e+06	339954	170770	288.451	240812	1.42065e+06	881.371	2.07631	0.00854226	0.271818	7.66309	0.925795	0.0317862
Female	28	HIV-negative	TBM	Alive	60	1272.53	5983.17	5716.92	2463.62	1010.62	2.01932e+06	505821	45240.5	36.7208	806079	128414	7818.95	7.80788	0.670132	0.172757	11.6396	0.22556	0.120614
Female	22	HIV-negative	TBM	Alive	60	291.329	537.686			8385.28	944485	29580.8	288811	113.061	83265.5	1.50876e+06	1259.1	0.174599	0.00854226	0.08034	0.222118	1.58425	0.00702877
Female	70	HIV-negative	TBM	Alive	60	2428	2091.92	10947.6	3485.39	1489.19	6.81381e+06	346362	7585.92	87.9366	150839	296914	5049.66	2.35327	0.944522	0.584998	7.81671	0.0155128	0.0176474
Male	29	HIV-negative	TBM	Dead	13	5326.66	733.756		259.621	1544.04	3.58584e+06	270663	8880.93	298.115	972098	194507	936.595	0.449443	0.078262	0.307449	6.00188	0.0227367	0.146703
Male	31	HIV-negative	TBM	Alive	60	948.215	928.318		596.126	3525.52	2.34724e+06	251425	44021.9	392.333	334902	753274	1007.28	0.722174	0.168628	0.200952	5.54066	0.218762	0.0465717
Male	24	HIV-positive	TBM	Alive	60	311.815	586.703		288.592	1064.1	43067.7	20730.2	16477.9	306.329	82818.7	202027		0.24331	0.0860419	0.00283412	0.00993082	0.0651144	0.00695855
Male	37	HIV-negative	TBM	Alive	60	4656.74	2456.91	596.947	293.049	1069.59	1.22639e+07	454337	973784		2.63335e+06	3.00856e+06	769.451	2.8649	0.0872388	1.0536	10.4053	5.40521	0.407758
Female	46	HIV-negative	TBM	Alive	60	874.784	714.149			1581.07	3.35219e+06	226333	86697	54.598	1.57457e+06	239655		0.421959	0.00854226	0.28736	4.93909	0.456814	0.241377
Female	33	HIV-negative	TBM	Alive	60	43153.4	1452.43	7797.05	3585.67	1293.1	987149	295532	19875	189.402	250664	3.23256e+06	3018.16	1.45685	0.971452	0.0840083	6.5981	0.0840641	0.0333344
Male	21	HIV-negative	TBM	Dead	5	14638.3	6507.28	17687.1	6272.14	1347.95	4.33099e+06	984038	156254	104.848	538724	1.27785e+06		8.54256	1.69289	0.371519	23.1045	0.844822	0.078601
Male	19	HIV-negative	TBM	Alive	60	32638.9	1674.89	7340.15	3352.79	1885.49	2.81819e+06	257952	9714.29	510.226	215475	232372		1.7687	0.908914	0.241445	5.69714	0.0273854	0.0278046
Female	67	HIV-negative	TBM	Alive	60	540.089	836.316			2605.4	1.40981e+06	141426	2985.49	169.592	723942	1.9913e+06	865.172	0.593208	0.00854226	0.12035	2.90351		0.107707
Male	56	HIV-negative	TBM	Alive	60	248.228	349.156			1058.62	514894	62243	567314	249.798	189135	3.41909e+06	594.944		0.00854226	0.0434028	1.00517	3.13782	0.0236654
Male	21	HIV-negative	TBM	Dead	44	103.495	1818.93		1429.59	1129.92	3.05313e+06	502854	62375.3	117.893	403497	239341	9332.81	1.9706	0.39245	0.261646	11.5685	0.321141	0.057351
Female	33	HIV-negative	TBM	Alive	60	322.457	1478.07		603.926	1480.97	1.45775e+06	253574	18639.3	108.23	286590	353042	1203.88	1.4928	0.170723	0.124471	5.59218	0.0771716	0.0389798
Female	19	HIV-negative	TBM	Dead	15	489.273	1129.67		180.509	1982.85	98925.7	172143	20030.3	238.202	774908	697803		1.00442	0.0570169	0.00763691	3.63993	0.0849304	0.115716
Female	27	HIV-negative	TBM	Alive	60	380.191	1822.7		413.388	1049.02	2.93057e+06	502272	18905	40.5861	154548	689505	15793.3	1.97589	0.119555	0.251108	11.5545	0.0786533	0.0182303
Male	16	HIV-negative	TBM	Dead	5	2340.21	1542.17	138.216	336.505	1446.68	2.06312e+06	391321	254072	88.4198	242135	986646	5140.23	1.58265	0.0989086	0.176523	8.89456	1.39047	0.031994
Female	31	HIV-negative	TBM	Dead	7	201.136	932.843		1802.86	2874.17	82476.6	61731.5	562127	254.63	1.36739e+06	436357		0.728516	0.49269	0.00622258	0.992905	3.10888	0.20882
Male	16	HIV-negative	TBM	Alive	60	727.923	1431.31	8260.37	3401.82	1276.65	1.26056e+06	189539	44124.6		1.67608e+06	973196	1242.17	1.42726	0.92208	0.107517	4.05699	0.219335	0.257329
Female	46	HIV-negative	TBM	Alive	60			356.791		1700.37	8.16407e+06	154486	178627	259.945	242803	1.52643e+06	17033.2		0.00854226	0.701096	3.21663	0.969621	0.032099
Female	40	HIV-negative	TBM	Alive	60	291.595	4011.15	611.182		1005.14	4.22315e+06	479483	200785	47.8337	115506	5.90918e+06	2007.94	5.04358	0.00854226	0.362247	11.0082	1.09323	0.0120951
Male	31	HIV-negative	TBM	Alive	60	1152.54	859.694			1232.77	1.50731e+06	131323	16281	33.3386	984985	1.15606e+06	1044.83	0.625978	0.00854226	0.128733	2.66131	0.0640161	0.148728
Male	36	HIV-negative	TBM	Alive	60	2197.34	1990.87			2388.74	3.66093e+06	349232	44789.9	110.646	319675	3.58632e+06		2.21162	0.00854226	0.313906	7.88551	0.223046	0.0441789
Male	23	HIV-negative	TBM	Alive	60		673.427			2034.96	112623	16586.2	82965.6	80.2059	301299	698627	357.85	0.364876	0.00854226	0.00881464		0.435999	0.0412912
Female	31	HIV-negative	TBM	Dead	8	1673.74	1403.41	1258.18	412.274	2183.05	2.56177e+06	248345	3879.09	204.38	473947	143666		1.38814	0.119256	0.219398	5.46682		0.0684217
Female	22	HIV-negative	TBM	Alive	60		791.069			2763.1	426112	24983.8	4961.1		765466	470054	5354.5	0.529782	0.00854226	0.0357692	0.111907	0.000870963	0.114232
Male	46	HIV-negative	TBM	Dead	1	889.949	2650.72	202.503	557.127	1298.59	5.76666e+06	656140	31003.1	44.4515	841102	445181		3.13658	0.158155	0.494961	15.2434	0.146139	0.126118
Female	46	HIV-negative	TBM	Alive	60	465.062	1496.92		576.07	1737.39	286254	504330	24380.3	123.208	628797	153920	2547.66	1.51922	0.163242	0.0237438	11.6039	0.109196	0.0927554
Female	18	HIV-negative	TBM	Alive	60		1078.39	14754.7		3647.56	5.59697e+06	321765	488481		156562	187608	5449.48	0.932535	0.00854226	0.480371	7.22702	2.69806	0.0185467
Female	58	HIV-negative	TBM	Dead	3	95.7793	582.933		179.395	991.424	1.09074e+06	133295	809096		110649	412914	670.785	0.238024	0.0567177	0.0929151	2.7086	4.48654	0.0113318
Male	37	HIV-negative	TBM	Alive	60	4486.73	953.958			1991.08	3.04888e+06	406410	9266.21	48.3168	143344	1.45546e+06	2335.6	0.758115	0.00854226	0.261281	9.25631	0.0248859	0.0164698
Female	20	HIV-negative	TBM	Alive	60	5613.46	1362.69		435.674	1604.38	1.35032e+06	389107	96535.2		4.36207e+06	321380	3043.93	1.33106	0.12554	0.115235	8.84149	0.511694	0.679414
Female	23	HIV-negative	TBM	Alive	60	1426.05	1845.33	2504.42	851.291	825.501	223367	162244	53931.4	356.095	196673	411877	2951.89	2.0076	0.237151	0.0183366	3.40262	0.274039	0.02485
Male	22	HIV-negative	TBM	Alive	60	1665.5	624.409			877.609	1.19388e+06	239978	114335	94.2178	1.21806e+06	301751	656.794	0.296164	0.00854226	0.101783	5.26624	0.610987	0.185354
Male	17	HIV-negative	TBM	Alive	60	3505.52	2310.62		339.848	1350.7	1.9376e+06	455362	9784.72		112208	553731	1156.02	2.65983	0.0998063	0.165731	10.4299	0.0277783	0.0115769
Male	48	HIV-negative	TBM	Alive	60	2046.22	667.394			1171.06	25517.9	58926.5	51971	433.402	448480	2.54388e+06		0.356419	0.00854226	0.00132515	0.925657	0.263104	0.0644197
Male	49	HIV-negative	TBM	Alive	60		488.668			1764.82	553929	24596.8	201649	209.212	63109.9	798471	1590.44	0.105887	0.00854226	0.0467591	0.102628	1.09805	0.00386145
Female	17	HIV-negative	TBM	Alive	60	9254.67	1309.9		650.725	1476.85	1.32048e+06	268347	8319.98	181.671	115079	128059	641.332	1.25706	0.18329	0.112669	5.94635	0.0196076	0.012028
Male	38	HIV-negative	TBM	Alive	60		611.589			1974.62	266374	7155.65	182044	42.5188	210599	720164	775.341	0.278194	0.00854226	0.0220345		0.988684	0.0270384
Male	67	HIV-negative	TBM	Alive	60		12111.9	1716.45	1432.93	1335.61	4.21203e+06	1.09366e+06	4.13435e+06	74.8911	8.41208e+06	169186	10528.6	16.3989	0.393347	0.361291	25.7326	23.0356	1.31584
Female	29	HIV-negative	TBM	Alive	60	3048.97	739.789			1542.67	1.88437e+06	224298	5796.15	115.96	72883.5	1.26828e+07		0.4579	0.00854226	0.161153	4.89031	0.0055291	0.0053973
Male	27	HIV-negative	TBM	Alive	60	2220.22	837.824			1974.62	1.61736e+06	274329	8091.7	112.095	470936	184178	3133.76	0.595322	0.00854226	0.138195	6.08977	0.0183342	0.0679485
Male	29	HIV-negative	TBM	Dead	29	1814.75	2779.68		2009	1064.1	8.58674e+06	905724	49056.8		235764	533041		3.31734	0.548047	0.737438	21.227	0.246848	0.0309929
Male	35	HIV-positive	TBM	Alive	60	164.155	1091.96			959.885	266941	44543	242761	53.6317	1.95782e+06	621735	4242.66	0.951563	0.00854226	0.0220833	0.580824	1.32738	0.301602
Male	26	HIV-negative	TBM	Dead	2	267.118	1101.77	554.242		5077.79	1.92671e+06	276804	25762.8		430360	393359		0.965305	0.00854226	0.164794	6.14911	0.116908	0.0615723
Male	33	HIV-negative	TBM	Alive	60	8047.32	1461.48		1231.25	3162.14	4.3071e+06	504644	87936.9	13.5287	1.75208e+06	2.30525e+06		1.46954	0.339187	0.369465	11.6114	0.46373	0.269272
Male	30	HIV-positive	TBM	Dead	10	984.398	759.396			1666.09	700465	31433.8	11786.6	140.602	1.02767e+06	2.93506e+06	1910.74	0.485384	0.00854226	0.0593586	0.266542	0.0389455	0.155436
Female	58	HIV-negative	TBM	Alive	60		1085.17			2248.87	529307	8696.29	195903	69.5762	456926	1.26857e+06	1591.92	0.942049	0.00854226	0.0446421		1.06599	0.065747
Female	55	HIV-negative	TBM	Dead	3	1749.3	3638.62	5121.81	2563.9	1014.74	4.53494e+06	850439	99728.6	98.0832	325196	570196	868.854	4.52137	0.697062	0.389055	19.9016	0.529508	0.0450464
Female	47	HIV-negative	TBM	Dead	5	2020.41			308.649	2701.39	2.25626e+06	197358	15127.7	207.762	1.4646e+06	3.40445e+06	893.152		0.0914279	0.193129	4.24445	0.0575828	0.224096
Male	37	HIV-negative	TBM	Alive	60		754.117			1109.35	358756	32144.4	136180	595.747	2.42719e+06	191732		0.477985	0.00854226	0.0299777	0.283578	0.732842	0.375361
Male	37	HIV-negative	TBM	Alive	60		736.773			3133.34	734971	8999.94	131734	69.5762	357243	1.07356e+06	741.471	0.453672	0.00854226	0.0623255		0.708041	0.0500824
Female	28	HIV-negative	TBM	Dead	20	119079	2086.64	9735.29	4804.67	1486.45	3.56515e+06	709943	81007	130.455	267048	833152		2.34587	1.29881	0.305671	16.5333	0.425074	0.035909
Male	22	HIV-negative	TBM	Dead	2	13742.5		1719.21	415.617	682.89	1.85301e+07	397624	18874.4		89255.3	395263	3724.29		0.120154	1.59239	9.04568	0.0784829	0.00797002
Male	45	HIV-negative	TBM	Alive	60	12542.6	782.02	4310.88	2136.03	1205.34	1.41959e+06	99313	20874.6	73.4416	848659	1.9601e+06	2012.35	0.517097	0.582159	0.12119	1.89389	0.0896406	0.127305
		HIV-positive	Cryptococcal meningitis			310.172	1007.5		968.301	1601.1	878945	84372.2	33278.7	93.2941	517040	910303	2547.25	1.63098	0.285464	0.0146937	1.03257	0.191649	0.0729654				43472	11309	103	460610	6857	1291970	154	293970	644682	61646
		HIV-positive	Cryptococcal meningitis			45.1707	506.052		324.195	1995.22	274997	30493.3	98467.2	126.306	928410	78713.8		0.552484	0.108076		0.21759	0.498374	0.142169		1246	930	35897	13918	551	2723513	29701	1676022	493	1274827	637439	192452
		HIV-positive	Cryptococcal meningitis				247.659		305.629	1195.39	157648	8697.69	64715	222.471	175741	85261.7	632.42		0.102962			0.339563	0.0155494		1709	686	65209	12609	210	715280	17338	1417403	350	679069	219702	81973
	34	HIV-positive	Cryptococcal meningitis			420.087	552.056		232.792	1344.64	394494	83821	5603.5	284.188	217465	125805		0.651429	0.0829029	0.00194517	1.02424	0.0614319	0.0225686		9091		22967	10108	554	2421428	21895	1585635	1401	958931	95277	324612
	29	HIV-positive	Cryptococcal meningitis			374.164	1012.87		395.604	1173.66	316663	22450.8	15054.8	137.788	646680	183853	595.758	1.64252	0.127742		0.095938	0.105902	0.0947746		465		47099	11007	263	1558453	23121	1225930	375	376913	227782	51189
		HIV-positive	Cryptococcal meningitis			235.64	626.431			2095.2	220674	11748.2	53971.8	72.4824	133370	257303	868.432	0.811389	0.0187913			0.289014	0.00842146				142561	8125	328	1751741	14895	2298711	637	230647	215464	241786
	27	HIV-positive	Cryptococcal meningitis				845.72			9183.52	158295	11392.9	80741.7	100.471	165131	112618	1088.4	1.28303	0.0187913			0.414972	0.0137645			783	122262	8529	135	1196452	19477	2078146	505	594719	155721	244579
	30	HIV-positive	Cryptococcal meningitis				769.812		317.054	1107.01	1.12527e+06	14447.5	83438.4	223.188	2.26877e+06	836919		1.11977	0.106109	0.0211758		0.42766	0.367655		1330		133463	6684	440	3281159	15345	661713	1133	3143302	446228	185592
	25	HIV-positive	Cryptococcal meningitis			222.842	835.752			539.014	301599	31078.2	40933.9	88.2706	247011	304165	468.968	1.26159	0.0187913		0.226438	0.227668	0.0275391				104174	11691	77	195327	20877	2292103	329	897166	384168	106583
	25	HIV-positive	Cryptococcal meningitis			176.918	1203.02		268.497	1499.68	1.04013e+06	24729.9	67778.1	62.4353	161254	266168		2.0515	0.092736	0.0189353	0.130412	0.353975	0.0131123		1490	593	82087	10622	135	2634083	23508	2025976	182	663285	2131660	313546
	31	HIV-positive	Cryptococcal meningitis				540.555			963.56	112757	9186.75	41120.9	153.576	252794	120912	2426.57	0.626693	0.0187913			0.228548	0.028512	140			426273	23078	301	960018	18424	1064922	2740	1524332	160820	196714
	27	HIV-positive	Cryptococcal meningitis			476.55	888.657		588.407	1519.96	452540	69360	41118.1	174.388	2.16242e+06	321861	729.04	1.37537	0.18084	0.00347267	0.805496	0.228535	0.349765				80165	11185	57	1015337	9587	1701490	510	2260581	451205	154418
	33	HIV-positive	Cryptococcal meningitis				800.482		214.226	1093.97	625988	31532.2	183317	904.953	522201	931108	3844.17	1.18573	0.0777897	0.00803705	0.233305	0.897609	0.0738336				19518	29143	505	621880	18957	1235032	1007	499893	233444	59630
	28	HIV-positive	Cryptococcal meningitis			143.793	703.105			1637.33	423794	23712.6	98219.4	200.941	162118	515307	1040.67	0.976297	0.0187913	0.00271621	0.115025	0.497208	0.0132576			137	52750	10884	151	3583065	16471	1752374	619	128055	258139	127046
	26	HIV-positive	Cryptococcal meningitis			97.8698	537.488			1895.24	207552	21687.5	68975.5	68.1765	912023	215018	1789.57	0.620096	0.0187913		0.084392	0.35961	0.139413	198		108	6929	11733	403	1811744	25142	2770969	326	985626	329541	275980
	28	HIV-positive	Cryptococcal meningitis			688.1	686.237		282.778	1060.64	551940	36170.1	21425.8	139.941	390865	1.15308e+07	774.867	0.940017	0.0966692	0.00608842	0.303459	0.135879	0.0517393		2723		114457	12200	611	443748	8261	2236342	476	612320	17541829	60795
	27	HIV-positive	Cryptococcal meningitis			545.812	610.329		358.471	2425.56	630340	54885.4	6547.38	188.024	123276	413921		0.776759	0.117515	0.00815156	0.586551	0.065873	0.00672343		3556		44048	10952	266	600495	16044	719966	549	486837	800622	107743
		HIV-positive	Cryptococcal meningitis			322.97	605.729		428.452	2706.66	491587	42157.7	10122.4	94.7294	281671	3.13566e+06	850.864	0.766864	0.136788	0.00450021	0.394029	0.082694	0.0333698	78			92298	10308		1507013	10508	2404222	350	431438	3184471	137375
	60	HIV-positive	Cryptococcal meningitis			1007.31	552.823			1719.92	315849	68226.5	8024.42	226.776	2.06545e+06	111978	1192.28	0.653078	0.0187913		0.78835	0.0728228	0.333451
		HIV-positive	Cryptococcal meningitis				1420.78			3110.92	1.30187e+06	49361.2	3.81378e+06	140.659	1.45322e+06	106037	25670.7	2.51983	0.0187913	0.0258233	0.50299	17.9796	0.230457		1932		9257	9097	355	2478981	16906	3342745	219	1336947	161664	316750
	25	HIV-positive	Cryptococcal meningitis			119.702	483.049		478.438	889.663	123728	9405.61	67700	196.635	104839	195043	614.471	0.503012	0.150554			0.353608	0.00362171		1732	1234	47451	7264	182	1570421	19316	1778163	490	1106882	258988	114075
	35	HIV-positive	Cryptococcal meningitis				417.876			922.989	111261	4181.32	477.243	41.6235	207324	139537	608.742	0.36284	0.0187913			0.0373118	0.0208626		553		31426	9246		1001592	6407	1348718	251	529580	17386565	104197
	44	HIV-positive	Cryptococcal meningitis			674.548	1167.75		768.357	1328.7	1.11909e+06	115113	55577.1	197.353	1.46079e+06	115362	918.078	1.97564	0.230399	0.0210132	1.49756	0.296567	0.231731				8382	24493	563	4284760	54552	1770594	323	1770037	491656	357195
	27	HIV-positive	Cryptococcal meningitis				601.128			4475.84	120545	7249.43	11832.7	91.1412	28335.2	387252	536.182	0.75697	0.0187913			0.0907416			2890	1111	108734	5917	429	284488	8732	475375	721	171479	2446514	8580
	45	HIV-positive	Cryptococcal meningitis			243.169	665.535			1974.94	451367	12152.2	22405.3	44.4941	1.37833e+06	226480	747.371	0.895492	0.0187913	0.0034418		0.140488	0.217859		1999		48432	10485	242	2243734	21212	1997681	847	436348	903246	269269
	34	HIV-positive	Cryptococcal meningitis				1032.81			1244.66	386491	45808.1	49926.3	125.588	160875	149338	3055.55	1.6854	0.0187913	0.00173456	0.449245	0.269979	0.0130486		2014	1304	33183	8540	717	1143905	14950	1615406	179	1157973	93226	52116
	23	HIV-positive	Cryptococcal meningitis				439.345			3545.61	105685	7507.47	45594.5		61669.2	163328	724.075	0.409014	0.0187913			0.249597		102	2143		83873	19637	186	1518182	29733	1143290	364	654896	146827	78211
		HIV-negative	Bacterial meningitis			4525.35	652.5			1001.23	590173	425257	22081.4	197.353	871987	4.97889e+06	1597.09	0.867458	0.0187913	0.00709455	6.18887	0.138964	0.132677
		HIV-negative	Bacterial meningitis			255.214	514.486		254.215	1309.86	1.57501e+06	349971	11918.5	115.541	120049	676182	1086.88	0.570624	0.0888028	0.0330111	5.05007	0.0911453	0.0061806
		HIV-negative	Bacterial meningitis				921.627		275.637	1327.25	1.38552e+06	446127	327117	50.2353	2.96292e+06	1.04902e+06	2611.02	1.44628	0.0947026	0.0280245	6.50456	1.57422	0.48443				432072	26232		688749	6176	848873	195	803323	181362	66340
		HIV-negative	Bacterial meningitis				612.629			649.135	43921.4	15352.7	458762	26.5529	12860.4	227602	669.082	0.781706	0.0187913			2.19363			1213		23216	13723		789683	7800	334880	482	110072	126219	15737
		HIV-negative	Bacterial meningitis			6847.87	601.128			862.132	590819	1.08044e+06	1.61162e+06	58.8471	745657	420624	459.039	0.75697	0.0187913	0.00711156	16.0993	7.61807	0.111425				41713	4225	1334	2486727	4443	689084	174	120916	186521	338007
		HIV-negative	Bacterial meningitis			1785.75	891.724			746.215	571856	224004	56379.2	137.071	361527	1.31767e+06	1687.6	1.38197	0.0187913	0.00661252	3.14467	0.300342	0.0468039		1058		68030	4908	120	3884404	10312	395885	149	2034466	660311	87371
		HIV-negative	Bacterial meningitis			12685.4	1250.56		1349.62	701.298	2.39052e+06	1.01325e+06	141477	89.7059	2.78953e+06	286297	1527.58	2.15374	0.390482	0.0544715	15.083	0.700743	0.455262	55			161833	7717	19	1252693	9040	649361	271	469220	121111	185113
		HIV-negative	Bacterial meningitis			1915.99	877.156			1259.15	1.63103e+06	528192	109817		2.00458e+06	397445	5771.21	1.35064	0.0187913	0.0344852	7.74588	0.551776	0.323212	276	2080		121670	17151		3953793	16967	488689	460	1431678	115021	82551
		HIV-negative	Bacterial meningitis			8689.33	637.165			1605.45	1.24416e+06	240305	9197.76	96.8824	736986	611671	1344.66	0.834476	0.0187913	0.0243045	3.39125	0.0783436	0.109966	190	1476		109871	5172		1441912	6126	467313	132	309668	84576	45853
		HIV-negative	Bacterial meningitis			824.364	1016.7			2051.73	882216	390195	189719	96.1647	1.19411e+06	2.93731e+06	6402.11	1.65077	0.0187913	0.0147798	5.65851	0.927731	0.186867		971		38697	5373	91	3812203	13195	360467	122	2753866	3827864	61680
		HIV-negative	Bacterial meningitis			9416.58	562.791		401.317	1930.02	1.89251e+06	707185	28332.8	175.106	1.70582e+06	1.37357e+06	677.866	0.674516	0.129315	0.0413661	10.4534	0.168378	0.272951		384	121	133395	5916		2196623	5069	322671	248	905426	205592	38033
		HIV-negative	Bacterial meningitis			640.67	1083.41		1158.25	1224.37	294398	95843.5	2.3001e+06	48.8	475035	312342	1134.61	1.79424	0.337776		1.20609	10.8575	0.065899	74			187666	5138		1896161	3318	707045	231	700583	162538	198491
		HIV-negative	Bacterial meningitis			19327.8	527.521		1069.7	1647.47	3.27927e+06	2.46477e+06	24991.1	429.871	731557	673648	431.924	0.598658	0.31339	0.0778596	37.039	0.152654	0.109053
		HIV-negative	Bacterial meningitis			178.424	1278.93	386.953		6140.7	1.23515e+06	420567	123553		27166.8	1.41851e+06	755.009	2.21475	0.0187913	0.0240675	6.11792	0.616406
		HIV-negative	Bacterial meningitis				601.895		368.469	1889.45	540196	9281.32	89870.1	139.224	139633	279938	2705.73	0.758619	0.120269	0.0057794		0.457923	0.00947512
		HIV-negative	Bacterial meningitis				1819.49			1547.49	1.47077e+06	618083	250366	59.5647	90391.6	2.76491e+06	1870.53	3.37735	0.0187913	0.0302678	9.10559	1.21309	0.00119131
		HIV-negative	Bacterial meningitis			2445.24	861.055		381.322	1017.17	1.10729e+06	1.25024e+06	377433	163.624	1.59802e+06	750521	557.95	1.31601	0.123809	0.0207026	18.6677	1.81096	0.254816
		HIV-negative	Bacterial meningitis			4273.14	1330.3		1463.88	1906.83	2.86066e+06	1.66504e+06	1.80628e+06	139.941	911413	874229	3728.83	2.32524	0.421947	0.0668436	24.9421	8.53396	0.13931
		HIV-negative	Bacterial meningitis			3352.42	930.062		472.725	530.32	558863	170020	734149	38.0353	425857	856603	1680.34	1.46442	0.148981	0.00627061	2.3281	3.48938	0.0576259		603		20869	103182	32	642413	2684	467857	96	191973	133208	14631
		HIV-negative	Bacterial meningitis			1361.9	540.555		242.789	1249.01	339378	143886	1.95864e+06	45.9294	1.17173e+07	205116	4845.12	0.626693	0.0856562	0.000494753	1.93279	9.25087	1.95715				54736	30634		1420010	4276	460682	308	1147922	122163	26153
		HIV-negative	Bacterial meningitis			19886.4	1212.99			4067.24	3.39912e+06	1.30485e+06	72055.9	130.612	2.28965e+06	667278	468.587	2.07293	0.0187913	0.0810134	19.4938	0.374103	0.371168				293346	9457		2249031	11354	1796478	643	145301	141809	529648
		HIV-negative	Bacterial meningitis			444.178	687.004			1333.04	902374	145982	199136	124.153	6.71332e+06	323388	575.136	0.941667	0.0187913	0.0153103	1.96449	0.972042	1.11535	129	1810	755	76442	7693	139	5426942	37685	179422	193	944171	163357	104460
		HIV-negative	Bacterial meningitis			523.98	2022.67		1153.96	1454.76	4.51303e+06	1.7603e+06	421019	113.388	707254	600671	11412.6	3.81436	0.336596	0.110326	26.383	2.01604	0.104965
		HIV-negative	Bacterial meningitis			9542.3	1153.95			1380.86	1.57562e+06	842252	59782.6	105.494	1.41281e+06	581302	560.623	1.94595	0.0187913	0.0330271	12.4964	0.316355	0.223659
		HIV-negative	Bacterial meningitis				1039.71		1118.26	801.276	464216	43873.5	498668	112.671	833472	2.59406e+06	2392.2	1.70024	0.326763	0.00377993	0.419982	2.3814	0.126198	109			208854	7927		1344206	6121	390492	364	378981	632988	35671
		HIV-negative	Bacterial meningitis			231.876	490.717		235.649	1398.25	898136	157119	153666	48.0824	1.41944e+06	525889	487.299	0.519503	0.0836896	0.0151987	2.13296	0.758096	0.224774	250	4189		202397	9677		1655646	20623	612642	542	3356590	151276	243822
		HIV-negative	Bacterial meningitis			4526.85	871.789		934.025	1996.67	1.30039e+06	581300	323031	78.9412	7.71362e+06	695822	3015.45	1.33909	0.276025	0.0257843	8.5492	1.55499	1.28363	210	926		17023	15472		4682248	12966	760034	452	2379750	179159	101246
		HIV-negative	Bacterial meningitis			10079.1	1000.6		646.962	1577.92	728685	795292	472145	87.5529	289052	586178	3913.29	1.61614	0.196967	0.0107396	11.7861	2.2566	0.0346116
		HIV-negative	Bacterial meningitis			747.574	4045.35		3436.18	2402.38	1.34998e+07	1.52228e+06	427444	189.459	176113	490528	1822.41	8.16463	0.965126	0.346817	22.7826	2.04628	0.0156121
		HIV-negative	Bacterial meningitis			55.7105	765.978		821.199	962.111	1.14553e+06	556589	1.88217e+06	21.5294	1.24166e+07	304555	3584.09	1.11152	0.244952	0.021709	8.17542	8.89105	2.0748

## Sheet: 3. pooled_CSF_relative
Sample	phenylalanine-d8	valine-d8	3-hydroxyanthranilic acid	3-indoleacetic acid	3-methoxyanthranilate	5-HIAA	5-methoxytryptophol	kynurenic acid	L-kynurenine	L-tryptophan	N-acetylserotonin	niacinamide	quinolinic acid	xanthurenic acid
PREFB02	5.49667e+06	787490	11136.8	2284.9	3021.14	798.349	1654.71	1.5151e+06	298118	181218	118.412	670411	1.00612e+06	2326.13
PREFB02	5.78609e+06	800313	11693.3	2550.42	2752.39	1073.03	1845.72	1.46183e+06	317341	196453	120.792	661257	1.04093e+06	2340.75
PREFB03	5.69918e+06	817622	13259.1	3129.09	3042.54	1024	2128.53	1.43204e+06	386893	219001	116.259	739097	1.12537e+06	2395.63
PREFB03	5.96803e+06	795830	11662.2	2490.85	2858.46	1100.88	1535.82	1.35903e+06	273428	191762	70.5426	656436	996935	2316.45
PREFB04	5.36693e+06	798295	11619.4	2688.21	2599.09	1053.99	1818.45	1.55661e+06	313067	203265	127.741	643247	1.04238e+06	2003.81
PREFB04	5.32265e+06	811674	11498	2615.28	3006.32	990.572	1696.25	1.57589e+06	307710	175342	145.434	639655	1.03552e+06	2017.51
PREFB05	5.65326e+06	783174	11107.5	3155.16	2820.82	1151.11	1854.67	1.5695e+06	294269	204349	118.412	668064	1.03863e+06	1897.26
PREFB05	5.08706e+06	783641	11688.8	2532.33	2970.96	933.745	1689.4	1.51145e+06	293250	208812	145.917	634590	1.03793e+06	2359.9
PREFB06	5.34199e+06	794540	11392	2376.91	2777.15	711.23	1814.1	1.36338e+06	274711	207083	125.588	641669	1.02399e+06	2145.49
PREFB06	5.58549e+06	815524	11699.4	2611.51	2908.05	1080.83	1764.82	1.58348e+06	341086	205024	118.376	651072	1.01096e+06	2354.74
PREFB07	5.4916e+06	815325	11448.5	2512.62	2768.59	1181.1	1809.75	1.48208e+06	308367	184883	123.435	649411	1.01892e+06	2228.36
PREFB07	5.66136e+06	736684	11530	2659.77	2969.12	1165.51	1873.15	1.72128e+06	283867	204961	123.691	628937	1.00677e+06	2585.94
PREFB08	4.9569e+06	793359	11180.5	2851.52	3142.71	1316.78	1425.78	1.41417e+06	278354	190117	117.694	667324	1.02734e+06	2278.39
PREFB08	5.34364e+06	777270	11567.7	2608.49	2913.1	1012.86	1660.6	1.52514e+06	331271	205623	133.354	655551	1.02806e+06	2009.41
PREFB09	5.01235e+06	792793	11386.8	2223.56	2832.8	1001.15	1654.71	1.52503e+06	326139	204602	121.282	670307	991852	2004.57
PREFB10	5.89636e+06	745099	12640.3	2626.1	2795.13	1052.56	1470.7	1.50996e+06	331916	204743	133.482	645365	1.042e+06	2168.41
PREFB11	5.26913e+06	766378	11634.5	2348.54	2533.17	1228.23	1757.59	1.44521e+06	303306	180992	114.106	656886	1.03419e+06	2078.28
PREFB11	5.29032e+06	791517	11951.4	2557.97	2711.98	1046.29	1708.6	1.77126e+06	288787	194425	114.028	635343	1.02396e+06	2082.3
PREFB12	5.31397e+06	804371	11451.5	2492.69	2789.14	926.884	1608.35	1.52261e+06	305358	195883	106.929	628340	1.05106e+06	1959.89
PREFB12	5.69921e+06	814993	11354.9	2509.7	2791.88	1024	1631.81	1.80464e+06	345316	221022	135.287	648057	1.03078e+06	2183.18
PREFB13	4.84681e+06	764362	10199.5	2591.6	2657.3	1035.43	1934.36	1.45911e+06	307152	209489	128.459	631282	989478	2161.15
PREFB13	5.66845e+06	751661	11468	2617.54	2718.86	1086.4	1615.35	1.59814e+06	278311	185844	120.309	640107	1.06202e+06	2367.26
PREFB14	5.96871e+06	798217	11247.5	2621.5	2717.23	1071.13	1774.98	1.48866e+06	326835	195081	127.024	648706	1.01207e+06	2209.27
PREFB14	5.61825e+06	807033	11171.6	2659.02	3038.46	944.888	1568.73	1.89762e+06	316078	211721	128.523	654197	1.02827e+06	1984.37
PREFB15	5.85255e+06	790461	11523	3016.37	2992.03	982.583	1719.92	1.52487e+06	309943	215713	119.129	650754	1.00993e+06	2167.64
PREFB15	5.35604e+06	800856	11496.7	2496.13	3144.53	1015.09	1568.73	1.31232e+06	289371	176748	134.804	674613	1.0158e+06	1942.4
PREFB16	5.99858e+06	851189	11730.1	2513.39	3009.16	978.298	1750.35	1.46873e+06	303732	192610	117.694	671256	993100	2262.73
PREFB16	5.97325e+06	821007	11476.8	2544.39	2947.08	1124.28	1952.68	1.3656e+06	305453	192992	123.208	657844	1.01139e+06	2154.46
PREFB17	5.88173e+06	826403	11886.7	2945.83	2666.72	992.58	1760.49	1.51471e+06	285671	187365	122.718	649204	996636	2199.72
PREFB17	5.61051e+06	750137	12195.6	2665.05	2959.02	980.544	1623.58	1.69641e+06	288946	196984	113.545	657800	1.01991e+06	2075.68
PREFB18	5.26797e+06	806454	11329.6	2948.13	2863.62	901.177	1575.02	1.44969e+06	302227	196849	116.976	657707	989330	2295.58
PREFB18	5.18244e+06	791438	12067.4	2490.1	2735.85	1034.03	1884.12	1.18555e+06	280230	180366	108.23	656958	1.02053e+06	2058.01
PREFB19	5.81248e+06	789191	12377.5	2493.45	2772.02	1111.12	1790.92	1.49393e+06	309922	204097	122	667797	1.0059e+06	2111.12
PREFB19	5.91625e+06	806019	11468.2	2735.94	2941.57	1036.26	1690.77	1.41994e+06	308781	184016	133.838	649446	1.0255e+06	2123.54
PREFB20	5.62303e+06	816491	11021.6	2445.92	3000.59	1052.56	1969.14	1.49554e+06	318248	209971	113.388	644349	1.00306e+06	2375.39
PREFB20	5.56478e+06	757681	11204.3	2571.54	2939.74	998.372	1788.13	1.285e+06	316374	189424	114.028	666364	995895	1977.75
PREFB21	5.50863e+06	784849	11672.9	2687.44	2718.94	1103.98	1580.82	1.51685e+06	293708	183404	135.635	658173	1.00598e+06	2058.04
PREFB21	5.31502e+06	757913	10683.6	2680.13	2762.95	1067.46	1596.15	1.29617e+06	292859	169688	125.141	653584	1.02193e+06	2175.82
PREFB22	5.67695e+06	798975	10614.4	2330.14	2765.17	1055.42	1511.27	1.40818e+06	302513	194897	111.235	665133	981514	2173.37
PREFB22	5.56433e+06	786146	11245.6	2726.89	2897.95	966.059	1624.95	1.52878e+06	288274	198753	124.174	661214	1.02599e+06	2199.38
PREFB23	5.83238e+06	801970	11805.4	2824.69	3010.87	1156.82	1630.08	1.4786e+06	293977	217864	127.741	671719	1.02078e+06	1996.93
PREFB23	5.24088e+06	815034	11848.2	2696.72	2869.02	946.002	1561.87	1.65006e+06	301167	200748	117.893	671158	1.02051e+06	2202.32
PREFB24	5.46041e+06	803009	11245.2	2625.33	2831.09	1101.12	1412.74	1.54078e+06	307694	182703	109.8	645668	1.05647e+06	2125.25
PREFB24	5.47575e+06	820509	11367.4	2685.41	2726.21	952.688	1755.22	1.61086e+06	317965	212601	118.859	654033	1.05e+06	2062.42
PREFB25	4.94594e+06	858198	11931.1	2631.47	2712.09	1205.38	1596.76	1.48719e+06	282185	174619	130.612	649183	1.06537e+06	2362.79
PREFB25	5.1361e+06	799590	12145.9	2541.38	2806.11	980.544	1640.03	1.51588e+06	306853	193143	119.826	656064	1.01888e+06	2091.88
PREFB26	5.4431e+06	819636	11626.2	2330.9	2925.26	896.893	1735.86	1.46599e+06	305543	203528	121.282	645203	1.02564e+06	2079.42
PREFB26a	4.77954e+06	787680	10498.4	2876.83	2889.3	905.462	1608.35	1.3553e+06	272914	171103	127.741	648638	1.03618e+06	1869
PREFB27	5.85091e+06	756618	11415.4	2567.83	2826.81	1102.55	1372.17	1.53935e+06	295663	176383	125.588	656508	1.03181e+06	1969.44
PREFB28	5.76962e+06	795036	10699.4	2547.89	2706.1	1252.51	1375.06	1.48371e+06	270378	192738	122	649497	1.01955e+06	2260.06
PREFB29	5.47243e+06	808897	12567.2	2727.31	2986.04	952.591	1776.43	1.49599e+06	329552	194481	111.953	638390	1.00719e+06	2096.61
PREFB30	5.3188e+06	777554	11896.4	2656	2801.13	922.6	1618.49	1.4703e+06	308692	191769	118.412	665847	1.03743e+06	2242.88
PREFB31	5.40553e+06	821768	11594.6	2332.44	3033.98	1075.41	1431.57	1.56272e+06	289469	206193	125.588	635247	1.00971e+06	2137.09
PREFB32	5.58203e+06	762806	11725.5	2329.37	2973.2	1082.56	1566.33	1.49902e+06	286772	188478	122	655129	1.02506e+06	2091.64
PREFB33	5.35611e+06	804795	10763.4	2435.95	3087.06	928.312	1864.81	1.50732e+06	283875	201097	119.847	656344	998849	2106.16
PREFB34	5.05619e+06	791836	11209.9	2751.08	2671	1006.86	1930.02	1.38194e+06	309222	176958	116.259	644883	1.02815e+06	2351.33
PREFB35	5.83588e+06	802715	11429.7	2547.13	2825.1	1103.98	1554.74	1.46042e+06	292049	182707	141.376	658544	1.00857e+06	2137.47
PREFB36	5.22305e+06	779625	11136.8	2657.54	2918.41	1001.15	1789.47	1.51502e+06	281215	171779	122.718	657769	1.05579e+06	2058.04
PREFB37	5.14887e+06	747866	11020.9	2256.53	3356.73	888.324	1786.57	1.52724e+06	304053	192040	121.282	659283	1.05259e+06	2224.16
PREFB38	5.41509e+06	787930	11435	2501.89	3103.32	1009.72	1493.88	1.69481e+06	328859	191673	115.541	655696	1.05126e+06	2009.54
PREFB39	5.45244e+06	811846	11355.1	2361.57	2766.88	916.887	1835.83	1.50843e+06	308987	186862	119.847	653100	1.03947e+06	2049.25
PREFB40	5.79327e+06	809391	11063.8	2780.98	3081.92	929.741	1661.96	1.47738e+06	299612	207668	127.741	668212	992329	2153.89
PREFB41	5.60315e+06	784200	11899.5	2779.45	2605.94	1121.12	1617.04	1.52124e+06	288352	175964	117.694	667870	1.04781e+06	2310.47
PREFB42	5.09428e+06	812885	11793.3	2764.88	2859.34	1016.86	1744.55	1.43285e+06	292929	196103	135.635	611479	1.03049e+06	2190.17
PREFB43	5.57851e+06	776743	10944.1	2588.53	2593.95	1036.85	1472.15	1.5447e+06	308438	201639	119.129	645213	991788	2098.9

## Sheet: 4. pooled_CSF_absolute
Sample ID	[3-indoleacetic acid]	[5-HIAA]	[kynurenic acid]	[L-kynurenine]	[L-tryptophan]	[niacinamide]
PREFA02	5.07755	0.300804	0.0317466	4.34427	0.954645	0.0961529
PREFA02	3.08584	0.27635	0.13442	6.78478	1.07427	0.0963778
PREFA03	5.07755	0.300804	0.0317466	4.34427	0.954645	0.0961529
PREFA03	3.08584	0.27635	0.13442	6.78478	1.07427	0.0963778
PREFA04	5.07755	0.300804	0.0317466	4.34427	0.954645	0.0961529
PREFA04	3.08584	0.27635	0.13442	6.78478	1.07427	0.0963778
PREFA05	5.07755	0.300804	0.0317466	4.34427	0.954645	0.0961529
PREFA05	3.08584	0.27635	0.13442	6.78478	1.07427	0.0963778
PREFA06	5.07755	0.300804	0.0317466	4.34427	0.954645	0.0961529
PREFA06	3.08584	0.27635	0.13442	6.78478	1.07427	0.0963778
PREFA07	5.07755	0.300804	0.0317466	4.34427	0.954645	0.0961529
PREFA07	3.08584	0.27635	0.13442	6.78478	1.07427	0.0963778
PREFA08	5.07755	0.300804	0.0317466	4.34427	0.954645	0.0961529
PREFA08	3.08584	0.27635	0.13442	6.78478	1.07427	0.0963778
PREFA09	5.07755	0.300804	0.0317466	4.34427	0.954645	0.0961529
PREFA10	5.07755	0.300804	0.0317466	4.34427	0.954645	0.0961529
PREFA11	5.07755	0.300804	0.0317466	4.34427	0.954645	0.0961529
PREFA11	3.08584	0.27635	0.13442	6.78478	1.07427	0.0963778
PREFA12	5.07755	0.300804	0.0317466	4.34427	0.954645	0.0961529
PREFA12	3.08584	0.27635	0.13442	6.78478	1.07427	0.0963778
PREFA13	5.07755	0.300804	0.0317466	4.34427	0.954645	0.0961529
PREFA13	3.08584	0.27635	0.13442	6.78478	1.07427	0.0963778
PREFA14	5.07755	0.300804	0.0317466	4.34427	0.954645	0.0961529
PREFA14	3.08584	0.27635	0.13442	6.78478	1.07427	0.0963778
PREFA15	5.07755	0.300804	0.0317466	4.34427	0.954645	0.0961529
PREFA15	3.08584	0.27635	0.13442	6.78478	1.07427	0.0963778
PREFA16	5.07755	0.300804	0.0317466	4.34427	0.954645	0.0961529
PREFA16	3.08584	0.27635	0.13442	6.78478	1.07427	0.0963778
PREFA17	5.07755	0.300804	0.0317466	4.34427	0.954645	0.0961529
PREFA17	3.08584	0.27635	0.13442	6.78478	1.07427	0.0963778
PREFA18	5.07755	0.300804	0.0317466	4.34427	0.954645	0.0961529
PREFA18	3.08584	0.27635	0.13442	6.78478	1.07427	0.0963778
PREFA19	5.07755	0.300804	0.0317466	4.34427	0.954645	0.0961529
PREFA19	3.08584	0.27635	0.13442	6.78478	1.07427	0.0963778
PREFA20	5.07755	0.300804	0.0317466	4.34427	0.954645	0.0961529
PREFA20	3.08584	0.27635	0.13442	6.78478	1.07427	0.0963778
PREFA21	5.07755	0.300804	0.0317466	4.34427	0.954645	0.0961529
PREFA21	3.08584	0.27635	0.13442	6.78478	1.07427	0.0963778
PREFA22	5.07755	0.300804	0.0317466	4.34427	0.954645	0.0961529
PREFA22	3.08584	0.27635	0.13442	6.78478	1.07427	0.0963778
PREFA23	5.07755	0.300804	0.0317466	4.34427	0.954645	0.0961529
PREFA23	3.08584	0.27635	0.13442	6.78478	1.07427	0.0963778
PREFA24	5.07755	0.300804	0.0317466	4.34427	0.954645	0.0961529
PREFA24	3.08584	0.27635	0.13442	6.78478	1.07427	0.0963778
PREFA25	5.07755	0.300804	0.0317466	4.34427	0.954645	0.0961529
PREFA25	3.08584	0.27635	0.13442	6.78478	1.07427	0.0963778
PREFA26	5.07755	0.300804	0.0317466	4.34427	0.954645	0.0961529
PREFA27	5.07755	0.300804	0.0317466	4.34427	0.954645	0.0961529
PREFA28	5.07755	0.300804	0.0317466	4.34427	0.954645	0.0961529
PREFA29	5.07755	0.300804	0.0317466	4.34427	0.954645	0.0961529
PREFA30	5.07755	0.300804	0.0317466	4.34427	0.954645	0.0961529
PREFA31	5.07755	0.300804	0.0317466	4.34427	0.954645	0.0961529
PREFA32	5.07755	0.300804	0.0317466	4.34427	0.954645	0.0961529
PREFA33	5.07755	0.300804	0.0317466	4.34427	0.954645	0.0961529
PREFA34	5.07755	0.300804	0.0317466	4.34427	0.954645	0.0961529
PREFA35	5.07755	0.300804	0.0317466	4.34427	0.954645	0.0961529
PREFA36	5.07755	0.300804	0.0317466	4.34427	0.954645	0.0961529
PREFA37	5.07755	0.300804	0.0317466	4.34427	0.954645	0.0961529
PREFA38	5.07755	0.300804	0.0317466	4.34427	0.954645	0.0961529
PREFA39	5.07755	0.300804	0.0317466	4.34427	0.954645	0.0961529
PREFA40	5.07755	0.300804	0.0317466	4.34427	0.954645	0.0961529
PREFA41	5.07755	0.300804	0.0317466	4.34427	0.954645	0.0961529
PREFA42	5.07755	0.300804	0.0317466	4.34427	0.954645	0.0961529
PREFA43	5.07755	0.300804	0.0317466	4.34427	0.954645	0.0961529
PREFB02	4.37834	0.238659	0.0314345	4.26574	0.887733	0.0987667
PREFB02	2.99598	0.296697	0.124823	7.12096	1.06906	0.0978562
PREFB03	6.19398	0.300804	0.0292488	5.60857	1.06551	0.110322
PREFB03	2.91247	0.304178	0.115984	6.06817	1.04289	0.0970986
PREFB04	5.24576	0.309064	0.0325267	4.49186	0.991467	0.094197
PREFB04	3.08689	0.274554	0.13463	6.89007	0.951296	0.0944617
PREFB05	6.25005	0.33581	0.0328659	4.20752	0.996571	0.0983719
PREFB05	2.97061	0.259294	0.129089	6.54338	1.138	0.0936656
PREFB06	4.57623	0.214666	0.0274418	3.91167	1.00943	0.0939315
PREFB06	3.08161	0.298792	0.135282	7.69021	1.11687	0.0962557
PREFB07	4.86812	0.344069	0.0305656	4.42076	0.904976	0.095234
PREFB07	3.14926	0.321533	0.14713	6.31843	1.11652	0.0927773
PREFB08	5.59701	0.381435	0.0287784	3.96679	0.929604	0.0982474
PREFB08	3.07738	0.280539	0.130266	7.4549	1.12021	0.0969595
PREFB09	4.24642	0.294511	0.0316957	4.68959	0.997759	0.0987492
PREFB10	5.11218	0.30867	0.0312991	4.77697	0.998421	0.0945532
PREFB11	4.51522	0.357049	0.0295952	4.34421	0.886667	0.0964914
PREFB11	3.00656	0.289516	0.151428	6.43639	1.05775	0.0937839
PREFB12	4.82525	0.274058	0.0316321	4.37525	0.956736	0.0916892
PREFB12	2.9389	0.283531	0.154298	7.79162	1.20611	0.0957819
PREFB13	5.03798	0.30395	0.029961	4.40239	1.02075	0.0921842
PREFB13	3.09007	0.300288	0.136543	6.18524	1.00988	0.0945326
PREFB14	5.10229	0.313784	0.0307387	4.70011	0.952962	0.0951153
PREFB14	3.14821	0.262286	0.162292	7.09068	1.15423	0.0967468
PREFB15	5.95157	0.289397	0.0316916	4.44461	1.05004	0.0954599
PREFB15	2.91987	0.281137	0.111968	6.45039	0.95914	0.0999551
PREFB16	4.86977	0.288218	0.0302143	4.35065	0.941335	0.0989089
PREFB16	2.98753	0.310462	0.116549	6.83595	1.04976	0.0973198
PREFB17	5.79985	0.292151	0.0314241	4.07747	0.916657	0.095199
PREFB17	3.15666	0.271861	0.144992	6.44021	1.07202	0.0973129
PREFB18	5.8048	0.266978	0.0297131	4.32788	0.961277	0.0966295
PREFB18	2.91142	0.286224	0.101067	6.23125	0.97932	0.0971806
PREFB19	4.82689	0.324797	0.0308773	4.44428	0.995382	0.098327
PREFB19	3.25603	0.286823	0.121221	6.91572	0.999686	0.0960002
PREFB20	4.72465	0.30867	0.0309198	4.57023	1.02302	0.0943824
PREFB20	3.02558	0.276549	0.109618	7.09778	1.02985	0.0986587
PREFB21	5.24411	0.32283	0.0314806	4.19904	0.898017	0.0967078
PREFB21	3.1778	0.295201	0.110578	6.53401	0.919759	0.0966504
PREFB22	4.47564	0.309457	0.0286208	4.33221	0.952096	0.0978787
PREFB22	3.24334	0.267971	0.130579	6.4241	1.08189	0.0978494
PREFB23	5.5393	0.337383	0.030474	4.2031	1.06016	0.0989867
PREFB23	3.20106	0.262585	0.141007	6.73319	1.09302	0.099412
PREFB24	5.11054	0.322043	0.0321101	4.41058	0.894719	0.0946043
PREFB24	3.1852	0.264381	0.137637	7.13591	1.15914	0.096721
PREFB25	5.12373	0.350756	0.0307	4.02472	0.856681	0.0951956
PREFB25	2.9833	0.271861	0.129469	6.86951	1.05059	0.0970401
PREFB26	4.47729	0.265798	0.0301422	4.37805	0.992706	0.0945261
PREFA26a	5.07755	0.300804	0.0317466	4.34427	0.954645	0.0961529
PREFB26a	5.65143	0.268158	0.0272292	3.8845	0.840137	0.0951039
PREFB27	4.98685	0.322437	0.0320726	4.22861	0.864983	0.0964279
PREFB28	4.94398	0.363736	0.0306085	3.84614	0.941939	0.0952483
PREFB29	5.32986	0.281138	0.0309314	4.74121	0.950136	0.0933799
PREFB30	5.1765	0.272878	0.0302555	4.42569	0.937375	0.0979989
PREFB31	4.48059	0.314963	0.0326875	4.13491	1.00524	0.0928511
PREFB32	4.47399	0.31693	0.0310112	4.09412	0.921892	0.0961959
PREFB33	4.70321	0.274451	0.0312298	4.05029	0.981269	0.0964003
PREFB34	5.38098	0.296084	0.0279302	4.4337	0.867687	0.0944722
PREFB35	4.94233	0.32283	0.0299954	4.17394	0.894737	0.0967704
PREFB36	5.1798	0.294511	0.0314322	4.01005	0.843322	0.0966399
PREFB37	4.31733	0.263438	0.0317539	4.35551	0.938654	0.0968946
PREFB38	4.84503	0.296871	0.0361637	4.73072	0.936926	0.0962912
PREFB39	4.54325	0.271305	0.0312589	4.43014	0.914289	0.0958545
PREFB40	5.4453	0.274845	0.0304419	4.28834	1.01218	0.0983967
PREFB41	5.442	0.32755	0.031596	4.11801	0.86301	0.0983393
PREFB42	5.41067	0.298837	0.0292699	4.18725	0.957771	0.0888528
PREFB43	5.03138	0.304344	0.0322133	4.42184	0.983819	0.0945277

## Sheet: 5. pooled_plasma_relative
Metabolite	phenylalanine-d8	valine-d8	3-hydroxyanthranilic acid	3-indoleacetic acid	3-methoxyanthranilate	5-hydroxytryptophan	5-methoxytryptophol	anthranilic acid	kynurenic acid	L-kynurenine
PREFB45	3222954	511788	1836	5584	1052	589902	7082	550	1822906	8203
PREFB46	3232088	508417	2072	5458	1057	556742	7345	614	1705360	9264
PREFB47	3469468	537906	1918	5668	1188	537235	7282	648	1770769	9158
PREFB48	3197345	532087	2053	5401	1012	567295	7497	624	1758957	9713
PREFB49	3544589	509202	2044	5326	1127	555737	7064	688	1794327	8368
PREFB50	3353809	527101	2182	5535	1000	569444	7455	575	1675479	8856
PREFB51	3300036	544352	2033	5833	1008	524817	6765	560	1665616	8831
PREFB52	3203270	522823	2206	5557	1099	536888	7295	531	1672220	8341
PREFB53	3248793	517344	2009	5690	952	535629	6981	561	1356318	8728
PREFB54	3347293	530702	1847	5333	1101	578084	6908	644	1744543	8827
PREFB55	3248578	531248	1963	5703	923	509924	7076	574	1668645	8622
PREFB56	3350734	529440	1935	5447	1219	555956	6951	615	1681836	9181
PREFB57	3317415	534667	2030	5588	987	553304	6890	678	1733625	8873
PREFB28	3.37251e+06	536300	15481.8	2248.87		33413.9	6640.82	339.366	2.94376e+06	14566.6
PREFB29	3.29127e+06	531818	17524.8	2058.75		34961.3	6940.69	333.498	2.44073e+06	13530.7
PREFB30	4.00884e+06	577527	18948.3	2145.66		35319	6852.81	347.19	2.62418e+06	13496.2
PREFB31	3.77433e+06	550520	17024	2286.9		36230.6	6507.64	375.552	2.95713e+06	13561.6
PREFB32	3.5436e+06	568379	17899.4	2199.99		35927.1	6660.75	364.794	2.44128e+06	13926.9
PREFB33	4.04804e+06	559336	16875.6	2189.12		35509.4	6714.2	315.894	2.69414e+06	12466.7
PREFB34	3.77691e+06	548642	17470.1	2183.69		36955.2	6945.22	339.366	2.80655e+06	13360.8
PREFB35	3.89142e+06	540617	15231.4	1933.81		35923.7	6862.78	373.596	2.11952e+06	13573.4
PREFB36	3.2657e+06	539171	17592.5	2145.66		35151.7	6781.24	307.092	2.84525e+06	14021.4
PREFB37	3.75026e+06	577427	16274.7	2134.8		33061.9	6721.45	312.96	2.01004e+06	14352.2
PREFB38	3.45562e+06	559456	19488.1	2091.34		34087.8	6840.13	350.124	3.19929e+06	14120.5

## Sheet: 6. pooled_plasma_absolute
Metabolite	[3-indoleacetic acid]	[kynurenic acid]	[L-kynurenine]	[anthranilic acid]	[L-tryptophan]	[niacinamide]
PREFA28	8.34539	0.0560543	6.2482	0.0271135	27.2233	0.16382
PREFA29	8.34539	0.0560543	6.2482	0.0271135	27.2233	0.16382
PREFA30	8.34539	0.0560543	6.2482	0.0271135	27.2233	0.16382
PREFA31	8.34539	0.0560543	6.2482	0.0271135	27.2233	0.16382
PREFA32	8.34539	0.0560543	6.2482	0.0271135	27.2233	0.16382
PREFA33	8.34539	0.0560543	6.2482	0.0271135	27.2233	0.16382
PREFA34	8.34539	0.0560543	6.2482	0.0271135	27.2233	0.16382
PREFA35	8.34539	0.0560543	6.2482	0.0271135	27.2233	0.16382
PREFA36	8.34539	0.0560543	6.2482	0.0271135	27.2233	0.16382
PREFA37	8.34539	0.0560543	6.2482	0.0271135	27.2233	0.16382
PREFA38	8.34539	0.0560543	6.2482	0.0271135	27.2233	0.16382
PREFB28	8.86291	0.065463	6.63957	0.02728	26.6141	0.167769
PREFB29	8.19206	0.0522412	6.18981	0.026947	29.0961	0.160024
PREFB30	8.49873	0.0570631	6.17482	0.027724	25.6151	0.164331
PREFB31	8.99708	0.0658145	6.20322	0.0293335	27.5218	0.161188
PREFB32	8.6904	0.0522558	6.36182	0.028723	26.0784	0.159238
PREFB33	8.65207	0.0589021	5.72782	0.025948	25.0452	0.163042
PREFB34	8.6329	0.0618566	6.11603	0.02728	24.1265	0.164089
PREFB35	7.75121	0.0437983	6.20835	0.0292225	25.2729	0.162675
PREFB36	8.49873	0.0628738	6.40285	0.0254485	29.4361	0.159427
PREFB37	8.4604	0.0409209	6.54646	0.0257815	26.501	0.165238
PREFB38	8.30706	0.0721794	6.44585	0.0278905	27.0157	0.163692
